# Supplementary material
Source: publisher site journal article supplement (https://www.dovepress.com/get_supplementary_file.php?f=371420.xlsx)
Supplement: Supplementary file 1 [file get_supplementary_file.php]

## Sheet: Table S1
Table S1 identification of significant DEGs in LUAD
geneNames	logFC	logCPM	PValue	FDR
RTKN2	-4.03767	5.4406	3.88e-225	1.35e-220
FAM107A	-4.49281	5.16863	1.76e-210	3.06e-206
SLC6A4	-6.12722	4.51341	7.06e-178	1.53e-174
FCN3	-4.48299	4.97928	1.65e-176	3.38e-173
AL606469.1	-5.11522	-0.966949	1.43e-171	2.61e-168
AL590226.1	-3.64655	-0.681304	2.6e-163	3.77e-160
ANGPT4	-4.18426	0.23037	2.11e-159	2.71e-156
AGER	-4.99805	8.20772	1.77e-158	2.19e-155
FABP4	-4.86185	4.32995	8e-156	9.26e-153
TMEM100	-4.32067	4.57191	2.25e-144	1.82e-141
FENDRR	-3.8655	3.30767	3.62e-139	2.73e-136
SGCG	-3.79276	-0.100903	4.14e-138	3e-135
CLEC3B	-3.65412	4.30059	9.38e-138	6.65e-135
GPD1	-3.90023	3.57076	1.46e-126	8.04e-124
MIR3945HG	-3.51625	-0.0260525	1.19e-125	6.38e-123
LANCL1-AS1	-3.57542	0.261176	3.73e-124	1.96e-121
LINC01082	-4.12017	-2.56279	1.4e-123	7.15e-121
GPM6A	-4.40827	3.12785	8.5e-123	4.22e-120
HBB	-4.21695	6.84583	1.34e-120	6.29e-118
HBA2	-4.11403	4.316	2.98e-120	1.38e-117
HBA1	-4.35751	-1.00885	2.4e-118	1.04e-115
CD300LG	-4.93891	1.37408	3.45e-118	1.44e-115
TNNC1	-3.52139	3.77211	3.19e-117	1.3e-114
CLIC5	-3.58152	6.17897	5.88e-117	2.37e-114
SCUBE1	-3.52073	2.98634	5.68e-115	2.12e-112
AC135012.3	-4.0161	-1.81921	5.26e-114	1.88e-111
GPIHBP1	-3.67079	3.115	5.82e-113	2.04e-110
MCEMP1	-3.99376	4.62417	5.09e-112	1.77e-109
ALAS2	-4.05327	-0.94899	9.35e-109	3.03e-106
AC009093.3	-4.10582	1.50253	9.28e-108	2.93e-105
CA4	-4.31754	2.73599	8.1e-107	2.53e-104
WNT3A	-4.06442	1.23966	9.39e-106	2.84e-103
FREM3	-4.26643	-0.918973	4.84e-104	1.42e-101
CD5L	-4.02211	-1.00689	1.02e-103	2.99e-101
CLEC4M	-4.42287	-1.43644	3.18e-103	9.13e-101
C10orf67	-3.93594	-0.163378	1.79e-101	4.93e-99
OVCH1	-3.90774	-0.396287	1.91e-100	5.07e-98
LINC02016	-4.90295	-1.12782	6.59e-98	1.6e-95
MYOC	-4.49045	-0.267278	1.36e-97	3.29e-95
ANKRD1	-4.37948	3.58203	7.16e-97	1.68e-94
TNR	-3.81918	0.533183	3.97e-95	8.83e-93
PYCR1	3.76996	6.81982	5.01e-95	1.11e-92
AC095050.1	-4.48884	-2.88848	3.11e-94	6.74e-92
CSF3	-4.61495	3.22402	1.07e-93	2.3e-91
RS1	-3.68012	-0.145263	2.76e-93	5.84e-91
UPK3B	-4.106	4.73183	2.1e-92	4.28e-90
LINC01996	-4.39253	-0.736353	3.23e-92	6.55e-90
CHRM1	-4.38695	-0.339992	1.28e-91	2.56e-89
AC084030.1	-4.35249	-3.47211	1.2e-88	2.25e-86
AC104984.1	-4.06567	-3.1682	4.56e-85	8.07e-83
AC128709.3	-4.22634	-2.80477	7.26e-85	1.25e-82
SH3GL3	-4.18405	-0.140827	4.84e-83	8.05e-81
AC104984.4	-3.98787	-2.55693	4.77e-81	7.71e-79
SSTR4	-3.75357	-3.96411	1.81e-80	2.88e-78
AC008763.3	-3.94365	-3.38912	1.15e-79	1.74e-77
OR6K3	-4.15638	-3.70647	1.53e-79	2.31e-77
VEGFD	-3.54936	3.29352	2.21e-78	3.25e-76
TEDC2	3.57337	2.56356	1.22e-76	1.72e-74
GRIA1	-3.68846	1.92774	3e-75	4.09e-73
NCAPGP2	-4.03849	-2.61945	4.75e-73	6.18e-71
PI16	-3.54233	1.20896	9.02e-73	1.16e-70
HTR3C	-4.50086	-1.20053	1.86e-72	2.33e-70
LGI3	-4.22987	3.7522	7.03e-72	8.72e-70
ITLN2	-4.59316	2.33639	1e-71	1.23e-69
SFTPC	-4.70653	11.7699	4.5e-71	5.43e-69
IQGAP3	3.67618	4.87449	9.02e-71	1.08e-68
ADAMTS7P3	-3.50891	1.23013	1.68e-70	1.97e-68
ETV4	3.89591	5.52144	8.68e-70	9.92e-68
SERTM1	-4.73793	1.29525	1.11e-69	1.26e-67
FAM83A	6.8715	7.16372	1.05e-68	1.16e-66
TOP2A	3.93265	6.85455	5.63e-67	5.99e-65
SAPCD2	3.83376	3.98246	1.44e-66	1.51e-64
ANGPTL7	-3.63531	-0.739319	2.53e-65	2.57e-63
ADM2	3.52841	4.03047	1.54e-64	1.5e-62
B3GNT3	4.45302	5.47734	1.29e-63	1.21e-61
TUBB3	4.7878	2.98491	1.6e-63	1.49e-61
CDC25C	3.71866	2.10344	3.5e-63	3.22e-61
OTC	-3.58366	-2.25179	1.5e-62	1.36e-60
KIF4A	3.9009	4.23715	1.78e-62	1.6e-60
KCNA4	-3.85153	-0.595085	2.39e-62	2.15e-60
AC010776.3	-3.75601	-3.78854	3.09e-62	2.76e-60
LINC02014	3.9724	-0.11642	1.4e-61	1.21e-59
KIF14	3.81452	3.25422	1.78e-61	1.53e-59
FAM83A-AS1	6.52276	1.95034	4.56e-61	3.82e-59
RPL13AP17	-3.91924	1.45005	8.5e-61	7.03e-59
NEK2	3.80278	3.89193	3.55e-60	2.85e-58
HJURP	3.92277	3.90791	3.68e-60	2.95e-58
ASPM	3.78738	4.40233	5.08e-60	4.03e-58
AL354714.1	-3.95578	-1.49805	8.77e-60	6.86e-58
CENPF	3.55834	5.66824	4.26e-59	3.24e-57
LINC01977	4.91541	0.613376	2.03e-58	1.51e-56
DLGAP5	3.74751	3.99389	3.13e-58	2.32e-56
PTPRQ	-3.54807	0.520809	5.21e-58	3.81e-56
MEX3A	4.2516	4.83849	7.5e-58	5.43e-56
NUF2	3.76628	3.60631	1.07e-57	7.69e-56
KIF2C	3.63752	4.47889	1.28e-57	9.15e-56
SOSTDC1	-3.6689	2.60037	2.75e-57	1.93e-55
CDC20	3.83779	5.05723	2.82e-57	1.98e-55
CHRNA2	-3.55198	-2.26665	8.42e-57	5.8e-55
EXO1	3.66261	3.20426	1.37e-56	9.35e-55
DEPDC1B	3.66127	2.89484	2.1e-56	1.42e-54
MELK	3.67669	3.90235	2.2e-56	1.48e-54
ANLN	3.85475	5.51157	2.25e-56	1.51e-54
KIF18B	3.83568	3.62257	3.15e-56	2.1e-54
CTHRC1	3.8256	6.08198	6.44e-56	4.24e-54
C10orf88B	3.75792	-0.0176966	1.18e-55	7.76e-54
TROAP	3.89129	3.72934	1.78e-55	1.16e-53
DEPDC1	3.88866	3.41021	8.39e-55	5.34e-53
TPX2	3.7103	5.76028	3.29e-54	2.01e-52
BIRC5	3.74125	5.28314	1.61e-53	9.58e-52
UBE2C	4.24891	5.2004	1.96e-53	1.16e-51
AFAP1-AS1	6.39191	6.10137	2.79e-53	1.64e-51
FRMD5	3.62186	2.86438	1.36e-52	7.77e-51
TMPRSS4	4.88621	6.87886	1.88e-52	1.07e-50
MNX1-AS1	5.19372	0.652891	5.89e-52	3.27e-50
MCM10	3.60108	3.15804	1.51e-51	8.24e-50
EPHA10	3.67935	3.50814	2.02e-51	1.09e-49
COL10A1	4.6496	5.89127	3.3e-51	1.77e-49
CENPA	3.68091	2.62883	7.75e-51	4.09e-49
PPP1R14B-AS1	3.5273	0.544374	9.29e-51	4.9e-49
RASAL1	4.07903	3.41096	1.9e-50	9.93e-49
AC093787.1	-3.96487	-3.35731	3.27e-50	1.69e-48
ABCA12	5.4383	3.66827	3.6e-50	1.86e-48
AURKB	3.50815	3.74596	6.26e-50	3.2e-48
HMGB3	3.55657	8.10674	1.41e-49	7.07e-48
PTPRH	5.25514	3.99643	3.54e-49	1.75e-47
AC140479.2	4.1485	0.620225	4.17e-49	2.05e-47
ZYG11A	5.38481	1.71328	1.03e-48	4.97e-47
CRABP2	5.63788	7.44292	4.61e-48	2.18e-46
PSAT1	3.54726	4.74618	5.85e-48	2.76e-46
RDM1	3.61052	-0.228467	1.08e-47	4.99e-46
RUNDC3A-AS1	3.78022	0.681954	4.43e-47	1.99e-45
ZFPM2-AS1	5.38785	1.82922	5.06e-47	2.27e-45
GREM1	5.07572	5.88169	8.76e-47	3.84e-45
FER1L4	4.21892	4.18979	9.36e-47	4.09e-45
AC020907.1	5.82463	0.145484	1.73e-46	7.48e-45
RAB26	3.6764	1.87596	4.77e-46	2.02e-44
RGS17	3.76134	3.48587	4.99e-46	2.11e-44
NEIL3	4.32461	2.24378	1.37e-45	5.71e-44
AC068228.1	5.44317	-1.64872	1.45e-45	6.04e-44
MYBL2	3.89154	5.63548	5.12e-45	2.08e-43
Z98257.1	6.07897	3.35963	6.54e-45	2.65e-43
SLC2A1	3.57906	7.42449	1.55e-44	6.16e-43
HS6ST2	3.75439	5.42555	1.89e-44	7.48e-43
AC080037.2	5.29116	0.718451	2.62e-44	1.03e-42
ONECUT1	6.57733	-0.10042	5.39e-44	2.12e-42
MNX1	4.33302	1.32536	8.78e-44	3.42e-42
GJB2	4.6275	5.17007	2.49e-43	9.53e-42
FEZF1-AS1	6.18648	2.85383	2.62e-43	9.98e-42
FOXD3-AS1	6.90644	0.215064	9.91e-43	3.71e-41
GRHL3	3.57879	1.80446	1.13e-42	4.21e-41
TFAP2A	3.8089	3.95588	1.95e-42	7.23e-41
KISS1R	6.1824	0.835957	2.89e-42	1.06e-40
LINC02416	4.25083	-1.19279	3.22e-42	1.18e-40
MMP11	5.30582	6.58386	4.09e-42	1.49e-40
ARSH	5.08604	-1.09648	6.4e-42	2.31e-40
ATP10B	5.53819	3.9759	7.39e-42	2.66e-40
CYP1A2	-3.78667	-1.14715	9.22e-42	3.3e-40
SPP1	4.82893	9.22884	1.15e-41	4.1e-40
LHFPL5	5.015	-1.42163	2.14e-41	7.59e-40
BCL2L15	3.57203	3.77141	7.69e-41	2.64e-39
PITX2	8.15408	2.86908	2.33e-40	7.92e-39
DGCR5	3.56466	2.21172	2.82e-40	9.56e-39
SLC24A2	5.07062	0.251494	3.21e-40	1.09e-38
PACRG-AS3	-3.50614	-2.75148	5.27e-40	1.75e-38
COL11A1	6.27468	6.08531	7.21e-40	2.38e-38
RHBG	4.61672	0.0683135	8.95e-40	2.95e-38
XDH	4.12068	4.48637	1.77e-39	5.75e-38
GCNT3	5.21199	5.64747	2.51e-39	8.1e-38
ENTPD8	4.70512	2.31945	2.51e-39	8.12e-38
PPP1R14D	6.01862	3.70599	3.85e-39	1.24e-37
HNF4G	3.55281	3.09478	7.66e-39	2.42e-37
SYT7	3.5133	6.01515	9.31e-39	2.92e-37
SYT12	5.49111	4.85667	1.46e-38	4.55e-37
DMBX1	6.37185	0.687417	1.61e-38	5e-37
LYPD1	4.13567	2.46557	1.72e-38	5.31e-37
ITPKA	5.21938	3.76201	1.73e-38	5.34e-37
CYP24A1	6.78836	6.5395	1.93e-38	5.94e-37
AC011294.1	4.88774	0.501547	3.31e-38	1.01e-36
TERT	5.4289	0.0288703	7.23e-38	2.17e-36
CDC37P2	3.82212	-1.69482	1.55e-37	4.59e-36
MYEOV	6.34371	4.31154	2.42e-37	7.09e-36
AP002856.2	-4.03049	-1.32712	2.59e-37	7.6e-36
LINC02882	6.85458	-0.0206457	1.07e-36	3.05e-35
B4GALNT4	4.81044	3.46907	1.16e-36	3.29e-35
CABYR	4.70562	3.65153	1.58e-36	4.45e-35
AC133785.1	6.66574	-0.649532	4.35e-36	1.2e-34
TMPRSS11E	6.74499	3.69634	6.75e-36	1.85e-34
IL1RAPL2	6.16234	-0.952424	7.33e-36	2e-34
CHIAP2	-3.6637	1.67866	8.61e-36	2.34e-34
STRA6	4.52809	3.93688	8.85e-36	2.4e-34
LINC02535	4.39263	-0.694289	9.7e-36	2.62e-34
GALNT14	3.73674	4.32508	1.09e-35	2.94e-34
LASTR	5.11459	-0.878399	1.11e-35	2.99e-34
DNAJC22	3.51377	3.32649	1.36e-35	3.63e-34
CCNP	4.35993	2.02046	5.75e-35	1.5e-33
CGREF1	4.17346	2.82914	5.78e-35	1.51e-33
CARD14	3.51698	3.3039	5.95e-35	1.55e-33
HTR3A	5.93532	3.077	1.15e-34	2.95e-33
AC007128.1	5.46516	-0.193537	1.25e-34	3.19e-33
CILP2	3.54708	3.58329	1.57e-34	3.98e-33
AL391056.1	4.35939	1.6618	1.65e-34	4.19e-33
C2CD4A	4.15434	3.97226	3.02e-34	7.58e-33
AP003559.1	3.57538	-0.353302	4.78e-34	1.18e-32
EEF1A2	6.43767	5.93334	4.78e-34	1.18e-32
NMU	4.62759	2.41083	5.87e-34	1.45e-32
CHRNA5	3.66113	2.32076	6.39e-34	1.57e-32
ZNF695	4.43309	0.229104	9.72e-34	2.36e-32
PITX1	4.61114	3.92213	1.19e-33	2.87e-32
FEZF1	5.65781	1.82887	1.41e-33	3.38e-32
DNAJC12	4.30484	4.59727	1.48e-33	3.55e-32
TRPM8	7.065	3.27776	2.35e-33	5.61e-32
PCMTD1P3	4.24247	-2.01305	2.35e-33	5.61e-32
YBX2	4.78917	2.46837	2.49e-33	5.93e-32
BBOX1-AS1	5.56228	0.866219	2.53e-33	6.01e-32
TMEM63C	4.06659	3.51345	3.1e-33	7.35e-32
AC009065.2	3.85067	0.985544	3.7e-33	8.74e-32
WFDC3	3.97392	3.39278	3.94e-33	9.28e-32
AC015849.5	3.67602	-0.857816	4.89e-33	1.15e-31
AC026120.1	4.41885	-1.5532	6.14e-33	1.42e-31
CASKIN1	3.71584	0.134741	9.63e-33	2.21e-31
LINC01614	3.68428	0.892382	9.9e-33	2.27e-31
ARHGAP40	3.73043	3.34132	1.15e-32	2.62e-31
TAS2R2P	5.24262	-2.4214	1.42e-32	3.24e-31
MIR924HG	3.84858	-0.206758	1.68e-32	3.81e-31
CP	3.5524	8.52432	1.88e-32	4.26e-31
AC027228.2	3.89193	0.702918	2.51e-32	5.67e-31
AC009065.5	3.95489	0.871324	4.04e-32	9.02e-31
LINC02332	3.93131	-2.55437	4.72e-32	1.05e-30
ADGRF4	4.55711	2.57144	5.1e-32	1.13e-30
AKR7A3	5.07182	3.29329	7.5e-32	1.65e-30
TBX15	3.79343	3.37523	8.22e-32	1.8e-30
FAM172BP	3.89768	-0.650276	8.9e-32	1.95e-30
AC013268.3	3.69206	-0.951948	1.56e-31	3.36e-30
PLPP4	4.14088	1.23068	1.59e-31	3.43e-30
SCAT8	4.03228	1.42771	2.07e-31	4.44e-30
AC025580.1	4.11812	1.90138	2.23e-31	4.76e-30
BARX2	3.95959	3.46108	2.3e-31	4.91e-30
AC120036.1	5.29812	-0.962742	3.04e-31	6.45e-30
HPDL	3.53748	0.994841	3.21e-31	6.79e-30
MMP13	6.19758	4.97666	3.32e-31	7e-30
HHIPL2	6.08405	3.22283	3.46e-31	7.29e-30
LINC00862	3.84223	-0.502343	4.45e-31	9.32e-30
AL645608.8	3.99358	-1.1833	5.23e-31	1.09e-29
AL365181.3	4.50719	3.623	5.72e-31	1.19e-29
LINC01711	3.84649	-1.61126	5.87e-31	1.22e-29
CLDN10-AS1	6.4632	0.703596	6.01e-31	1.25e-29
C11orf86	7.93527	1.52482	7.52e-31	1.55e-29
PLAC1	4.84119	-0.15048	8.73e-31	1.79e-29
GAD1	3.82659	1.85059	1.8e-30	3.64e-29
BAIAP2L2	3.74497	2.68596	2.13e-30	4.29e-29
CA9	5.64973	4.32875	2.13e-30	4.29e-29
PRAME	7.58268	4.5495	2.16e-30	4.34e-29
NPSR1-AS1	5.88256	-1.45303	3.7e-30	7.34e-29
MMP1	5.29168	6.82454	4.22e-30	8.33e-29
ONECUT2	4.99553	2.17132	5.05e-30	9.91e-29
AL121949.2	6.00488	0.185853	8.95e-30	1.73e-28
AP005233.2	6.08836	-0.35337	1.45e-29	2.78e-28
AOC1	5.03116	5.318	1.48e-29	2.85e-28
SPINK1	6.64911	7.60005	1.7e-29	3.26e-28
LGSN	4.61536	4.35398	1.91e-29	3.64e-28
CST1	6.45626	4.35707	1.94e-29	3.7e-28
AL365181.2	5.38781	2.29867	2.05e-29	3.9e-28
SPP2	7.38223	0.319804	2.09e-29	3.97e-28
AC007128.2	6.03554	-1.77236	2.32e-29	4.39e-28
TNFSF11	4.12558	1.32974	2.43e-29	4.58e-28
LINC00634	3.78547	-1.9816	3.02e-29	5.67e-28
NETO1	4.8067	0.492333	4.12e-29	7.7e-28
LRRC37A9P	3.77745	-1.98706	5.88e-29	1.09e-27
B3GNT6	5.7929	4.17029	6.22e-29	1.15e-27
H2AC13	4.95756	0.404281	6.27e-29	1.16e-27
LINC01460	3.9638	0.296643	6.32e-29	1.16e-27
LINC02159	4.21875	0.879935	7.97e-29	1.46e-27
VIL1	7.00658	4.6514	9.32e-29	1.7e-27
COCH	3.77404	2.72242	1.01e-28	1.83e-27
H2AC17	4.83109	-0.655969	1.16e-28	2.1e-27
PROC	4.05468	2.18442	1.21e-28	2.18e-27
COL22A1	3.63406	2.43031	1.37e-28	2.46e-27
CLPSL2	5.37168	-0.795297	1.54e-28	2.76e-27
MUC3A	4.73108	5.9884	1.92e-28	3.44e-27
AL606490.8	5.29333	-2.82669	1.94e-28	3.46e-27
GNGT1	6.17928	-0.210592	2.15e-28	3.83e-27
CCDC185	4.51136	-1.26441	2.8e-28	4.96e-27
MROH3P	5.1085	-0.345899	4.46e-28	7.84e-27
NKX1-2	7.47609	1.01528	4.67e-28	8.2e-27
DLL3	6.84617	1.98746	5.4e-28	9.42e-27
BNIP5	5.46398	1.04092	5.74e-28	1e-26
PSMD10P2	5.10406	-1.12748	6.59e-28	1.14e-26
MMP12	4.01616	5.06892	7.47e-28	1.29e-26
BCL2L10	4.12869	-0.385047	9.54e-28	1.64e-26
AL590666.2	3.80082	0.971301	9.96e-28	1.71e-26
IL31RA	4.11645	1.84356	1.07e-27	1.83e-26
AC022784.1	4.57959	0.353859	1.53e-27	2.61e-26
EFNA2	5.63286	-1.16229	1.74e-27	2.95e-26
LINC02544	3.57949	-0.745444	1.76e-27	2.99e-26
SYNGR4	4.31883	-1.00009	1.8e-27	3.05e-26
FGL1	7.28579	5.75452	1.83e-27	3.1e-26
MIR9-1HG	5.51244	1.82814	1.85e-27	3.14e-26
DUSP13	6.09042	1.28113	1.85e-27	3.14e-26
LINC00942	6.59774	3.05862	3.09e-27	5.16e-26
HAVCR1	5.18081	1.41812	4.68e-27	7.74e-26
HOXC-AS2	5.12025	-0.688064	5.94e-27	9.76e-26
IL22RA2	3.75792	0.558633	6.65e-27	1.09e-25
KCNMB2-AS1	5.50056	1.00118	7.05e-27	1.15e-25
IGHG4	3.87904	8.55429	8.81e-27	1.44e-25
YWHAEP7	3.84175	-0.934503	8.96e-27	1.46e-25
AL121949.3	5.22435	-0.662265	9.17e-27	1.49e-25
KRTAP4-1	7.15721	0.222442	1.01e-26	1.64e-25
IGF2BP3	4.04325	3.71602	1.05e-26	1.7e-25
LINC01705	3.8431	-1.49825	1.17e-26	1.88e-25
GUCA1A	4.3859	-1.63282	1.25e-26	2.01e-25
S100P	5.1066	7.85387	1.3e-26	2.08e-25
AL138760.1	5.28043	-1.62935	1.35e-26	2.16e-25
BARX1	7.55554	3.91626	1.53e-26	2.44e-25
LINC01833	6.63536	0.682374	2.03e-26	3.21e-25
RHOV	3.70461	4.92069	2.06e-26	3.24e-25
AP002957.1	4.24459	-1.08903	2.39e-26	3.74e-25
ZPLD1	4.66746	-0.108684	2.43e-26	3.8e-25
AL353693.1	5.16318	-1.84178	2.47e-26	3.86e-25
NLRP3P1	4.59204	-1.86132	3.47e-26	5.38e-25
AP003108.5	3.88295	-0.750498	3.9e-26	6.03e-25
LINC02473	4.2132	-2.51197	4.18e-26	6.45e-25
NPSR1	6.03122	-1.04855	4.54e-26	6.98e-25
TRIM31	4.12704	3.35597	5.09e-26	7.81e-25
CEACAM5	4.8406	9.44864	5.88e-26	9e-25
IL36RN	6.24989	1.61011	6.57e-26	1e-24
PGLYRP4	4.29261	1.10438	8.79e-26	1.33e-24
AC007639.1	3.84973	-2.29357	1.27e-25	1.91e-24
IGFL2	3.82221	1.36614	1.3e-25	1.96e-24
PAEP	7.71444	6.31912	1.54e-25	2.31e-24
NXPH4	4.24106	2.41309	2.06e-25	3.05e-24
AC008496.2	4.51053	-0.445483	2.11e-25	3.12e-24
GPX2	6.01201	6.70703	2.12e-25	3.14e-24
NKAIN1	4.76704	0.129811	2.34e-25	3.45e-24
AL163953.1	5.28981	-2.53271	2.38e-25	3.5e-24
LYPD3	3.51121	4.19542	2.86e-25	4.2e-24
ECEL1	5.07385	2.34197	3.13e-25	4.57e-24
NPW	5.11175	1.88889	3.24e-25	4.73e-24
RPL23AP77	3.82901	-1.75617	3.3e-25	4.81e-24
AC090505.1	4.18541	-2.32486	3.48e-25	5.07e-24
AL121949.1	4.22871	2.36201	4.73e-25	6.82e-24
AC005256.1	6.67354	-1.9122	4.79e-25	6.91e-24
LINC00887	3.9342	-0.855509	6.6e-25	9.42e-24
LINC00628	3.64798	-2.74026	6.92e-25	9.87e-24
AC141557.2	3.58267	-2.1428	7.78e-25	1.1e-23
CDKN2A	3.57764	4.57415	8.35e-25	1.18e-23
INHA	6.41774	3.55498	9.23e-25	1.3e-23
LINC01395	5.02392	-1.47435	9.75e-25	1.38e-23
APCDD1L	4.15389	1.22436	1e-24	1.41e-23
AC093904.4	3.79721	0.0338215	1.01e-24	1.42e-23
AP002498.1	4.1208	0.0857193	1.03e-24	1.45e-23
LINC02003	4.1931	-2.48563	1.61e-24	2.23e-23
AL355796.1	4.66073	-0.757568	1.82e-24	2.5e-23
FOXI3	6.76198	1.52913	1.85e-24	2.54e-23
AC106900.1	4.49307	-1.75174	2.04e-24	2.79e-23
LHX2	4.7385	-0.498628	3.38e-24	4.59e-23
RAB3B	4.28967	3.06907	3.62e-24	4.91e-23
PPP2R2C	5.07473	3.50322	3.9e-24	5.28e-23
CST4	6.92553	0.254303	4.38e-24	5.89e-23
IL37	6.38703	3.23482	4.72e-24	6.35e-23
VGF	5.96924	2.53472	5.21e-24	6.98e-23
LINC02864	6.70303	2.93473	5.27e-24	7.05e-23
FUT9	6.60218	1.31275	5.56e-24	7.43e-23
AC099509.1	3.77564	0.0849957	5.59e-24	7.47e-23
DUSP9	4.5895	1.38165	6.33e-24	8.42e-23
ANKRD34B	5.0932	1.28497	6.46e-24	8.59e-23
PLA2G2F	5.5675	-1.22031	6.65e-24	8.83e-23
AKR1B15	5.89065	1.9525	6.67e-24	8.85e-23
AP000424.1	3.91195	-2.42705	7.06e-24	9.35e-23
PCP4	5.40901	3.90801	7.12e-24	9.4e-23
H3C12	5.74533	-1.29356	7.53e-24	9.93e-23
RNF186	5.19123	0.01371	8.97e-24	1.17e-22
RNF183	4.19002	1.75432	9.04e-24	1.18e-22
LINC00461	4.20348	-2.05421	9.89e-24	1.29e-22
TPSP2	6.86419	-1.20595	1.02e-23	1.33e-22
PADI1	6.40862	2.34131	1.08e-23	1.41e-22
LINC02474	4.77584	1.05586	1.27e-23	1.64e-22
TFF1	9.32642	5.84575	1.3e-23	1.69e-22
RTBDN	5.10379	-0.132937	1.35e-23	1.74e-22
CDH17	5.32855	3.67375	1.51e-23	1.95e-22
H2BC8	4.08484	1.38362	1.59e-23	2.05e-22
AC120498.4	5.59728	-1.65893	1.69e-23	2.17e-22
EPYC	5.26586	0.33985	1.93e-23	2.46e-22
IL20RB	3.92167	3.24633	1.96e-23	2.5e-22
TRIM15	6.26248	0.734707	2.44e-23	3.1e-22
AC023301.1	4.32673	-0.853579	2.61e-23	3.3e-22
TCN1	6.54059	4.74741	3.15e-23	3.97e-22
GJB6	5.16279	2.07522	3.23e-23	4.07e-22
FUT6	3.95994	2.82343	3.78e-23	4.73e-22
COL17A1	4.24089	6.02426	3.83e-23	4.79e-22
SP8	6.80699	1.1483	4.91e-23	6.07e-22
GLB1L3	5.23312	4.4021	5.17e-23	6.38e-22
MUC13	5.97643	5.93199	5.58e-23	6.87e-22
RPSAP52	5.09713	-0.600816	6.49e-23	7.95e-22
CPHL1P	4.15531	0.116673	6.63e-23	8.11e-22
HMGA2	5.83601	4.12256	6.78e-23	8.28e-22
PGLYRP3	5.66768	-0.421459	7.28e-23	8.88e-22
AC078923.1	4.02608	-1.01257	7.67e-23	9.34e-22
TESC	3.64412	6.29373	8.12e-23	9.87e-22
FRGCA	3.77314	-1.494	9.71e-23	1.17e-21
AC111149.2	4.43681	0.389603	9.83e-23	1.19e-21
TNS4	4.00306	5.15158	1.11e-22	1.34e-21
NRK	3.80019	3.18239	1.12e-22	1.34e-21
MYO3B	3.54731	1.58933	1.21e-22	1.45e-21
MMP3	3.95996	1.15474	1.27e-22	1.52e-21
AC087269.1	3.86928	-0.828803	1.29e-22	1.54e-21
AC011352.3	4.73647	-2.87522	1.31e-22	1.56e-21
VSX1	3.81109	-1.19663	1.36e-22	1.63e-21
PRB3	4.44689	0.355545	1.44e-22	1.72e-21
MIOX	4.06467	0.724235	1.6e-22	1.9e-21
SLC7A10	4.78462	1.60103	1.74e-22	2.06e-21
H1-12P	3.77021	-1.77024	1.78e-22	2.1e-21
H1-3	6.65398	1.1656	2e-22	2.35e-21
ZIC2	5.23657	0.848454	2.08e-22	2.45e-21
IL36G	4.35069	-0.622354	2.3e-22	2.7e-21
AL033397.2	4.15457	-0.677662	2.3e-22	2.7e-21
HOXC13	7.00149	1.06144	2.45e-22	2.87e-21
HGD	3.86284	4.54344	2.57e-22	3.01e-21
LINC01983	3.78375	-0.368183	2.6e-22	3.04e-21
RPL32P33	4.01966	-2.65449	2.61e-22	3.05e-21
CXCL14	4.37101	7.24822	2.66e-22	3.11e-21
GNG4	4.47475	3.42642	2.69e-22	3.14e-21
PRSS3	5.21472	1.99075	2.76e-22	3.22e-21
AKR1B10	7.42788	6.34292	2.85e-22	3.32e-21
UMODL1	4.25581	2.7447	2.89e-22	3.37e-21
HOXB9	7.19721	3.58606	3.17e-22	3.68e-21
OR2B6	3.51177	-2.08823	3.23e-22	3.74e-21
H1-4	5.73223	1.89764	3.37e-22	3.9e-21
AC093895.1	3.62336	-0.572379	3.59e-22	4.15e-21
H3C4	3.53443	0.115936	3.63e-22	4.19e-21
POU4F1	5.38378	0.129447	3.71e-22	4.28e-21
H2BC9	4.70926	0.213416	3.78e-22	4.36e-21
IGKV1-33	4.07529	0.403124	3.84e-22	4.43e-21
SLC25A48	4.23451	-1.58669	4.63e-22	5.32e-21
HOXA10	4.24576	1.71766	4.74e-22	5.43e-21
ABCA4	3.75544	4.40613	5.01e-22	5.74e-21
TUBB2B	3.9889	3.68351	5.04e-22	5.77e-21
LINC00160	3.66077	-1.46617	5.08e-22	5.81e-21
MGAT4EP	3.55998	-2.21201	5.4e-22	6.16e-21
UCN2	4.03282	-0.989799	6.05e-22	6.89e-21
TMEM82	4.80892	-1.14886	6.28e-22	7.15e-21
SLC25A5P5	3.91929	-1.08634	6.42e-22	7.3e-21
XAGE1A	4.61157	-3.04026	6.45e-22	7.32e-21
SHOX2	3.50555	1.25179	6.58e-22	7.45e-21
POU3F2	6.85703	2.09927	7.35e-22	8.28e-21
SMC1B	3.56473	1.11421	7.41e-22	8.34e-21
CT83	6.64584	1.96462	8.24e-22	9.24e-21
CLDN10	4.13777	4.32038	9.13e-22	1.02e-20
FGF19	8.90489	1.3026	9.14e-22	1.02e-20
CPS1	6.70974	7.84062	9.99e-22	1.11e-20
METTL11B	4.6749	-2.7951	1.11e-21	1.23e-20
DMRTA2	5.0687	1.17044	1.23e-21	1.37e-20
SERPINA4	8.14391	1.73165	1.26e-21	1.4e-20
CBY2	4.92001	-0.723132	1.28e-21	1.41e-20
LINC01208	4.18944	-2.80693	1.35e-21	1.49e-20
LY6D	5.72142	3.23315	1.54e-21	1.7e-20
IGF2BP1	6.45855	3.06912	1.63e-21	1.79e-20
AL138789.1	4.8309	-2.42503	1.66e-21	1.82e-20
CASC16	4.28503	-1.98736	1.7e-21	1.86e-20
GAL	5.34833	1.8192	1.74e-21	1.91e-20
H2BC7	5.11462	-0.69839	1.8e-21	1.97e-20
LIPK	6.51629	-1.58852	1.84e-21	2.01e-20
UCA1	5.63981	2.53165	1.85e-21	2.02e-20
H2AC8	3.91914	0.948363	1.89e-21	2.06e-20
KRT83	5.52111	-0.4019	2.09e-21	2.27e-20
ANXA10	7.5784	3.56365	2.2e-21	2.39e-20
AC113346.1	4.22505	-2.83292	2.35e-21	2.54e-20
AL109946.1	4.2984	-2.37305	2.99e-21	3.21e-20
IL17C	4.20001	-0.276388	3.33e-21	3.57e-20
KRT81	5.96194	4.58594	3.6e-21	3.85e-20
C12orf56	4.8361	1.0819	4e-21	4.26e-20
SNORA73B	6.78414	5.00887	4e-21	4.26e-20
AC061975.6	6.54729	-0.886328	4.05e-21	4.31e-20
AL139420.1	4.02446	-2.96127	4.31e-21	4.57e-20
BPIFA2	5.3767	2.36794	4.68e-21	4.95e-20
FOXH1	4.20123	-0.747512	4.94e-21	5.22e-20
FGB	9.00438	7.89403	5.01e-21	5.29e-20
TRIM54	3.73525	1.26857	5.1e-21	5.38e-20
H2BC17	4.8443	-0.572326	6.04e-21	6.35e-20
HORMAD1	4.48163	2.5142	8.46e-21	8.79e-20
CEACAM7	5.41045	3.31228	9.13e-21	9.48e-20
AL645608.2	3.53278	-1.08776	9.72e-21	1.01e-19
LINC01842	3.50345	-0.928122	1.05e-20	1.08e-19
KLK6	6.69895	3.10405	1.06e-20	1.1e-19
APOBEC1	7.14591	-0.305138	1.15e-20	1.18e-19
ABCC2	4.94641	4.36372	1.21e-20	1.24e-19
SPTSSB	4.56165	2.47764	1.32e-20	1.35e-19
TAF7L	4.35888	-0.355156	1.75e-20	1.77e-19
CNGA3	4.86987	2.68595	1.89e-20	1.9e-19
TMEM59L	4.22882	4.54379	2.1e-20	2.11e-19
SEPTIN14P12	3.9517	-3.47535	2.17e-20	2.18e-19
NUS1P2	3.64965	-1.51011	2.28e-20	2.29e-19
KRT16	4.83601	3.92662	2.36e-20	2.36e-19
PCSK1	6.71078	5.62185	2.42e-20	2.42e-19
CRABP1	6.17218	1.9775	2.42e-20	2.42e-19
ITGB1-DT	3.8148	-0.431427	2.46e-20	2.46e-19
FOXB1	4.73614	0.486986	2.62e-20	2.61e-19
GPR87	4.16649	3.36338	2.66e-20	2.65e-19
BECN2	3.99143	-2.88763	3.16e-20	3.13e-19
AL352984.1	3.54019	-2.97645	3.25e-20	3.21e-19
UNC93A	5.77417	-1.25153	3.8e-20	3.75e-19
ANKS4B	6.32079	1.74837	3.88e-20	3.82e-19
LINC01559	6.43841	1.40437	3.96e-20	3.9e-19
BRDT	6.12419	2.67206	4.38e-20	4.29e-19
SOHLH2	4.85967	0.584535	4.66e-20	4.56e-19
SLC15A1	4.07818	1.98908	4.67e-20	4.56e-19
AC007326.1	4.35357	-2.82671	4.71e-20	4.6e-19
PAH	6.16518	2.44176	4.76e-20	4.65e-19
ALB	9.09613	6.62902	5.34e-20	5.2e-19
GLRA3	3.92229	0.899245	5.76e-20	5.6e-19
AC105118.1	4.51155	-1.01447	5.93e-20	5.75e-19
SLCO1B3	6.94762	1.56965	6.34e-20	6.13e-19
NKX3-2	3.57377	-1.16539	6.37e-20	6.17e-19
H2AC7	4.38315	0.0537929	6.68e-20	6.45e-19
PDX1	8.20555	0.461485	7.1e-20	6.84e-19
H1-5	7.50185	1.46969	7.28e-20	7.02e-19
NPC1L1	4.46715	2.24353	7.43e-20	7.15e-19
NKAIN3	5.31861	-1.42102	7.77e-20	7.47e-19
SEPTIN12	4.1117	-3.04563	8.53e-20	8.18e-19
HOXC11	6.84909	1.40755	8.76e-20	8.39e-19
HOTAIR	6.84748	-0.0317328	9.11e-20	8.71e-19
SOX11	4.87282	2.26486	1.16e-19	1.1e-18
SP3P	6.55651	0.39008	1.34e-19	1.27e-18
H2AC9P	4.33953	-3.01203	1.37e-19	1.29e-18
SPINK4	8.97622	3.90551	1.48e-19	1.39e-18
AC016044.1	6.14447	-1.87961	1.85e-19	1.73e-18
CASC9	5.5123	1.80309	1.89e-19	1.76e-18
AC079160.1	6.08681	-1.16016	2.09e-19	1.94e-18
LINC02086	3.97088	0.112436	2.1e-19	1.95e-18
LINC00460	4.31391	1.44095	2.13e-19	1.98e-18
RNU6-438P	4.34416	-3.5897	2.28e-19	2.11e-18
EPS8L3	7.25647	2.84916	2.52e-19	2.32e-18
AC089983.1	4.2532	-0.819259	2.57e-19	2.36e-18
SMIM24	4.26426	1.40173	2.68e-19	2.46e-18
REG4	10.6982	5.94147	2.75e-19	2.52e-18
NR2E1	4.50336	-1.48476	2.9e-19	2.66e-18
AP005435.1	4.17925	-1.47234	3.01e-19	2.76e-18
H2BC6	4.25884	-0.650084	3.66e-19	3.32e-18
BARX1-DT	6.52833	-0.692138	3.67e-19	3.33e-18
TFPI2-DT	4.07862	-2.02637	3.91e-19	3.54e-18
TDRD5	3.71266	1.7875	3.96e-19	3.59e-18
AC254629.1	4.06573	-1.63641	4.02e-19	3.64e-18
MUC21	3.80701	6.47705	4.41e-19	3.97e-18
AC004870.2	4.48602	-1.01903	4.73e-19	4.26e-18
AC092868.1	3.97633	0.750237	5.77e-19	5.17e-18
H4C5	5.30321	0.718718	5.89e-19	5.27e-18
CLPSL1	4.88526	-1.44753	6.97e-19	6.2e-18
CLDN6	5.74171	4.30197	7.6e-19	6.73e-18
RN7SL3	5.62437	3.67861	7.87e-19	6.96e-18
TRPM2-AS	3.52337	0.284846	8.07e-19	7.13e-18
CRLF1	4.08753	7.01599	8.1e-19	7.15e-18
AC084262.1	3.8112	-2.43022	9.44e-19	8.3e-18
HOXC13-AS	5.97048	-1.17394	9.47e-19	8.32e-18
LINC02122	4.68414	-1.53007	9.64e-19	8.47e-18
HOXC10	6.0923	2.7025	9.83e-19	8.63e-18
TCAM1P	4.53053	0.46285	1.08e-18	9.45e-18
AC026785.3	7.16696	-0.907222	1.24e-18	1.08e-17
EN2	4.18067	-0.400591	1.28e-18	1.12e-17
LINC02163	5.98385	-1.78721	1.39e-18	1.21e-17
PDIA2	4.78353	2.32591	1.48e-18	1.28e-17
CYP4F23P	4.72389	-1.6473	1.52e-18	1.32e-17
CDHR2	4.18128	2.23135	1.67e-18	1.44e-17
NCCRP1	3.81488	2.96428	1.81e-18	1.56e-17
AP005230.1	3.87112	-1.19304	1.82e-18	1.57e-17
LINC02313	4.47124	-1.75174	1.82e-18	1.57e-17
COBLP1	4.1983	-3.16182	1.92e-18	1.65e-17
H2AC14	6.56781	-1.06172	1.98e-18	1.71e-17
KIF1A	5.54023	5.10921	2.01e-18	1.73e-17
CCDC198	5.3936	0.742413	2.28e-18	1.95e-17
SNORD17	5.64445	3.01943	2.5e-18	2.14e-17
UGT2B15	6.09844	2.14348	2.67e-18	2.28e-17
LINC01597	4.18858	1.249	2.75e-18	2.34e-17
LINC02029	4.03032	-2.42195	3.02e-18	2.56e-17
AC103740.2	3.78485	-2.66992	3.06e-18	2.6e-17
TEX48	3.64885	-2.40855	3.11e-18	2.64e-17
LINC02133	4.33149	-1.22476	3.17e-18	2.68e-17
SNORA14B	3.61091	-1.81388	3.2e-18	2.71e-17
MYCN	4.04683	2.54601	3.61e-18	3.05e-17
AC010789.1	5.47575	-1.87094	3.65e-18	3.08e-17
LINC00858	5.12628	0.271248	3.65e-18	3.08e-17
BPIFB4	6.65792	0.872041	3.88e-18	3.27e-17
TBXT	5.91886	0.222536	4.07e-18	3.42e-17
LINC02783	5.0209	-1.46052	4.22e-18	3.55e-17
TRIM51BP	5.11134	-1.94703	4.37e-18	3.66e-17
H3C8	3.76108	-0.01604	4.41e-18	3.7e-17
AL139420.2	4.07972	-3.72858	4.98e-18	4.15e-17
AC010328.1	3.5582	-1.97107	5.17e-18	4.31e-17
FADS6	5.1604	0.161071	5.26e-18	4.37e-17
SMOC1	3.89065	4.5025	5.32e-18	4.42e-17
SYT14	4.97373	0.514156	5.36e-18	4.46e-17
FAM133A	5.55934	2.1916	5.58e-18	4.63e-17
LINC00501	5.34752	-0.886468	6.04e-18	4.99e-17
MMP10	3.97363	2.999	6.21e-18	5.12e-17
HOXB13	6.41976	1.41541	6.7e-18	5.52e-17
TM4SF4	5.83921	5.36153	6.98e-18	5.74e-17
PTPRN	4.44319	2.37962	7.08e-18	5.82e-17
TFAP2D	7.05777	0.513435	7.28e-18	5.98e-17
H2AC16	5.45659	-1.39976	7.6e-18	6.23e-17
TBX10	5.25663	-1.14647	7.94e-18	6.5e-17
AC103702.2	4.39693	0.352065	7.99e-18	6.53e-17
DRAIC	3.81673	3.25935	8.4e-18	6.85e-17
LINC01926	3.52149	-3.19346	9.88e-18	8.01e-17
MIR4713HG	4.15986	-2.40245	1.02e-17	8.29e-17
7SK	7.12314	6.5553	1.03e-17	8.35e-17
FOXD3	4.00913	-1.55071	1.05e-17	8.49e-17
AC011298.1	7.10193	0.183094	1.06e-17	8.54e-17
AC009262.1	4.3844	-3.42862	1.14e-17	9.18e-17
PRSS2	6.21187	5.08298	1.14e-17	9.18e-17
LINC00973	6.12909	0.714757	1.38e-17	1.1e-16
SCARNA21	5.65038	0.729382	1.54e-17	1.23e-16
CHGB	5.9146	5.38744	1.77e-17	1.4e-16
PIWIL1	5.14584	-1.05679	1.79e-17	1.41e-16
NXPH1	5.11388	-1.42753	1.91e-17	1.51e-16
TINAG	6.79765	0.34176	2.04e-17	1.61e-16
LINC00707	4.51465	0.569788	2.07e-17	1.63e-16
ANGPTL3	3.95566	-1.23215	2.11e-17	1.66e-16
LINC01748	4.91444	-0.207586	2.35e-17	1.84e-16
MAFA-AS1	4.23967	-1.58441	2.39e-17	1.87e-16
CSTL1	4.65262	-2.26518	2.39e-17	1.87e-16
TUBAP13	5.1795	-1.69136	2.4e-17	1.87e-16
LCT	4.01302	0.43324	2.47e-17	1.92e-16
TRIM72	4.35187	1.17445	2.49e-17	1.94e-16
DLX6-AS1	4.673	0.593212	2.55e-17	1.99e-16
SLC39A5	4.00993	0.823254	2.7e-17	2.1e-16
F2	7.25468	0.950811	2.74e-17	2.13e-16
AC020891.2	4.45748	-2.54867	2.77e-17	2.16e-16
AC117386.2	4.80668	-2.00349	2.92e-17	2.27e-16
AC116049.1	5.24464	-2.72758	3.33e-17	2.57e-16
H4C3	6.00569	0.682255	3.47e-17	2.67e-16
ARL14	5.13985	1.8734	3.74e-17	2.87e-16
DLX6	4.92718	-0.0365036	3.76e-17	2.88e-16
MYBPC1	5.94622	2.68891	3.86e-17	2.95e-16
SCARNA6	5.38127	1.74674	4.2e-17	3.21e-16
AL139023.1	6.39151	-1.9848	4.2e-17	3.21e-16
AL356274.2	5.27284	-1.8421	4.31e-17	3.28e-16
FBXO36P1	3.86127	-2.42293	4.66e-17	3.54e-16
TMEM75	4.33405	-1.19218	5.23e-17	3.95e-16
SNORA71A	4.12926	-0.0407747	5.37e-17	4.05e-16
CALCA	8.56933	7.76526	5.5e-17	4.14e-16
H2BC14	6.30874	-1.74799	5.95e-17	4.46e-16
MUC6	6.39417	6.1192	6.23e-17	4.66e-16
NAALADL2-AS2	5.35136	-0.973948	6.27e-17	4.69e-16
AC083809.1	5.02703	1.26355	6.39e-17	4.78e-16
IGKV1D-33	4.14831	-0.191534	6.63e-17	4.95e-16
KRT6A	5.5444	6.59302	7.25e-17	5.38e-16
SERPINB5	4.47274	3.99262	7.28e-17	5.41e-16
MTNR1A	3.7033	-2.10618	7.67e-17	5.68e-16
TM4SF5	8.27816	1.73727	7.71e-17	5.7e-16
LHX5	5.14533	-1.02561	7.81e-17	5.77e-16
C4orf54	3.81559	0.208322	7.92e-17	5.85e-16
IGLVI-70	3.77423	-0.0555852	8.14e-17	6e-16
SPRR1B	6.13787	3.07129	8.45e-17	6.23e-16
ITPRID1	4.58192	1.99785	8.57e-17	6.31e-16
TFPI2	3.90653	7.49979	8.67e-17	6.38e-16
SALL1	5.80373	1.02209	8.79e-17	6.46e-16
AL355596.1	5.16544	-0.256561	9.35e-17	6.86e-16
GABRA3	6.02715	1.332	1.01e-16	7.42e-16
TFF2	11.6592	5.62365	1.08e-16	7.86e-16
KIRREL2	3.66799	0.420616	1.08e-16	7.87e-16
H2BC13	3.87578	-0.892021	1.14e-16	8.33e-16
ELFN1-AS1	3.87301	-0.277052	1.16e-16	8.42e-16
AC073316.2	3.88888	-1.79254	1.17e-16	8.51e-16
PRSS1	6.12018	2.09131	1.19e-16	8.66e-16
CHRNA9	5.16331	2.10584	1.24e-16	8.96e-16
HOXC-AS3	5.84274	-1.11672	1.24e-16	9.02e-16
LINC00466	4.3115	-3.1903	1.28e-16	9.24e-16
LY6K	3.71214	3.4631	1.28e-16	9.26e-16
LHX1	6.7539	-0.253175	1.31e-16	9.49e-16
LINC02588	5.79048	-0.382966	1.44e-16	1.04e-15
HNF1A	3.85997	1.17979	1.49e-16	1.07e-15
SPINK13	3.76593	1.01644	1.5e-16	1.08e-15
NMRAL2P	3.54242	2.44589	1.5e-16	1.08e-15
AC093281.2	4.24439	-2.97442	1.53e-16	1.1e-15
LYPD8	4.21787	-0.716718	1.58e-16	1.13e-15
AC090164.3	3.78045	-2.62903	1.71e-16	1.22e-15
LINC01214	5.80877	-1.38941	1.88e-16	1.34e-15
OR13Z2P	4.33259	-3.25301	1.89e-16	1.35e-15
ERVV-1	4.48823	-1.74369	1.91e-16	1.36e-15
PADI3	6.92816	2.3012	2.11e-16	1.49e-15
IGKV2D-28	3.9941	-0.631254	2.12e-16	1.5e-15
IGBP1P4	3.75157	-1.92496	2.12e-16	1.5e-15
CRYBA2	5.25229	-1.35248	2.26e-16	1.6e-15
KIF3AP1	3.56069	-2.02308	2.43e-16	1.71e-15
GCGR	3.55625	-1.97421	2.46e-16	1.73e-15
AC018641.1	4.0749	-2.26094	2.46e-16	1.73e-15
FETUB	5.8051	-1.77988	2.48e-16	1.74e-15
CYCSP6	5.55309	-1.62417	2.71e-16	1.9e-15
FOXE1	4.46009	1.81845	2.72e-16	1.9e-15
TF	4.78482	5.468	3.15e-16	2.19e-15
SNRPCP1	5.21582	-2.49733	3.15e-16	2.19e-15
GFY	5.98629	-0.903512	3.15e-16	2.19e-15
AC090954.1	3.63364	-3.0491	3.4e-16	2.36e-15
ACTL8	7.83049	0.204295	3.43e-16	2.38e-15
CDK5R2	4.42669	0.568306	3.73e-16	2.58e-15
SCARNA13	4.42645	2.04206	3.82e-16	2.63e-15
AKR1C2	4.66629	8.33765	3.85e-16	2.66e-15
ERVH48-1	4.7114	2.29011	4.22e-16	2.9e-15
SCARNA12	4.02285	-0.195612	4.23e-16	2.9e-15
LINC01529	4.04102	-1.7386	4.37e-16	3e-15
NPTX1	3.78296	4.9787	4.4e-16	3.01e-15
ZIC5	5.46843	-0.703417	4.69e-16	3.21e-15
MUC5B	4.03276	9.4466	4.71e-16	3.22e-15
LINP1	4.24982	0.28416	4.86e-16	3.32e-15
SLC6A3	4.04164	3.17355	5.17e-16	3.52e-15
IGKV1-13	3.53541	-0.763304	5.28e-16	3.59e-15
PPY2P	5.38818	-2.60568	5.48e-16	3.73e-15
FGF5	5.76997	-0.231191	5.73e-16	3.89e-15
CSAG1	7.20181	1.84368	5.75e-16	3.9e-15
AC010329.2	5.25054	-2.30566	5.94e-16	4.03e-15
AC105290.1	5.12005	-1.64501	6.04e-16	4.09e-15
AL391427.1	3.97584	-0.146196	6.18e-16	4.18e-15
SULT4A1	3.8883	0.226269	6.29e-16	4.25e-15
PRAP1	4.46963	1.49529	6.46e-16	4.36e-15
UGT2B11	7.32388	0.347216	6.92e-16	4.67e-15
TLX1	5.32071	-2.08569	6.97e-16	4.69e-15
SLC28A2	4.45701	2.40221	7.5e-16	5.04e-15
CDX2	5.53516	0.118249	7.81e-16	5.24e-15
ELAVL2	3.50578	0.0499014	7.95e-16	5.33e-15
FAR2P1	6.34068	0.712074	8.44e-16	5.64e-15
RIMS2	3.86852	1.2725	8.75e-16	5.85e-15
LINC02475	4.00719	-0.531816	8.76e-16	5.85e-15
KCNQ2	5.37428	0.782795	9.99e-16	6.64e-15
AL513123.1	5.14888	-2.81552	1.11e-15	7.37e-15
PNPLA5	5.865	-1.59988	1.14e-15	7.51e-15
AC025575.2	5.06072	-0.128803	1.19e-15	7.87e-15
CALB1	5.71103	3.53041	1.2e-15	7.9e-15
SNORA53	5.10616	1.20399	1.22e-15	8.06e-15
AC092969.1	3.92239	-1.40422	1.38e-15	9.01e-15
MAGEC1	8.02348	1.27592	1.47e-15	9.58e-15
LNCAROD	5.83354	-1.22263	1.49e-15	9.71e-15
RASGEF1C	3.79476	-0.611	1.5e-15	9.75e-15
AC122134.1	5.47928	-2.15369	1.52e-15	9.91e-15
MYBPH	3.75922	2.10848	1.58e-15	1.03e-14
AC010275.1	4.76315	-2.22555	1.59e-15	1.04e-14
AL133284.1	4.96481	-0.949662	1.67e-15	1.08e-14
AC012213.1	5.36154	-2.00066	1.68e-15	1.09e-14
MYH6	4.07235	-2.75197	1.73e-15	1.12e-14
LINC00491	5.62616	-0.873026	1.94e-15	1.25e-14
PNMA5	5.59308	1.68735	2.12e-15	1.37e-14
CGA	8.90805	3.6527	2.14e-15	1.37e-14
CALCB	4.22002	0.3023	2.18e-15	1.4e-14
AC090192.2	4.41455	-2.72543	2.4e-15	1.53e-14
SNORD15B	4.33492	0.285707	2.5e-15	1.59e-14
INSL4	8.17423	2.24916	2.51e-15	1.6e-14
CALML3	6.11834	2.12089	2.65e-15	1.69e-14
AL731684.1	3.98265	-2.94946	2.69e-15	1.71e-14
LINC01234	5.46198	0.311769	2.85e-15	1.81e-14
THRA1/BTR	4.64225	-1.77626	2.88e-15	1.83e-14
PRDM13	5.32109	-2.23405	2.92e-15	1.85e-14
COL25A1	4.46	3.03111	2.95e-15	1.87e-14
LINC01305	5.18044	-2.12432	3.07e-15	1.94e-14
AC012501.2	5.208	-3.05321	3.11e-15	1.97e-14
H4C4	5.45287	0.0617835	3.12e-15	1.97e-14
AC114489.1	4.04252	-2.74636	3.15e-15	1.99e-14
AC135068.9	3.92379	-2.01609	3.36e-15	2.12e-14
AL356234.2	4.26137	-2.04638	3.65e-15	2.29e-14
LINC01287	5.88351	0.779732	3.78e-15	2.37e-14
AC129507.4	3.61273	0.489317	3.88e-15	2.43e-14
INA	4.19774	1.77376	4.04e-15	2.52e-14
POU6F2	4.02693	2.17967	4.21e-15	2.63e-14
TEX55	3.70388	-2.11271	4.25e-15	2.65e-14
AC012531.1	3.61991	-1.87667	4.33e-15	2.7e-14
AL117329.1	5.69498	-2.20402	4.34e-15	2.71e-14
KHDC1L	5.37061	-0.799326	4.46e-15	2.78e-14
AC005537.1	3.61041	-0.697079	4.58e-15	2.85e-14
SUN3	4.0476	0.0312223	4.59e-15	2.85e-14
HOXA13	6.48183	-0.195965	4.73e-15	2.94e-14
POU6F2-AS2	6.22787	-1.47537	5.03e-15	3.11e-14
KLK12	6.17324	5.10235	5.16e-15	3.19e-14
AC010595.1	5.59739	-2.39922	5.31e-15	3.28e-14
SLCO1B1	6.34348	-1.18512	5.56e-15	3.43e-14
AL136981.1	4.28935	-2.01654	5.59e-15	3.44e-14
IVL	4.35256	3.09614	5.85e-15	3.59e-14
AFP	8.54491	2.4049	5.93e-15	3.65e-14
AKR1C4	5.07331	1.01447	5.98e-15	3.67e-14
H3C7	6.75424	-0.734676	6.06e-15	3.72e-14
LINC02418	7.55783	1.58482	6.13e-15	3.76e-14
OLFM4	6.48932	3.89085	6.14e-15	3.76e-14
SNORA23	6.81377	1.18678	6.58e-15	4.02e-14
AL133370.1	5.5267	-0.395448	6.63e-15	4.05e-14
MIR137HG	4.97463	-1.74407	6.89e-15	4.2e-14
AC034206.1	3.70648	-2.50645	7.34e-15	4.46e-14
AC010329.5	4.95155	-2.23277	7.36e-15	4.48e-14
KRT3	3.57555	-1.79781	7.47e-15	4.54e-14
HOXA11-AS	4.39814	-1.39149	7.6e-15	4.62e-14
AC011352.1	3.55833	-3.46379	7.78e-15	4.72e-14
A2ML1	4.70223	2.25872	7.81e-15	4.74e-14
MAGEA3	8.18861	3.16066	9.62e-15	5.79e-14
LINC01611	5.61619	-2.62812	9.67e-15	5.81e-14
AC131009.2	3.76388	-2.97012	9.73e-15	5.85e-14
SLC6A11	3.76681	0.92755	9.87e-15	5.93e-14
AC026462.3	5.30769	-2.42329	1.05e-14	6.29e-14
PLK5	3.57063	-2.51746	1.17e-14	7.01e-14
TMPRSS11D	4.25266	-0.444399	1.26e-14	7.49e-14
RPS16P9	4.73154	-2.17943	1.3e-14	7.75e-14
AC040174.1	4.43928	-2.04639	1.32e-14	7.86e-14
LINC02830	4.92267	-1.54298	1.33e-14	7.89e-14
AC125603.2	4.82354	0.690802	1.63e-14	9.62e-14
EPHA8	3.93569	-2.0647	1.66e-14	9.8e-14
LINC01213	3.92634	-2.68216	1.73e-14	1.02e-13
AC005993.1	4.76715	-1.41075	1.83e-14	1.08e-13
FABP7	5.8591	1.92158	1.86e-14	1.1e-13
SYNPR	4.48619	-2.11659	1.86e-14	1.1e-13
AL022324.3	3.59938	-3.39803	1.88e-14	1.1e-13
COL2A1	5.70882	3.64185	1.88e-14	1.11e-13
SLCO1B3-SLCO1B7	5.41616	-2.90797	1.89e-14	1.11e-13
BPIFA1	5.2425	8.80758	1.93e-14	1.13e-13
LINC01518	5.9475	-2.06498	1.93e-14	1.13e-13
AP003500.1	4.03555	-2.97819	1.93e-14	1.13e-13
ONECUT3	5.8572	0.592024	1.98e-14	1.16e-13
CELF3	4.54308	1.60715	2.08e-14	1.21e-13
AC010343.3	4.10456	-2.44319	2.12e-14	1.24e-13
AC114803.1	4.10406	-3.71666	2.18e-14	1.27e-13
ALG1L3P	3.94132	-1.94636	2.2e-14	1.28e-13
H4C2	5.45673	-0.568927	2.35e-14	1.37e-13
AF127577.3	6.0324	-1.50503	2.36e-14	1.37e-13
USH1C	4.00734	2.60425	2.36e-14	1.37e-13
SCARNA5	6.78364	3.21459	2.51e-14	1.46e-13
H2AC4	5.74649	-1.28842	2.77e-14	1.61e-13
AC108451.2	4.0236	-1.23913	2.83e-14	1.64e-13
HRG	4.84976	-1.35589	3.03e-14	1.75e-13
LINC02428	4.33613	-2.44335	3.14e-14	1.81e-13
NCAPD2P1	4.2921	-1.87581	3.2e-14	1.84e-13
MUC2	5.80814	2.55915	3.21e-14	1.85e-13
NTSR1	4.68004	1.2615	3.25e-14	1.87e-13
AC092484.1	5.03961	-1.55364	3.41e-14	1.96e-13
H2AC21	5.17929	-0.796148	3.83e-14	2.19e-13
WNT16	3.9879	1.63199	4.05e-14	2.32e-13
MAGEA8	5.51891	0.330389	4.26e-14	2.43e-13
SCARNA10	6.45067	2.43377	4.28e-14	2.44e-13
RETNLB	4.30984	-2.73135	4.31e-14	2.46e-13
HOXC12	8.18693	1.02194	4.35e-14	2.47e-13
EVX1	5.13502	-2.24111	4.39e-14	2.5e-13
GCNT1P4	4.10313	-3.41273	4.57e-14	2.6e-13
SCARNA22	3.91973	-2.35457	4.7e-14	2.67e-13
IGFL2-AS1	4.15715	-0.993915	4.88e-14	2.77e-13
FP325330.3	4.71314	-3.20757	5.51e-14	3.11e-13
IGKV2-40	4.45547	-2.9531	5.57e-14	3.14e-13
KCNK9	3.82764	-0.399055	5.71e-14	3.21e-13
NFE4	4.3159	1.07444	5.77e-14	3.25e-13
AC026355.3	4.65103	-3.16258	5.88e-14	3.31e-13
KRT20	7.77275	4.1524	5.96e-14	3.35e-13
AC027627.1	3.78755	-3.65948	6.22e-14	3.49e-13
SALL3	5.52482	-0.135654	6.53e-14	3.66e-13
SNORA38B	4.14117	-2.15028	6.56e-14	3.67e-13
LINC00682	5.30072	-2.65475	6.81e-14	3.81e-13
CALY	4.02172	0.603708	7.46e-14	4.16e-13
AC090125.1	3.93072	-3.23202	7.52e-14	4.19e-13
ZMAT4	4.85877	0.62192	7.8e-14	4.33e-13
SYT13	4.22032	4.0668	8.06e-14	4.47e-13
AC116345.1	5.13222	-1.05156	8.19e-14	4.55e-13
C1QL2	5.00632	1.39452	8.64e-14	4.79e-13
H2BC10	6.42051	-0.918576	8.87e-14	4.9e-13
SBSN	4.42331	1.04347	9.18e-14	5.07e-13
LINC00518	4.38326	-3.42342	9.29e-14	5.13e-13
SLC5A5	3.5663	2.27377	9.59e-14	5.29e-13
AL589642.2	4.6212	-3.32776	9.66e-14	5.33e-13
RAET1L	4.07218	-1.86432	9.87e-14	5.43e-13
NLRP11	4.26515	-0.285039	9.96e-14	5.48e-13
ETNPPL	6.22561	0.595748	9.98e-14	5.49e-13
A1CF	4.51496	-0.29615	1e-13	5.5e-13
CA10	4.96516	1.37108	1.04e-13	5.69e-13
CALML5	7.50288	2.53605	1.05e-13	5.75e-13
LINC02866	4.59165	1.16074	1.08e-13	5.89e-13
AL136114.1	3.9172	-2.8514	1.09e-13	5.95e-13
C6orf15	5.78825	-1.08259	1.09e-13	5.96e-13
ADGRG7	6.37665	-0.631324	1.09e-13	5.99e-13
LINC00676	10.0822	2.11152	1.1e-13	6.02e-13
RN7SL4P	3.81154	2.2272	1.17e-13	6.37e-13
CNTNAP4	4.5377	-1.45957	1.32e-13	7.17e-13
PAX7	6.48141	3.41894	1.32e-13	7.2e-13
LINC00567	3.87148	-1.15503	1.43e-13	7.76e-13
RNU4-1	7.27396	2.65602	1.53e-13	8.26e-13
ERVV-2	5.66776	-2.06919	1.58e-13	8.54e-13
CDK8P2	4.23379	-1.99048	1.59e-13	8.58e-13
TEX19	4.66915	-0.491499	1.61e-13	8.68e-13
PLAC4	4.55639	2.62528	1.63e-13	8.8e-13
SLC9A4	5.69246	0.307143	1.63e-13	8.81e-13
KRT75	6.32829	0.348554	1.67e-13	8.98e-13
SNORA79B	5.02718	0.419685	1.84e-13	9.93e-13
SERPINB4	5.0484	1.01257	1.85e-13	9.97e-13
AC012213.4	4.87844	-2.31846	1.96e-13	1.05e-12
MAGEA12	7.38798	2.27856	1.98e-13	1.06e-12
THEG	3.51071	-1.25687	2.11e-13	1.12e-12
AF015262.1	3.5768	-3.60221	2.2e-13	1.17e-12
SOHLH1	5.49956	-1.74228	2.21e-13	1.18e-12
MAGEC2	7.80392	1.78023	2.28e-13	1.21e-12
GABRQ	3.51597	-0.860559	2.31e-13	1.23e-12
AC106799.1	4.58655	-3.45269	2.35e-13	1.25e-12
AC007368.1	4.19177	-1.14253	2.37e-13	1.26e-12
GLYATL2	4.5718	0.828185	2.4e-13	1.27e-12
RNU4-2	6.98834	4.27982	2.42e-13	1.28e-12
MAGEA6	8.14515	2.83877	2.44e-13	1.3e-12
VSIG1	3.54961	5.9123	2.45e-13	1.3e-12
AC012354.7	3.85705	-3.72304	2.54e-13	1.34e-12
MAGEA10	7.83419	1.87725	2.72e-13	1.44e-12
H4C1	5.31383	-1.75403	2.75e-13	1.45e-12
ANKRD40CL	4.27678	-2.28771	3e-13	1.58e-12
ASNSP1	6.39902	-1.40771	3.01e-13	1.58e-12
LINC01633	5.04024	-3.00212	3.09e-13	1.62e-12
SLC14A2	4.22681	2.8046	3.17e-13	1.66e-12
H3C1	3.81409	-1.43888	3.18e-13	1.67e-12
LINC01807	5.06687	-2.01313	3.25e-13	1.7e-12
AC106785.2	6.10177	-2.07971	3.31e-13	1.73e-12
MIA	3.99503	0.565582	3.45e-13	1.8e-12
DMRT1	4.34775	-2.27302	3.54e-13	1.85e-12
BCAR4	6.42312	-0.201222	3.59e-13	1.87e-12
SNORA12	4.81999	0.47762	3.69e-13	1.92e-12
PANCR	5.64407	-2.58167	3.88e-13	2.01e-12
ZNF280A	5.1441	-2.05836	3.95e-13	2.05e-12
LINC02490	4.94926	-3.05375	3.99e-13	2.07e-12
H2AC12	5.47378	-1.06499	4e-13	2.08e-12
SNORA71D	7.02717	-0.839092	4.33e-13	2.23e-12
H3C11	5.83119	-1.38134	4.41e-13	2.27e-12
AC087273.1	3.89543	-3.62631	4.47e-13	2.3e-12
C10orf90	3.87545	-1.63201	4.87e-13	2.5e-12
AP003900.1	5.90671	-2.53821	4.9e-13	2.52e-12
CDHR5	3.65049	1.9697	4.92e-13	2.53e-12
AP000696.1	4.09379	-3.11698	4.98e-13	2.55e-12
SSTR5-AS1	5.22197	-1.0631	5.02e-13	2.57e-12
AMBP	3.57299	3.60183	5.1e-13	2.61e-12
FAR2P4	5.71292	-1.16488	5.2e-13	2.66e-12
SPRR2D	4.95261	1.8485	5.58e-13	2.84e-12
HOXB8	3.52946	1.63702	5.77e-13	2.93e-12
LBP	4.96619	3.00721	5.83e-13	2.97e-12
PRAC2	5.15686	-2.0769	6.04e-13	3.07e-12
AC096656.1	5.18526	-2.82452	6.63e-13	3.36e-12
ALX3	4.87305	-2.04788	6.7e-13	3.39e-12
LINC01511	5.78818	0.285895	6.88e-13	3.48e-12
DSG4	4.70224	-2.54953	7.17e-13	3.62e-12
KCNU1	6.38689	-0.725275	7.27e-13	3.66e-12
KLF2P1	5.84472	-1.93432	7.64e-13	3.84e-12
WDR87	4.14314	0.109306	7.98e-13	4.01e-12
DMRTC2	5.51109	-1.22905	8.37e-13	4.19e-12
SLC38A8	4.29904	-0.596677	8.54e-13	4.28e-12
LIN28B	7.74201	-0.180122	8.86e-13	4.43e-12
AL133325.3	5.62092	-2.29839	9.09e-13	4.54e-12
AHSG	3.98397	-2.33923	9.25e-13	4.62e-12
LINC01385	5.25871	-2.84053	9.57e-13	4.77e-12
LIN28A	6.34572	0.0110784	9.64e-13	4.8e-12
KCNC2	6.00465	-0.415749	9.67e-13	4.82e-12
SLC18A3	6.42063	-1.19597	1.19e-12	5.86e-12
CGB5	7.49107	0.771078	1.29e-12	6.33e-12
ADAMTS20	4.57041	-1.27228	1.32e-12	6.49e-12
B4GALNT2	3.70786	3.08354	1.33e-12	6.53e-12
TAC3	5.0834	0.0974708	1.44e-12	7.06e-12
SNORA74B	5.22797	-0.320801	1.51e-12	7.38e-12
H2BC3	6.23707	-1.01314	1.53e-12	7.5e-12
POU6F2-AS1	4.465	-3.31488	1.57e-12	7.65e-12
LINC00824	4.35268	-0.454428	1.58e-12	7.7e-12
HOXD11	5.80445	-1.58952	1.6e-12	7.78e-12
OR13K1P	3.51511	-3.39535	1.66e-12	8.08e-12
AL033397.1	5.65697	2.71922	1.71e-12	8.33e-12
AC106799.2	5.12068	-2.53951	1.75e-12	8.5e-12
AC023421.1	4.93059	2.73347	1.82e-12	8.8e-12
UGT1A10	7.62144	0.922951	1.83e-12	8.89e-12
AC106799.3	5.18633	-1.62706	1.86e-12	9.02e-12
NGB	5.58371	-1.84376	1.87e-12	9.07e-12
SLCO1B7	5.58329	-2.79502	2e-12	9.66e-12
TM4SF20	6.35183	1.44616	2e-12	9.67e-12
HOXA10-AS	4.21367	-2.84399	2.05e-12	9.88e-12
FOXL2NB	4.35139	-2.57297	2.08e-12	1e-11
UGT1A6	4.64118	3.23012	2.09e-12	1.01e-11
C20orf141	4.48633	-3.39579	2.09e-12	1.01e-11
MIR548XHG	6.3662	-1.68208	2.12e-12	1.02e-11
AKR1B10P1	5.78017	-1.44801	2.22e-12	1.07e-11
MYCNOS	3.71812	-2.18114	2.32e-12	1.11e-11
CA6	4.26061	-0.619546	2.49e-12	1.19e-11
MYPN	3.85224	-0.961561	2.56e-12	1.22e-11
AC138305.1	3.51029	-2.65593	2.66e-12	1.27e-11
AC069277.1	4.21765	-1.7	2.7e-12	1.29e-11
AC093833.1	3.52311	-3.98083	2.7e-12	1.29e-11
AC093515.1	4.40451	-2.75692	2.75e-12	1.31e-11
AC100826.1	5.20044	-0.411152	2.8e-12	1.33e-11
AC079466.1	7.0802	-0.540796	2.88e-12	1.37e-11
AL606970.1	4.41689	-1.53506	2.93e-12	1.39e-11
LINC00251	4.22177	-3.65472	2.94e-12	1.39e-11
MIR2052HG	3.71435	-1.72112	2.99e-12	1.42e-11
LINC01804	4.95659	-1.8114	3.08e-12	1.46e-11
AC087379.1	3.8813	-2.58983	3.13e-12	1.48e-11
AC012354.2	3.62192	-3.57949	3.2e-12	1.51e-11
SP9	5.92251	-1.82837	3.22e-12	1.52e-11
GDA	3.54205	1.90533	3.24e-12	1.53e-11
HOXA11	4.24274	-0.775033	3.28e-12	1.55e-11
MAGEA11	7.12598	-0.69727	3.38e-12	1.59e-11
IGFL3	4.06927	-2.64196	3.55e-12	1.67e-11
AC011632.1	4.94804	-0.859834	3.6e-12	1.69e-11
LINC02466	5.22322	-3.04306	3.66e-12	1.72e-11
LINC01194	6.19537	-0.617644	3.7e-12	1.74e-11
OR10H1	4.00593	-3.15903	3.74e-12	1.75e-11
LINC01687	4.53482	-3.47069	3.82e-12	1.79e-11
TMPRSS11A	4.07318	-1.93795	3.9e-12	1.82e-11
PURPL	4.10384	-0.69702	4.05e-12	1.89e-11
CPN1	7.77568	-0.767087	4.12e-12	1.92e-11
LINC01980	6.19446	-0.403505	4.32e-12	2.01e-11
LGALS4	3.96783	5.79129	4.34e-12	2.02e-11
UGT2B28	4.99547	-2.53662	4.39e-12	2.04e-11
AC091133.5	3.8421	-3.24687	4.42e-12	2.05e-11
ISL1	4.25576	0.0220864	4.48e-12	2.08e-11
AL139095.3	4.02113	-3.14025	4.59e-12	2.13e-11
LHX1-DT	5.61633	-1.84248	4.63e-12	2.15e-11
LINC02616	6.01195	-1.46506	4.75e-12	2.2e-11
MRPL45P1	4.69883	-3.37512	4.76e-12	2.21e-11
C8orf74	4.62574	-1.87102	4.83e-12	2.24e-11
OBP2A	4.3442	0.0547762	4.83e-12	2.24e-11
LINC02109	4.55638	-2.41438	5.06e-12	2.34e-11
AP000859.1	4.1659	-3.68611	5.21e-12	2.4e-11
INSM1	4.48188	2.12413	5.35e-12	2.46e-11
AC003092.1	5.27562	-0.895159	5.41e-12	2.49e-11
IGKV3OR2-5	3.74303	-2.84632	5.51e-12	2.54e-11
LINC02178	5.74654	-2.49663	5.62e-12	2.58e-11
AL023755.1	3.61044	-3.67413	5.7e-12	2.62e-11
NSG2	4.7257	1.39821	5.87e-12	2.7e-11
AP000829.1	3.5599	-2.54718	6.18e-12	2.83e-11
AL121904.1	3.67135	-1.58873	6.41e-12	2.93e-11
KRTAP2-3	3.95179	-2.63924	6.42e-12	2.94e-11
REG1A	7.64437	2.90146	6.54e-12	2.99e-11
LINC02293	4.54636	-2.25761	6.56e-12	3e-11
PSG1	8.10002	-0.458737	6.69e-12	3.05e-11
BNIP3P42	3.66775	-2.94073	6.88e-12	3.14e-11
FOXL2	4.42445	-1.93449	6.98e-12	3.18e-11
IGFL1P2	5.07577	-3.03915	7.06e-12	3.22e-11
COX7B2	7.55299	-0.469399	7.27e-12	3.31e-11
AC114316.1	3.52494	-1.8416	7.85e-12	3.56e-11
MAGEC3	3.91247	-1.46207	7.9e-12	3.58e-11
AC097512.1	5.10829	-2.97771	7.91e-12	3.59e-11
MAGEA9B	6.99888	-1.62811	8.18e-12	3.7e-11
LINC01299	5.46228	-2.31076	8.21e-12	3.71e-11
DSCAM-AS1	7.82136	3.79133	8.27e-12	3.74e-11
AC007848.1	3.65916	-1.61259	8.51e-12	3.84e-11
AC098798.1	4.59801	-2.903	8.87e-12	4e-11
AC025252.2	5.40074	-2.91978	9.07e-12	4.09e-11
PRSS56	5.66393	-1.5912	9.09e-12	4.1e-11
CRHR1	3.71605	-1.57112	9.8e-12	4.4e-11
AC005336.1	3.57717	0.333158	9.96e-12	4.47e-11
AC103705.1	4.41444	-3.23368	1e-11	4.49e-11
HOXB-AS4	4.17698	-2.31783	1.05e-11	4.68e-11
LINC02253	5.04189	-0.768771	1.06e-11	4.75e-11
ASCL1	5.10577	5.02358	1.08e-11	4.84e-11
AL356274.1	4.3839	-3.41665	1.1e-11	4.91e-11
BPIFB2	4.77885	4.6107	1.11e-11	4.94e-11
LINC00898	4.61461	-2.78452	1.11e-11	4.97e-11
RHCG	3.67627	1.59475	1.14e-11	5.07e-11
LINC00659	3.74435	-2.51644	1.14e-11	5.08e-11
SCARNA7	4.54747	1.90783	1.14e-11	5.1e-11
KCNV1	3.70217	-0.767176	1.16e-11	5.15e-11
LHX8	5.39845	-1.52138	1.19e-11	5.29e-11
DSCR8	6.53855	-0.66523	1.2e-11	5.33e-11
AC098826.2	4.73302	-3.11444	1.2e-11	5.35e-11
LINC02048	4.02221	-2.75973	1.2e-11	5.36e-11
GIP	4.27092	-2.73581	1.27e-11	5.65e-11
EIF4E1B	6.02972	-0.835371	1.31e-11	5.79e-11
DSG3	4.71358	1.85342	1.33e-11	5.89e-11
PLUT	4.92076	-2.93169	1.34e-11	5.93e-11
PHOX2B	6.41867	-1.36679	1.37e-11	6.08e-11
AC109454.3	3.75159	-2.42766	1.4e-11	6.18e-11
AC239584.1	3.88512	-2.40988	1.4e-11	6.19e-11
AC079384.1	3.74753	-0.415655	1.4e-11	6.2e-11
RNY1	7.57498	1.67311	1.4e-11	6.21e-11
OTOG	3.71438	-2.78978	1.41e-11	6.22e-11
LHFPL4	3.53646	1.41303	1.42e-11	6.29e-11
KLK8	4.96138	1.59448	1.42e-11	6.29e-11
LINC02492	5.33046	-2.69308	1.46e-11	6.46e-11
RANBP20P	4.0593	-0.829447	1.47e-11	6.48e-11
AC099520.1	4.35027	-3.47509	1.5e-11	6.59e-11
HOXD13	6.64403	-0.30523	1.55e-11	6.8e-11
PIWIL3	6.06822	-0.315063	1.57e-11	6.92e-11
SPDYC	4.28698	-0.516156	1.61e-11	7.09e-11
LINC02525	5.65473	-2.22576	1.66e-11	7.29e-11
AC008163.1	5.12862	0.199195	1.69e-11	7.41e-11
ADAM2	5.00532	-2.02687	1.69e-11	7.42e-11
VAX1	5.76462	-2.09615	1.79e-11	7.84e-11
MAGEA1	7.26648	1.63789	1.87e-11	8.17e-11
OR4C6	4.27653	-2.71587	1.88e-11	8.23e-11
AC010729.2	4.16798	-3.43092	1.93e-11	8.42e-11
AC073316.1	4.32882	-3.12346	1.97e-11	8.58e-11
NR0B1	6.37007	2.36033	1.99e-11	8.66e-11
MLXP1	4.03786	-0.709969	1.99e-11	8.68e-11
AL513548.1	5.17259	-1.03765	2e-11	8.71e-11
AC117386.1	4.76678	-3.06668	2.11e-11	9.15e-11
SNORA80A	5.90904	-2.38135	2.16e-11	9.36e-11
HOXD12	4.04498	-3.64279	2.3e-11	9.96e-11
AC073578.1	4.21338	-3.04067	2.34e-11	1.01e-10
OFCC1	4.47877	-2.18567	2.35e-11	1.02e-10
AL611929.1	4.58307	-2.65962	2.51e-11	1.08e-10
AC125603.1	4.54886	-0.494978	2.67e-11	1.15e-10
SIM1	4.26301	-1.4172	2.68e-11	1.15e-10
AC016831.4	3.71271	0.00317522	2.69e-11	1.16e-10
AL589182.1	4.9674	-3.22094	2.7e-11	1.16e-10
MAEL	3.72774	1.59135	2.79e-11	1.2e-10
DPYSL5	5.71611	0.425374	2.82e-11	1.21e-10
TMEM229A	4.54348	0.793685	2.87e-11	1.23e-10
LINC02377	5.67979	-2.71027	2.96e-11	1.27e-10
SLCO6A1	4.46196	-2.19046	3.15e-11	1.35e-10
PDCL2	4.94342	-2.31154	3.18e-11	1.36e-10
DLK1	7.11319	3.78003	3.35e-11	1.43e-10
LINC02223	3.62419	-2.99612	3.36e-11	1.43e-10
TBC1D3P1-DHX40P1	4.74923	-3.33786	3.84e-11	1.63e-10
GABRA5	4.59973	-2.33223	4e-11	1.69e-10
S100A7	5.4429	1.73498	4.11e-11	1.74e-10
TMEM179	4.00171	-0.195495	4.13e-11	1.75e-10
PSG9	5.67455	-2.48674	4.2e-11	1.78e-10
PSG3	7.4517	0.0537993	4.23e-11	1.79e-10
PRB4	8.08702	-0.186264	4.41e-11	1.86e-10
FGA	3.95796	8.54654	4.52e-11	1.9e-10
PSLNR	4.65724	-3.04548	4.53e-11	1.9e-10
KRT6B	4.08589	2.30782	4.61e-11	1.94e-10
UGT1A8	6.89606	-1.11229	4.92e-11	2.06e-10
IGFBP1	4.32374	2.08521	5.01e-11	2.1e-10
TBL1XR1-AS1	3.56989	-2.29754	5.09e-11	2.13e-10
RBM46	4.46092	-0.917451	5.16e-11	2.15e-10
RNVU1-31	5.55247	-1.0407	5.21e-11	2.18e-10
POU5F2	3.74462	-0.585583	5.78e-11	2.4e-10
BX276092.7	5.21786	-2.93602	5.86e-11	2.44e-10
AC069120.1	3.67049	-2.44944	6.05e-11	2.51e-10
SNORA54	6.2435	0.358425	6.06e-11	2.52e-10
HEPACAM2	3.73305	1.96641	6.11e-11	2.54e-10
CFHR4	3.88548	-3.32266	6.16e-11	2.56e-10
PCDH8	5.42415	0.34128	6.18e-11	2.56e-10
BHMT	3.64719	0.906893	6.26e-11	2.59e-10
CASC19	4.38638	-1.87463	6.34e-11	2.62e-10
OTX2	6.40626	-1.39155	6.43e-11	2.66e-10
MSTN	3.77457	1.3687	6.48e-11	2.68e-10
RN7SL394P	4.00956	-3.64601	6.52e-11	2.69e-10
CDH18	4.91325	-0.139456	6.79e-11	2.8e-10
DKK4	5.92376	0.768076	7.09e-11	2.92e-10
AC090502.2	3.78782	-3.64793	7.18e-11	2.95e-10
PAGE2	7.72834	1.49969	7.19e-11	2.96e-10
BPIFA4P	4.73636	-2.30179	7.21e-11	2.96e-10
ZPBP2	4.14344	-2.03063	7.57e-11	3.11e-10
PRSS29P	5.0762	-0.451964	8.3e-11	3.39e-10
CHAT	5.50736	-1.08643	8.32e-11	3.4e-10
AP000542.2	5.41527	-2.69053	8.33e-11	3.4e-10
PYDC1	4.20434	-2.41541	8.35e-11	3.41e-10
AL359955.1	5.85312	-1.30725	8.35e-11	3.41e-10
PRKCA-AS1	4.75593	-1.51412	9e-11	3.66e-10
MAGEA4	8.78125	3.60099	9.07e-11	3.69e-10
SLC30A10	5.11943	-1.02085	9.75e-11	3.95e-10
NDUFA5P6	4.91939	-2.73484	1.05e-10	4.23e-10
LINC01967	4.26955	-3.10732	1.06e-10	4.29e-10
GC	8.15555	1.13464	1.07e-10	4.34e-10
AL355075.4	6.57142	1.745	1.2e-10	4.8e-10
DCAF4L2	7.75654	-0.518017	1.23e-10	4.93e-10
KRT14	4.06853	3.54157	1.23e-10	4.96e-10
RNU5A-1	7.65867	1.51432	1.28e-10	5.14e-10
AC107308.1	4.08735	-3.50134	1.29e-10	5.18e-10
UGT2B10	3.9953	-3.67992	1.32e-10	5.28e-10
COMETT	3.59218	-2.62544	1.38e-10	5.5e-10
SOX14	6.24759	0.698236	1.42e-10	5.66e-10
AC084026.3	3.80286	-3.41151	1.44e-10	5.74e-10
AF274573.1	6.60921	-1.62681	1.44e-10	5.75e-10
AL445072.1	3.72414	-3.89658	1.48e-10	5.89e-10
SST	7.42746	3.53232	1.48e-10	5.89e-10
AL390334.1	4.3303	-2.82037	1.48e-10	5.89e-10
STRA8	4.89955	-1.04617	1.48e-10	5.91e-10
VCX	4.30259	-1.54349	1.53e-10	6.07e-10
APOA2	4.57303	-0.212548	1.57e-10	6.23e-10
AC034223.2	4.37113	-3.31926	1.58e-10	6.27e-10
C5orf66-AS1	3.9365	-2.59087	1.59e-10	6.31e-10
LINC00648	4.02913	0.428158	1.59e-10	6.32e-10
H4C13	6.87475	-1.5235	1.6e-10	6.36e-10
AL135929.2	5.20554	-3.02752	1.65e-10	6.54e-10
FOXG1	5.14835	-0.942031	1.68e-10	6.64e-10
AZGP1P1	4.20388	-1.76243	1.68e-10	6.65e-10
DDX53	5.15357	-1.77685	1.77e-10	6.99e-10
AC002378.1	4.00136	-2.67162	1.81e-10	7.14e-10
SLC2A2	6.27615	-0.854419	1.84e-10	7.26e-10
PRDM9	5.46539	-2.50992	1.86e-10	7.32e-10
AC093791.1	5.63229	-2.54474	1.88e-10	7.4e-10
PSG4	7.62967	1.27649	1.99e-10	7.78e-10
LINC01206	3.59492	-2.07988	2.02e-10	7.93e-10
AC007494.3	3.64528	-2.50474	2.02e-10	7.93e-10
TAS2R38	4.24852	-3.29109	2.09e-10	8.16e-10
LINC02484	5.85576	-2.56585	2.09e-10	8.17e-10
G2E3-AS1	5.19617	-2.32044	2.14e-10	8.37e-10
B3GALT1-AS1	4.33965	-2.90145	2.16e-10	8.44e-10
VCX3A	5.75078	-1.51042	2.23e-10	8.68e-10
MUC17	7.70413	1.33034	2.26e-10	8.8e-10
RN7SL767P	3.51323	-1.28794	2.32e-10	9.02e-10
ATP4A	3.9455	-2.05519	2.4e-10	9.32e-10
AP005262.1	4.40291	-1.62954	2.46e-10	9.57e-10
NEUROD1	6.76892	1.90263	2.52e-10	9.78e-10
AC091179.1	5.00139	-2.61983	2.58e-10	9.99e-10
LINC00355	4.43114	-0.955388	2.6e-10	1.01e-09
PAGE5	5.12701	-0.194919	2.6e-10	1.01e-09
LINC01036	5.53299	-2.60384	2.64e-10	1.02e-09
NTS	5.07947	6.24647	2.73e-10	1.05e-09
OTOS	5.27959	-2.43539	2.76e-10	1.06e-09
AL445647.1	5.11307	-2.82872	2.79e-10	1.08e-09
CSAG3	5.12943	-0.881069	2.8e-10	1.08e-09
MAGEB1	6.51438	-1.84293	2.84e-10	1.09e-09
RNU6-140P	4.73335	-2.17046	2.95e-10	1.14e-09
FGF21	4.58231	-3.21668	2.97e-10	1.14e-09
CPS1-IT1	4.78085	-3.33606	3e-10	1.15e-09
LINC02263	4.0456	-3.53979	3e-10	1.15e-09
PSG6	5.83123	-2.441	3.02e-10	1.16e-09
LINC02335	5.19082	-2.90524	3.05e-10	1.17e-09
LINC01776	3.81426	-3.25614	3.07e-10	1.18e-09
CSAG2	5.43309	-1.51083	3.08e-10	1.18e-09
SNORA74A	6.96497	-0.0636746	3.14e-10	1.2e-09
HMX2	4.54448	-2.62623	3.2e-10	1.23e-09
UGT1A3	4.5443	-3.2261	3.24e-10	1.24e-09
STXBP5L	3.72058	-0.25012	3.26e-10	1.25e-09
SNORA74D	5.54471	-2.18433	3.27e-10	1.25e-09
SLC6A15	4.0069	0.620839	3.29e-10	1.26e-09
C3P1	5.33133	-2.26171	3.32e-10	1.27e-09
AC011270.2	3.56703	-3.73352	3.38e-10	1.29e-09
CYP2B6	3.98446	0.576333	3.4e-10	1.3e-09
SSTR5	3.87976	-2.46914	3.44e-10	1.31e-09
KNOP1P5	4.55822	-2.54946	3.5e-10	1.34e-09
FER1L6-AS2	4.46615	-3.19395	3.59e-10	1.37e-09
MAGEA4-AS1	6.41766	-1.93415	3.6e-10	1.37e-09
MIR3609	6.19647	0.272084	3.87e-10	1.47e-09
AC099487.1	3.77433	-3.45336	3.89e-10	1.48e-09
GCG	8.15543	1.22291	3.9e-10	1.48e-09
UGT1A7	4.53542	-1.9156	3.91e-10	1.48e-09
LINC00601	3.60955	-3.05033	3.96e-10	1.5e-09
NAA11	5.47185	-1.05473	3.99e-10	1.51e-09
ZIC1	4.90242	0.65305	4.05e-10	1.53e-09
SNORA49	6.65715	-0.0532633	4.17e-10	1.57e-09
AC110015.1	3.91516	-3.70525	4.28e-10	1.61e-09
UGT1A1	4.59325	-1.54018	4.38e-10	1.65e-09
LRRC38	4.98242	0.967796	4.5e-10	1.69e-09
AC021876.1	3.94364	-3.68887	4.59e-10	1.73e-09
AC026336.3	6.25777	-0.377921	4.63e-10	1.74e-09
NKX2-4	5.32266	-1.82981	4.7e-10	1.77e-09
AC098592.1	6.06558	-2.28439	4.9e-10	1.84e-09
LINC00221	5.13664	-0.67213	4.9e-10	1.84e-09
RN7SKP9	6.0658	-0.817904	4.93e-10	1.85e-09
AC106771.1	5.38948	-2.21747	5.13e-10	1.92e-09
LINC02152	4.49856	-3.06983	5.13e-10	1.92e-09
ATP11AUN	3.87745	-0.676803	5.35e-10	2e-09
AL160271.2	7.0485	-0.661741	5.38e-10	2.01e-09
AC114786.2	6.43262	-1.87714	5.43e-10	2.03e-09
LINC01202	4.85746	-3.27095	5.49e-10	2.05e-09
ZFHX4-AS1	3.95694	-2.49006	5.49e-10	2.05e-09
GABRG3	3.61169	-0.227869	5.52e-10	2.06e-09
TMED11P	3.53535	-1.69313	5.59e-10	2.08e-09
ZIC4	5.00231	-0.929409	5.6e-10	2.09e-09
AC025244.1	4.02509	-3.08464	5.67e-10	2.11e-09
SPANXC	5.66109	-2.74126	5.71e-10	2.12e-09
SPRR3	4.6243	1.58279	5.72e-10	2.13e-09
H2BC1	4.56828	-3.36182	5.72e-10	2.13e-09
AC055717.2	5.56781	-2.61581	5.92e-10	2.2e-09
AL356133.1	4.53745	-3.30007	5.98e-10	2.22e-09
SLAMF6P1	3.79809	-2.9143	6.08e-10	2.26e-09
PSG5	7.39052	0.554191	6.13e-10	2.27e-09
AL589740.1	4.11509	-3.476	6.54e-10	2.42e-09
DSCR4	5.84414	-2.59249	6.66e-10	2.46e-09
SLC6A10P	5.07625	-2.22135	6.89e-10	2.54e-09
DSPP	3.85407	-3.14819	7.13e-10	2.63e-09
FER1L6	3.84101	2.82032	7.15e-10	2.63e-09
AC106794.1	4.50788	-3.48224	7.18e-10	2.64e-09
LINC01419	7.22274	1.08336	7.46e-10	2.74e-09
ADAM6	5.34122	-2.98534	7.91e-10	2.9e-09
AC084357.3	4.74023	-3.04269	8.29e-10	3.04e-09
LINC00645	4.70954	-3.03231	8.33e-10	3.05e-09
LINC02404	5.62384	-1.64044	8.36e-10	3.06e-09
PHF2P2	4.97352	-1.84461	8.62e-10	3.15e-09
BAGE2	5.76498	-1.41772	8.68e-10	3.17e-09
LINC00668	3.98471	-0.238755	8.88e-10	3.24e-09
GAGE2A	6.94933	-1.65687	8.94e-10	3.26e-09
RNU5E-1	5.55884	-0.268481	9.37e-10	3.4e-09
RNU5B-1	9.04022	1.6537	9.82e-10	3.56e-09
ZIC3	5.65815	-1.67906	9.82e-10	3.56e-09
ATOH1	5.59047	-2.44793	9.87e-10	3.58e-09
ISX	5.24162	-0.31129	9.88e-10	3.58e-09
GH2	4.62115	-3.29632	1e-09	3.64e-09
TMEM132D-AS1	5.66624	-2.11697	1.03e-09	3.73e-09
OR1F1	3.76079	-3.65348	1.04e-09	3.76e-09
TEX101	3.67567	-0.489343	1.09e-09	3.94e-09
CACNA2D1-AS1	4.65219	-2.73519	1.09e-09	3.94e-09
SPANXB1	6.54311	-0.22669	1.15e-09	4.15e-09
GABRR1	3.51001	-0.863185	1.15e-09	4.15e-09
IQCM	3.5147	-3.55931	1.19e-09	4.27e-09
NKX2-5	4.27771	-1.97094	1.2e-09	4.3e-09
LINC01667	5.99955	-0.254546	1.24e-09	4.43e-09
AC016550.2	4.2951	-3.48627	1.25e-09	4.49e-09
RFX6	4.65096	-0.548114	1.29e-09	4.6e-09
CSAG4	5.06244	-2.98363	1.32e-09	4.7e-09
AL442224.1	3.55279	-1.19799	1.33e-09	4.74e-09
AL691420.1	5.02338	-3.05161	1.34e-09	4.78e-09
ZNF716	4.99465	-1.88086	1.35e-09	4.83e-09
RN7SL434P	4.96832	-2.06214	1.4e-09	4.97e-09
AC087855.2	3.58654	-3.95414	1.41e-09	5e-09
AC096759.2	4.55587	-2.92405	1.44e-09	5.1e-09
SNORA22C	4.21453	-1.94577	1.47e-09	5.22e-09
AC006065.4	3.71191	-3.19901	1.5e-09	5.33e-09
AC083801.2	3.61598	-3.52764	1.65e-09	5.82e-09
AC090809.1	5.4392	-2.73303	1.72e-09	6.04e-09
LINC02476	5.64253	-1.98047	1.74e-09	6.13e-09
AC123905.1	3.55741	-3.63948	1.78e-09	6.25e-09
AC024230.1	4.11523	-3.09086	1.8e-09	6.32e-09
SNORA63D	4.81934	-3.21774	1.82e-09	6.37e-09
RN7SL151P	5.33793	-2.03049	1.82e-09	6.38e-09
TUBA3E	3.84158	-1.69098	1.87e-09	6.55e-09
AC122694.1	3.55754	-3.04405	1.88e-09	6.6e-09
LINC00393	4.86085	-2.5053	1.99e-09	6.96e-09
AC131211.1	5.04796	-3.18049	2.01e-09	7.03e-09
FSTL5	4.55583	0.287567	2.17e-09	7.55e-09
PAGE2B	5.10699	-0.562819	2.19e-09	7.62e-09
TUSC8	3.84401	-0.622273	2.54e-09	8.74e-09
AC006357.1	3.88196	-3.49696	2.6e-09	8.96e-09
RN7SKP255	7.68609	-0.159286	2.62e-09	9e-09
SLITRK1	4.74401	-1.75547	2.68e-09	9.2e-09
SPANXD	5.45787	-2.89642	2.69e-09	9.26e-09
AC122710.1	5.20817	-2.38174	2.73e-09	9.37e-09
AF121898.1	4.45559	-2.995	2.76e-09	9.48e-09
RBFOX1	4.20714	-0.271439	2.85e-09	9.77e-09
DSG1-AS1	4.62464	-2.79148	2.89e-09	9.88e-09
SNORA84	5.64815	-1.77124	2.91e-09	9.95e-09
SAGE1	4.44352	-1.04907	2.91e-09	9.96e-09
AC136759.1	3.58544	-3.21357	3.02e-09	1.03e-08
RPS17P11	3.56927	-3.70134	3.06e-09	1.04e-08
RNVU1-7	3.8878	-1.59276	3.06e-09	1.04e-08
IAPP	3.66426	-3.63188	3.1e-09	1.06e-08
LINC01924	4.67233	-2.88985	3.16e-09	1.08e-08
AL079305.1	3.68237	-3.91629	3.27e-09	1.11e-08
LINC01257	4.6765	-1.39978	3.37e-09	1.15e-08
SKOR2	4.78047	-2.97024	3.41e-09	1.16e-08
LINC02267	5.44257	-2.38544	3.49e-09	1.18e-08
PSG11	6.88749	-1.71711	3.59e-09	1.21e-08
PINCR	4.35379	-3.29665	3.65e-09	1.23e-08
FMR1NB	4.61095	-1.87754	3.71e-09	1.25e-08
SSX1	6.51133	-0.339826	3.73e-09	1.26e-08
CGB3	4.15704	-2.78709	3.75e-09	1.27e-08
VGLL2	6.77477	0.592608	3.76e-09	1.27e-08
H1-1	5.90193	-1.83261	3.77e-09	1.27e-08
AL133467.2	4.08859	-2.34907	3.85e-09	1.3e-08
TGIF2LX	4.66603	-3.37804	3.88e-09	1.31e-08
SPINT4	3.59759	-2.91081	3.91e-09	1.32e-08
LCN15	4.63734	0.0923795	3.99e-09	1.34e-08
SPRR1A	3.81014	0.306497	4.02e-09	1.35e-08
BX005019.1	3.75174	-3.65959	4.16e-09	1.4e-08
AC024595.1	4.31327	-3.60222	4.18e-09	1.4e-08
SEPTIN14	4.78592	-1.49708	4.24e-09	1.42e-08
AL157778.1	5.19632	-2.70811	4.35e-09	1.46e-08
LINC02448	4.51308	-3.49967	4.42e-09	1.48e-08
SNORA14A	3.61179	-2.26303	4.53e-09	1.52e-08
LINC01249	4.82219	-2.67039	4.62e-09	1.54e-08
AC018470.1	3.8845	-3.74027	4.63e-09	1.55e-08
DEFA5	9.56779	1.29916	4.63e-09	1.55e-08
APCS	5.2647	-3.03464	4.67e-09	1.56e-08
LINC01446	4.43335	-0.640242	4.81e-09	1.61e-08
AP000542.1	4.36077	-3.46646	4.83e-09	1.61e-08
RTL1	4.64198	-1.68895	4.93e-09	1.65e-08
KCNJ18	5.49146	-1.29567	4.98e-09	1.66e-08
NFYAP1	3.54558	-3.56842	5.12e-09	1.7e-08
LINC01345	5.31914	-2.5392	5.14e-09	1.71e-08
AC005090.1	4.96025	-2.75686	5.19e-09	1.73e-08
AL451137.2	3.50797	-3.80232	5.22e-09	1.73e-08
AC092427.1	3.66742	-2.96841	5.37e-09	1.78e-08
IGFL1	3.59485	-0.182362	5.5e-09	1.82e-08
SNORA7B	3.56951	-0.777979	5.86e-09	1.94e-08
TEX37	3.86319	-3.60524	6.09e-09	2.01e-08
LINC01456	4.60384	-2.98243	6.42e-09	2.12e-08
PPP4R3C	5.48878	-2.64994	6.83e-09	2.24e-08
TRIM48	8.00533	0.425776	6.91e-09	2.27e-08
UGT3A1	5.86976	1.46708	7.15e-09	2.35e-08
AC087857.1	4.03188	-3.37704	7.47e-09	2.44e-08
AC022335.1	4.21086	-3.66751	7.61e-09	2.49e-08
HOMER2P1	3.93608	-2.63663	7.71e-09	2.52e-08
RPL35AP2	3.5826	-2.17339	7.82e-09	2.55e-08
FAM230C	5.29532	-2.06143	8.09e-09	2.64e-08
TPTE	4.96292	-3.04978	8.18e-09	2.66e-08
H4C6	6.40422	-1.31216	8.3e-09	2.7e-08
KRT31	4.854	-1.80341	8.32e-09	2.71e-08
NLRP5	5.49273	-1.43563	8.33e-09	2.71e-08
DCAF8L2	4.84007	-2.7859	8.54e-09	2.77e-08
AL133467.4	4.19753	-2.81121	8.89e-09	2.88e-08
AC005307.1	3.99761	-2.5969	9.45e-09	3.06e-08
RMRP	6.19397	-0.909331	9.55e-09	3.09e-08
RNY3	7.01378	-1.62428	9.8e-09	3.16e-08
NKX2-2	5.15786	-1.77589	1.03e-08	3.32e-08
HSD3B2	4.51487	-1.31469	1.04e-08	3.34e-08
FAM9C	4.03495	-0.883429	1.05e-08	3.37e-08
F13B	3.6725	-3.91941	1.05e-08	3.38e-08
BNIP3P2	4.7591	-3.25903	1.05e-08	3.38e-08
TMEM238L	3.66531	-0.253442	1.1e-08	3.52e-08
PRB1	6.00514	-1.93047	1.12e-08	3.6e-08
CNMD	4.83483	3.965	1.15e-08	3.67e-08
AL513304.1	6.57787	-1.98269	1.15e-08	3.69e-08
AF127577.6	3.81305	-0.965775	1.17e-08	3.74e-08
AC112178.1	4.06883	-3.59483	1.23e-08	3.94e-08
TUBA3C	6.67977	0.274278	1.23e-08	3.94e-08
BNIP3P6	4.88752	-3.31301	1.25e-08	3.99e-08
LINC00392	5.64501	-2.75288	1.27e-08	4.03e-08
AC073578.2	3.82452	-3.31425	1.32e-08	4.2e-08
LINC02506	4.5531	-1.46536	1.38e-08	4.39e-08
ARHGAP36	5.07495	-1.40521	1.44e-08	4.54e-08
AIG1P1	3.67477	-3.93395	1.45e-08	4.58e-08
SLC17A4	4.02989	-2.67929	1.45e-08	4.6e-08
AC243972.2	4.50447	-2.44337	1.5e-08	4.74e-08
AC025419.1	3.55975	-0.0451132	1.51e-08	4.75e-08
RNA5-8SP2	7.57087	-0.970634	1.51e-08	4.75e-08
AC100800.1	4.37013	-2.03302	1.52e-08	4.79e-08
UHRF2P1	3.60907	-1.97181	1.52e-08	4.79e-08
LINC02820	4.19346	-2.1077	1.53e-08	4.81e-08
ANKRD20A19P	3.85685	-0.994513	1.55e-08	4.88e-08
DEFB126	3.87538	-3.28465	1.58e-08	4.96e-08
AC069061.2	5.35728	-2.67205	1.61e-08	5.07e-08
GPR50	4.32529	-2.30131	1.62e-08	5.08e-08
IRX4	4.39168	-1.02243	1.62e-08	5.1e-08
AC007431.2	3.90094	-3.70859	1.67e-08	5.23e-08
AF279873.3	4.83523	-2.50695	1.68e-08	5.26e-08
SULT1C3	4.30368	-3.30447	1.69e-08	5.29e-08
G6PC	6.01777	0.479053	1.72e-08	5.4e-08
CTCFL	4.00326	-0.204322	1.74e-08	5.43e-08
CYP11B1	6.63501	-0.646021	1.74e-08	5.44e-08
AC116666.1	3.66021	-3.72728	1.76e-08	5.52e-08
SCARNA1	4.67361	-1.84068	1.78e-08	5.57e-08
FRG2	3.95485	-3.78588	1.82e-08	5.69e-08
CPLX2	4.2828	4.78574	1.84e-08	5.75e-08
PASD1	6.57702	0.0365456	1.85e-08	5.77e-08
GACAT3	4.84717	-2.66975	1.86e-08	5.79e-08
PHKBP2	3.79586	-2.36239	1.86e-08	5.81e-08
LINC02037	3.90275	-1.91039	1.87e-08	5.82e-08
AC124290.2	3.97581	-3.76711	1.87e-08	5.82e-08
AC016687.3	5.06872	-2.69574	1.92e-08	5.96e-08
DPPA2	6.28627	-2.03569	1.96e-08	6.09e-08
AC090023.2	4.19013	-3.53962	2.01e-08	6.23e-08
AC009264.1	3.51468	-2.19203	2.06e-08	6.39e-08
PHGR1	3.50364	-0.893873	2.2e-08	6.81e-08
GUCY2EP	3.50515	-1.4048	2.22e-08	6.87e-08
CHODL-AS1	3.69319	-3.50616	2.25e-08	6.96e-08
RN7SKP227	5.96073	-2.51765	2.32e-08	7.14e-08
AC120498.7	5.53704	-2.60457	2.35e-08	7.25e-08
AP003467.2	3.79371	-3.25931	2.39e-08	7.36e-08
SNORA20	3.87069	-1.56647	2.44e-08	7.5e-08
AC069228.1	4.14281	-2.67305	2.44e-08	7.51e-08
ZNF560	3.87461	-0.120764	2.45e-08	7.52e-08
CRP	3.70034	-1.15795	2.53e-08	7.75e-08
XAGE5	4.46679	-3.50396	2.58e-08	7.91e-08
LINC02582	5.62768	-1.46058	2.61e-08	7.98e-08
MUC5AC	3.8434	8.61215	2.62e-08	8.02e-08
MAGEB16	6.04352	-1.91414	2.76e-08	8.43e-08
LINC01956	3.84653	-3.12225	2.82e-08	8.61e-08
AL354685.1	6.45513	-2.05333	2.85e-08	8.69e-08
RN7SL507P	4.7781	-1.95097	2.86e-08	8.72e-08
H3Y1	4.53911	-3.48777	2.9e-08	8.84e-08
PHOX2A	3.81511	-2.93447	2.99e-08	9.08e-08
LINC00602	3.7486	-3.00692	3e-08	9.11e-08
TMEM14EP	3.63551	-1.70637	3.02e-08	9.17e-08
RPSAP71	4.08521	-3.3395	3.03e-08	9.19e-08
CNTNAP5	3.81001	-2.84546	3.19e-08	9.68e-08
FTHL17	6.54556	-1.22738	3.25e-08	9.85e-08
ANKRD30BP2	3.58423	-3.94912	3.31e-08	1e-07
LINC01414	4.08088	-3.30899	3.34e-08	1.01e-07
RNVU1-2	5.60404	-1.83084	3.39e-08	1.03e-07
FOXR2	5.0059	-3.20926	3.57e-08	1.08e-07
PES1P1	4.32108	-3.51002	3.58e-08	1.08e-07
GAGE1	6.10056	-1.97784	3.65e-08	1.1e-07
LINC01681	3.64329	-3.56602	3.75e-08	1.13e-07
LINC00871	3.75443	-2.51316	3.86e-08	1.16e-07
RN7SKP71	5.14553	-2.51085	3.88e-08	1.17e-07
AC106794.2	3.63748	-3.92137	3.95e-08	1.19e-07
NEUROD4	6.26197	-1.95885	4.01e-08	1.2e-07
AC142384.1	3.79206	-3.74591	4.05e-08	1.21e-07
BARHL2	4.2391	-3.21075	4.09e-08	1.22e-07
AL391097.1	3.97493	-3.52241	4.11e-08	1.23e-07
PSG8	5.59621	-2.27652	4.12e-08	1.23e-07
LIPF	4.78412	-1.43677	4.2e-08	1.26e-07
KLF2P4	4.0508	-3.05121	4.23e-08	1.27e-07
SNORA38	3.83543	-2.3073	4.31e-08	1.29e-07
AC006206.1	3.60391	-3.73699	4.4e-08	1.31e-07
LINC02438	3.74155	-3.11586	4.41e-08	1.32e-07
AC025881.1	3.91722	-3.79424	4.51e-08	1.34e-07
AC104793.1	4.6197	-3.411	4.55e-08	1.36e-07
AC021534.1	4.20453	-3.68614	4.64e-08	1.38e-07
RN7SL149P	4.64814	-3.44308	4.72e-08	1.4e-07
HTR3B	4.37365	-1.5883	4.72e-08	1.4e-07
FGF3	4.53143	-2.61054	4.76e-08	1.41e-07
LILRP1	3.77719	0.616195	4.81e-08	1.43e-07
ACTL6B	3.55079	-1.62392	4.86e-08	1.44e-07
FAM83C	3.82851	-2.22642	4.92e-08	1.46e-07
FAM9A	4.40727	-3.58147	4.94e-08	1.47e-07
AL160408.4	3.73434	-3.71422	4.99e-08	1.48e-07
ZNF736P9Y	4.42815	-3.15908	5.04e-08	1.49e-07
RNVU1-2A	5.91758	-2.3528	5.17e-08	1.53e-07
AC009884.1	3.90827	-3.1895	5.19e-08	1.54e-07
HSPA8P13	3.67046	-3.92248	5.57e-08	1.64e-07
OR56A3	4.81032	-3.01445	5.71e-08	1.68e-07
MAGEA9	4.52172	-3.48574	5.72e-08	1.68e-07
AL359095.1	4.66958	-2.34361	5.74e-08	1.69e-07
LINC01210	4.86905	-2.77481	5.74e-08	1.69e-07
DCAF8L1	3.97834	-3.58139	5.75e-08	1.69e-07
GTF2IP6	5.14373	-2.91202	5.83e-08	1.71e-07
PAGE1	5.17932	-0.480365	5.93e-08	1.74e-07
RN7SKP79	4.40801	-3.56988	5.99e-08	1.76e-07
SPATA16	3.66013	-3.78429	6.08e-08	1.78e-07
E2F3-IT1	3.78805	-3.33761	6.26e-08	1.83e-07
AC104794.4	3.92213	-3.50154	6.45e-08	1.88e-07
MCCD1	3.88409	-2.43019	6.49e-08	1.89e-07
SPAG11B	6.81049	-1.19082	6.61e-08	1.93e-07
NAALADL2-AS3	4.1697	-3.36516	6.63e-08	1.93e-07
ALPI	4.38308	-3.05483	7.03e-08	2.04e-07
AC114786.1	4.83659	-2.69102	7.08e-08	2.06e-07
LINC02697	4.28808	-2.69762	7.16e-08	2.08e-07
SNORA46	3.50292	-2.84891	7.28e-08	2.11e-07
AC073530.1	3.67557	-3.85222	7.47e-08	2.16e-07
CLEC2A	4.90713	-1.60433	7.84e-08	2.26e-07
GAST	3.62246	-3.62073	8.03e-08	2.31e-07
KC877982.1	4.34906	-3.08996	8.07e-08	2.33e-07
AF178030.1	4.31752	-2.70243	8.22e-08	2.37e-07
SPAG11A	6.64519	-1.59545	8.22e-08	2.37e-07
TEX13B	3.90133	-3.49869	8.5e-08	2.44e-07
AC004704.1	4.39007	-1.90372	8.52e-08	2.45e-07
LINC01608	5.2315	-2.55722	9.16e-08	2.62e-07
LYZL2	3.5224	-3.91442	9.3e-08	2.66e-07
AC037487.2	3.57593	-2.31806	9.4e-08	2.69e-07
SCARNA3	4.38261	-3.07585	9.42e-08	2.7e-07
AL139393.2	4.26091	-3.45619	9.44e-08	2.7e-07
MAGEB2	5.01307	0.839402	9.58e-08	2.74e-07
GLYATL3	4.52839	-2.83696	9.91e-08	2.83e-07
SLC25A48-AS1	3.65897	-3.83202	9.99e-08	2.85e-07
CGB8	3.59829	-3.2108	1e-07	2.86e-07
KRT33A	5.22924	-2.553	1.01e-07	2.88e-07
AC090502.3	3.74004	-3.57247	1.03e-07	2.93e-07
AL391863.2	4.78936	-2.58023	1.03e-07	2.94e-07
RN7SKP203	6.35693	-1.269	1.05e-07	2.97e-07
AC018692.2	3.92923	-3.84108	1.05e-07	2.99e-07
LINC02789	3.79656	-3.88829	1.14e-07	3.23e-07
LINC02196	3.67449	-3.67299	1.18e-07	3.33e-07
VN1R54P	3.59553	-3.94798	1.19e-07	3.38e-07
CR392039.3	3.79505	-3.4733	1.2e-07	3.4e-07
AC106875.1	4.24376	-1.5312	1.22e-07	3.43e-07
LINC02411	4.45786	-3.54648	1.22e-07	3.45e-07
CTAG2	5.67267	0.896779	1.24e-07	3.49e-07
AC068985.1	3.56044	-3.71472	1.26e-07	3.56e-07
AF130417.1	3.65925	-3.73513	1.28e-07	3.6e-07
SOX3	3.71768	-2.60386	1.28e-07	3.62e-07
RN7SL664P	3.70976	-3.00918	1.33e-07	3.73e-07
AC133106.1	3.71811	-3.63632	1.34e-07	3.76e-07
BPIFB6	3.95473	-3.27541	1.34e-07	3.77e-07
AC006484.1	4.74868	-3.36845	1.34e-07	3.77e-07
AC022031.2	3.63172	-2.78519	1.34e-07	3.77e-07
RN7SL296P	4.24699	-2.24185	1.34e-07	3.78e-07
DDX43P3	3.70274	-2.78906	1.35e-07	3.78e-07
LINC01346	4.59912	-2.46832	1.36e-07	3.81e-07
AC073365.1	4.85557	-2.1246	1.43e-07	4.01e-07
SNORA40B	4.2574	-3.1607	1.45e-07	4.06e-07
AC092916.1	4.30714	-3.59842	1.51e-07	4.22e-07
INS	5.74652	-2.28754	1.53e-07	4.27e-07
PPP1R1AP2	4.26076	-3.63885	1.57e-07	4.37e-07
PLCB1-IT1	4.56958	-3.4863	1.57e-07	4.38e-07
SERPINA7	4.11239	-3.39175	1.6e-07	4.46e-07
RNU6-77P	3.92686	-3.79044	1.61e-07	4.49e-07
BNIP3P7	3.82561	-3.75186	1.63e-07	4.53e-07
SIRLNT	4.98835	-2.3811	1.66e-07	4.63e-07
RN7SL564P	4.42308	-2.70242	1.75e-07	4.84e-07
RAX	3.57215	-2.23326	1.76e-07	4.88e-07
LINC01896	5.05851	-2.52549	1.76e-07	4.88e-07
GPR1-AS	4.58442	-1.97887	1.76e-07	4.89e-07
LINC01221	3.86396	-3.8131	1.77e-07	4.9e-07
AL158819.1	4.06438	-2.64453	1.78e-07	4.93e-07
RNA5-8SP4	5.87794	-2.62123	1.81e-07	5.02e-07
BMP2KL	4.80885	-2.32197	1.86e-07	5.14e-07
NF1P8	3.99883	-3.65004	1.87e-07	5.16e-07
CYP4F8	3.70018	-2.77697	1.88e-07	5.2e-07
OLIG3	5.0043	-2.46425	1.96e-07	5.4e-07
AC007159.1	4.79624	-2.1008	1.98e-07	5.45e-07
LINC01831	4.96674	-3.24735	1.99e-07	5.47e-07
LINC02141	4.08629	-3.05362	2.01e-07	5.53e-07
RN7SL342P	4.91088	-3.16464	2.03e-07	5.59e-07
AL139274.1	4.69266	-2.12846	2.06e-07	5.66e-07
AL512326.3	3.54222	-2.72171	2.07e-07	5.67e-07
CARD18	3.95491	-3.46386	2.11e-07	5.78e-07
AC244107.1	4.04027	-3.418	2.11e-07	5.79e-07
AC005972.1	4.34142	-3.61468	2.16e-07	5.92e-07
UGT2A3	4.99232	-0.21926	2.33e-07	6.36e-07
POU3F3	3.98987	-1.47022	2.33e-07	6.36e-07
RN7SL116P	3.89835	-2.58664	2.34e-07	6.38e-07
AC096721.1	3.61549	-3.95132	2.38e-07	6.49e-07
AC016710.1	4.07365	-3.72666	2.45e-07	6.67e-07
FGF4	4.53104	-2.93133	2.47e-07	6.71e-07
LINC02327	4.02181	-2.66923	2.55e-07	6.91e-07
AL356057.1	4.52919	-2.51659	2.64e-07	7.16e-07
SCHLAP1	3.96527	-3.56527	2.69e-07	7.29e-07
RN7SL546P	3.50152	-0.86757	2.7e-07	7.31e-07
RN7SL217P	4.64885	-3.44445	2.81e-07	7.6e-07
RN7SL508P	3.68434	-2.96904	2.84e-07	7.66e-07
PIGFP2	4.45863	-3.55618	3.03e-07	8.15e-07
AC009135.1	3.96382	-3.79579	3.16e-07	8.49e-07
AC073651.1	3.53981	-2.18425	3.18e-07	8.53e-07
AC010486.3	3.884	-3.84249	3.19e-07	8.56e-07
RN7SL732P	3.63978	-3.04025	3.23e-07	8.68e-07
AL049775.2	3.5926	-3.60871	3.37e-07	9.04e-07
LINC01992	4.24107	-2.6332	3.52e-07	9.41e-07
HNRNPA1P29	4.2201	-3.461	3.53e-07	9.45e-07
NTSR2	3.765	-3.0935	3.54e-07	9.46e-07
LINC01297	3.72147	-3.3698	3.59e-07	9.61e-07
SNORA37	3.61399	-2.12653	3.64e-07	9.72e-07
SLC30A6P1	4.20564	-3.55262	3.65e-07	9.76e-07
AC092139.1	4.13981	-1.81974	3.67e-07	9.81e-07
AC023824.6	4.87515	-1.02711	3.68e-07	9.82e-07
AC023813.2	4.24426	-2.7955	3.7e-07	9.89e-07
CU104787.1	3.84188	-3.83432	3.78e-07	1.01e-06
ZBTB20-AS5	3.61678	-1.79238	3.86e-07	1.03e-06
AC091987.1	3.60503	-3.6805	3.88e-07	1.03e-06
RNU5A-8P	4.33398	-3.44729	3.97e-07	1.06e-06
AL135929.1	3.85078	-3.81364	4.04e-07	1.07e-06
HRH3	3.96661	-2.11252	4.19e-07	1.11e-06
APOA4	3.94747	-2.93647	4.3e-07	1.14e-06
KIF18BP1	3.67388	-3.75797	4.33e-07	1.14e-06
RNA5-8SN1	4.77537	-3.36825	4.48e-07	1.18e-06
DPYD-AS2	3.75796	-2.20128	4.51e-07	1.19e-06
RNU1-88P	5.20733	-2.13202	4.55e-07	1.2e-06
AC112495.1	5.37281	-2.45651	4.66e-07	1.23e-06
SNRPEP10	3.77141	-2.98622	4.73e-07	1.24e-06
RN7SL786P	4.02092	-3.78047	4.8e-07	1.26e-06
RN7SL769P	4.71104	-2.78488	4.85e-07	1.28e-06
LINC02672	4.03502	-3.30915	4.89e-07	1.28e-06
LINC01444	3.61162	-2.7818	4.93e-07	1.3e-06
AC021134.1	3.72986	-3.9027	4.96e-07	1.3e-06
RN7SL359P	3.68274	-3.11767	5.17e-07	1.35e-06
NLRP13	4.09735	-3.02537	5.19e-07	1.36e-06
AL589655.1	4.85565	-2.92636	5.21e-07	1.36e-06
PRLHR	4.02248	-1.84589	5.24e-07	1.37e-06
LGALS13	4.29553	-3.63486	5.27e-07	1.38e-06
AC073347.1	4.08208	-3.34611	5.39e-07	1.41e-06
EMX2	3.77038	-0.968786	5.43e-07	1.42e-06
AC015631.1	4.15053	-3.56545	5.65e-07	1.47e-06
RNA5-8SP6	4.86047	-1.82109	5.74e-07	1.49e-06
AC023824.5	5.17826	-2.90099	5.99e-07	1.56e-06
AL590632.1	3.58535	-3.03789	6.22e-07	1.61e-06
RN7SL398P	3.89428	-3.26463	6.54e-07	1.69e-06
AC019278.1	4.28501	-3.65705	7.02e-07	1.81e-06
GABRG2	4.22145	-1.13876	7.15e-07	1.84e-06
MTND2P2	4.22589	-3.21916	8.05e-07	2.06e-06
AC091151.2	3.84448	-3.56975	8.61e-07	2.19e-06
FLJ36000	3.97042	-3.35335	8.91e-07	2.26e-06
AC110813.1	3.92564	-2.02346	9.26e-07	2.34e-06
AL139120.1	4.05505	-2.86789	9.28e-07	2.35e-06
RNU6-681P	4.25467	-3.3444	9.35e-07	2.37e-06
NPY	5.03495	2.39568	9.47e-07	2.39e-06
AC139792.3	3.70212	-3.63282	9.77e-07	2.47e-06
HDGFL1	3.84061	-3.49777	9.92e-07	2.5e-06
AC091133.3	3.58704	-3.88835	1.02e-06	2.58e-06
TAC1	4.88586	1.99607	1.05e-06	2.65e-06
RN7SL300P	3.83091	-2.97746	1.11e-06	2.77e-06
AC064872.1	3.99493	-3.80091	1.15e-06	2.88e-06
PAQR9-AS1	3.62794	-2.96589	1.19e-06	2.97e-06
TIMM9P1	3.74738	-3.19222	1.2e-06	2.99e-06
RNU6-522P	3.7887	-3.89358	1.24e-06	3.08e-06
AC105460.1	4.4006	-3.04066	1.27e-06	3.14e-06
LINC01854	3.51318	-3.91635	1.31e-06	3.24e-06
AC006270.2	4.13416	-3.18772	1.31e-06	3.25e-06
CACNA1C-IT3	4.04905	-3.67235	1.32e-06	3.28e-06
PSG7	4.2238	-3.52277	1.35e-06	3.34e-06
AL356364.1	4.248	-3.58509	1.35e-06	3.34e-06
RN7SL466P	3.83227	-3.87209	1.35e-06	3.36e-06
RN7SL801P	3.58226	-3.73841	1.4e-06	3.47e-06
AC026117.1	3.73482	-3.83266	1.42e-06	3.5e-06
RN7SL643P	3.80732	-3.88014	1.44e-06	3.54e-06
RN7SL191P	3.85	-3.85994	1.44e-06	3.56e-06
SNRPGP18	4.2516	-2.77488	1.44e-06	3.56e-06
RN7SKP189	4.62927	-3.30948	1.44e-06	3.56e-06
SOX1	3.76301	-2.05353	1.48e-06	3.65e-06
MED15P9	3.74873	-3.25947	1.55e-06	3.8e-06
RN7SL273P	3.51252	-3.4275	1.63e-06	3.99e-06
ZNF729	3.5662	-3.12014	1.64e-06	4.03e-06
LINC02826	3.56894	-3.71822	1.64e-06	4.03e-06
GSG1L2	3.99221	-3.42101	1.67e-06	4.1e-06
AL034349.1	3.71796	-2.89778	1.67e-06	4.1e-06
ESX1	3.81968	-3.68279	1.71e-06	4.18e-06
RAD51AP1P1	4.11752	-3.13526	1.71e-06	4.19e-06
EDDM3CP	3.80203	-3.88447	1.75e-06	4.28e-06
AC024405.2	3.74807	-3.8666	1.79e-06	4.36e-06
RN7SKP90	3.80313	-3.40146	1.81e-06	4.42e-06
RNU2-61P	4.04859	-3.77005	1.87e-06	4.55e-06
AL008638.2	4.46638	-3.43831	1.9e-06	4.63e-06
AC012568.1	3.62217	-3.15512	1.99e-06	4.82e-06
AC104232.2	3.82032	-3.28843	2e-06	4.84e-06
FER1L6-AS1	4.26194	-2.98204	2.04e-06	4.93e-06
SSX3	4.13558	-3.57251	2.05e-06	4.95e-06
LINC02303	3.78486	-2.601	2.23e-06	5.36e-06
EIF1AXP2	3.93138	-3.56863	2.24e-06	5.38e-06
AF254983.1	3.79086	-3.72503	2.31e-06	5.55e-06
LINC01886	4.05325	-2.35472	2.4e-06	5.74e-06
RN7SL791P	3.94587	-3.73836	2.44e-06	5.84e-06
MARCHF11	4.33983	-1.76022	2.45e-06	5.85e-06
AC022022.2	3.90574	-2.86491	2.46e-06	5.89e-06
GPR26	3.56488	-1.02316	2.48e-06	5.94e-06
AC093001.1	4.12809	-1.22752	2.54e-06	6.06e-06
AL159987.1	4.46328	-2.57024	2.56e-06	6.11e-06
AC010997.6	3.66771	-1.75151	2.65e-06	6.32e-06
RNU1-89P	3.89145	-3.83514	2.68e-06	6.37e-06
RNU1-11P	4.86952	-2.03654	2.69e-06	6.39e-06
AL031767.1	4.30095	-3.21807	2.79e-06	6.62e-06
AC022973.1	3.71508	-3.56173	2.82e-06	6.69e-06
NDUFA8P1	3.62678	-3.43367	2.83e-06	6.71e-06
AC104332.1	3.8228	-2.42871	2.88e-06	6.83e-06
RN7SL7P	3.89218	-3.60697	2.92e-06	6.9e-06
5_8S_rRNA	4.36784	-3.2909	2.97e-06	7.01e-06
AL139327.1	5.01869	-2.03034	3.14e-06	7.4e-06
AL118556.2	3.6282	-3.32421	3.17e-06	7.46e-06
LINC02385	3.52405	-2.74562	3.24e-06	7.62e-06
AC106744.1	4.03966	-3.53178	3.35e-06	7.87e-06
PSG2	4.21245	-3.01834	3.39e-06	7.94e-06
YBX1P7	3.78621	-3.35864	3.42e-06	8.02e-06
AC130895.1	3.61974	-2.48787	3.46e-06	8.11e-06
SCGB2A2	3.89853	-3.44897	3.73e-06	8.68e-06
RN7SL464P	4.0558	-3.53813	3.79e-06	8.81e-06
HMGB3P18	3.7572	-3.88853	3.8e-06	8.85e-06
LINC00879	4.26627	-3.44257	4.08e-06	9.46e-06
PNMA6F	3.53469	-3.40552	4.17e-06	9.66e-06
RN7SL14P	3.6989	-3.68615	4.24e-06	9.82e-06
AC093730.1	3.53095	-3.68209	4.27e-06	9.88e-06
AC023824.1	4.36106	-2.28977	4.39e-06	1.01e-05
AL390318.1	4.97422	-2.26209	4.39e-06	1.02e-05
AL157402.2	4.00493	-2.29385	4.43e-06	1.02e-05
AL135878.1	3.53403	-3.43578	4.62e-06	1.06e-05
RNVU1-28	3.99923	-3.55291	4.8e-06	1.1e-05
AC090220.1	3.50269	-2.69509	4.88e-06	1.12e-05
DIMT1P1	3.87296	-3.84025	5.37e-06	1.23e-05
AL365258.1	3.63031	-3.4624	5.56e-06	1.27e-05
LPP-AS1	3.69285	-2.82459	5.65e-06	1.28e-05
RAD17P2	3.60768	-2.43466	5.67e-06	1.29e-05
RN7SL480P	3.9625	-2.87049	5.75e-06	1.31e-05
CEACAM18	4.10098	-3.21868	6.1e-06	1.38e-05
TSPY2	3.95156	-3.62304	6.23e-06	1.41e-05
OR7A19P	3.57495	-3.42709	6.65e-06	1.5e-05
FP671120.3	3.72029	-3.9091	6.94e-06	1.56e-05
RN7SL18P	3.52932	-3.57108	6.98e-06	1.57e-05
ZNF679	3.65594	-3.50411	6.99e-06	1.57e-05
RN7SKP186	4.43872	-3.3035	7.02e-06	1.58e-05
RNU2-23P	4.32363	-3.342	7.12e-06	1.6e-05
RN7SL314P	4.03399	-3.64106	7.4e-06	1.66e-05
AC018541.1	4.5442	-3.30022	7.42e-06	1.66e-05
LARP1BP1	3.60546	-3.62607	7.49e-06	1.68e-05
AL445687.2	3.89104	-3.73783	7.56e-06	1.69e-05
PPP1R2P10	3.87528	-3.24289	7.75e-06	1.73e-05
RN7SKP8	3.73502	-2.9825	8.02e-06	1.79e-05
CHCHD4P5	3.59631	-3.24084	8.07e-06	1.8e-05
TSPY1	3.68737	-3.87345	8.11e-06	1.81e-05
AC068535.1	3.75453	-3.91477	8.21e-06	1.83e-05
AC114878.1	3.74566	-3.413	8.34e-06	1.86e-05
AL606517.2	4.25157	-3.24468	8.61e-06	1.91e-05
AC120349.2	3.66465	-3.43269	8.69e-06	1.93e-05
ZNF722P	3.70678	-3.39769	8.78e-06	1.95e-05
OR4A16	3.57036	-3.92628	8.79e-06	1.95e-05
DRAXINP1	3.55874	-3.90072	8.94e-06	1.98e-05
RN7SL735P	3.62151	-2.96521	8.95e-06	1.98e-05
EIF4E2P1	3.63245	-3.74263	9.19e-06	2.03e-05
DEFA8P	4.96038	-1.46787	9.42e-06	2.08e-05
MTND5P26	3.98672	-3.01717	9.42e-06	2.08e-05
DEFA9P	4.95962	-1.62804	9.52e-06	2.1e-05
MTCYBP32	3.99422	-3.28167	9.55e-06	2.11e-05
CRCT1	3.69699	-2.36878	9.64e-06	2.13e-05
RN7SL197P	3.74452	-3.3542	1.02e-05	2.23e-05
AC096741.1	3.6335	-2.10896	1.03e-05	2.26e-05
RN7SKP48	4.02269	-3.64845	1.07e-05	2.35e-05
APOC3	4.00441	-1.56771	1.12e-05	2.46e-05
AC113398.2	4.15084	-3.31485	1.24e-05	2.69e-05
TUNAR	3.89151	-1.35797	1.25e-05	2.72e-05
WFDC5	3.53149	1.69501	1.44e-05	3.1e-05
REG1B	3.58317	-3.67877	1.53e-05	3.27e-05
PRORY	4.1167	-3.54972	1.6e-05	3.42e-05
AL162582.1	3.78388	-3.62475	1.6e-05	3.42e-05
AL161658.1	4.02128	-1.1386	1.6e-05	3.43e-05
AP000462.2	4.07528	-2.55753	1.62e-05	3.46e-05
ZNF75BP	3.9828	-3.38484	1.78e-05	3.79e-05
MIR3140	3.57838	-3.60574	1.79e-05	3.8e-05
AC144521.1	3.50327	-3.52767	2.01e-05	4.26e-05
RNY4	3.91114	-3.30031	2.07e-05	4.36e-05
CASP14	3.85305	1.0608	2.16e-05	4.55e-05
PRODH2	3.78437	-1.87353	2.22e-05	4.67e-05
AC010359.1	3.6094	-3.46197	2.37e-05	4.96e-05
RN7SL630P	3.5938	-3.40549	2.38e-05	4.97e-05
GKN1	3.69902	-1.94213	2.39e-05	4.99e-05
DPPA5	3.53291	-2.8947	2.74e-05	5.69e-05
AC106744.2	3.58447	-3.75386	2.92e-05	6.04e-05
RN7SL646P	3.51985	-3.59965	3.1e-05	6.39e-05
RNU6-82P	3.54226	-3.48772	3.38e-05	6.93e-05
AC015574.1	3.53876	-3.43194	3.55e-05	7.24e-05
SNORA35B	3.58089	-3.77508	3.62e-05	7.39e-05
FP236383.5	3.95326	-2.24789	4.03e-05	8.16e-05
RNA5-8SP5	3.8317	-3.77367	4.13e-05	8.36e-05
REG3A	4.0936	-2.27944	4.18e-05	8.47e-05
RNU2-59P	3.62987	-3.11305	6.76e-05	0.000132627
MIR3976HG	3.57401	-3.69068	6.85e-05	0.000134361
CRISP1	3.62396	-3.63691	0.000102505	0.000196202
BX842568.1	3.78563	-3.13671	0.000162678	0.000302507

## Sheet: Table S2
Table S2 GO analysis of the DEGs
Category	Term	Count	%	PValue	Genes	List Total	Pop Hits	Pop Total	Fold Enrichment	Bonferroni	Benjamini	FDR
GOTERM_BP_DIRECT	GO:0045944~positive regulation of transcription from RNA polymerase II promoter	67	5.61609	0.000130697	TOP2A, BARHL2, CSF3, ONECUT2, ONECUT3, PTPRN, ONECUT1, RAX, HOXC13, NR2E1, HOXC11, FGF4, HOXA10, SOX1, SALL1, ZIC3, ZIC1, ANKRD1, TNFSF11, MYBL2, PITX2, PITX1, FOXD3, FOXH1, EN2, SOX11, FOXL2, HNF1A, ETV4, POU3F2, ISL1, POU3F3, GREM1, MYCN, GAL, HOXB9, RFX6, PAX7, VGLL2, SHOX2, HOXD13, ASCL1, BARX1, BARX2, NEUROD1, STRA8, SOHLH1, SOHLH2, OTX2, CGA, NKX2-5, ATOH1, NKX2-2, TFAP2A, TFAP2D, DMRT1, CD…	713	981	16792	1.60849	0.277519	0.014844	0.0147186
GOTERM_BP_DIRECT	GO:0006366~transcription from RNA polymerase II promoter	45	3.772	7.43748e-06	BARHL2, ONECUT2, ONECUT3, ONECUT1, RAX, YBX2, HOXD13, HOXC13, BARX1, BARX2, HOXC11, HOXA10, NEUROD1, SOX1, SOHLH1, SALL3, ZIC3, SOHLH2, ZIC1, OTX2, MYBL2, NKX2-5, PITX2, PITX1, NKX3-2, ATOH1, TFAP2A, CDX2, DMRT1, FOXH1, PDX1, POU6F2, HMGA2, SOX11, FOXL2, GRHL3, HNF1A, ETV4, POU3F2, POU4F1, ISL1, PHOX2B, CTCFL, RFX6, LHX1	713	513	16792	2.06589	0.0183271	0.00179717	0.00178199
GOTERM_BP_DIRECT	GO:0030154~cell differentiation	40	3.35289	3.50795e-05	PIWIL3, ONECUT2, ONECUT3, PTPRQ, ONECUT1, USH1C, CPLX2, FGF3, TAF7L, SOHLH1, ZIC2, ZIC3, SOHLH2, ZIC1, MAEL, PRAME, MYBL2, NKX2-5, KRT6A, CDX2, FOXL2, ZIC5, TSPY2, ETV4, DLK1, TSPY1, TEX19, THEG, CENPF, SPATA16, SMOC1, DMRTC2, CDHR5, ANKS4B, TFF1, SIM1, INHA, INA, HMX2, BRDT	713	462	16792	2.03906	0.0835468	0.00670828	0.00665161
GOTERM_BP_DIRECT	GO:0000122~negative regulation of transcription from RNA polymerase II promoter	39	3.26907	0.0962669	FOXE1, SHOX2, PRDM13, NR2E1, ASCL1, BARX2, AURKB, DMBX1, SOX3, SALL1, ZNF280A, MAGEA1, MAEL, ANKRD1, NKX2-5, PITX2, FEZF1, NKX3-2, TFAP2A, FOXD3, SKOR2, OLIG3, CDX2, DMRT1, ESX1, FOXH1, PDX1, SOX14, HMGA2, SOX11, FOXL2, NR0B1, HNF1A, VAX1, POU4F1, ISL1, ISX, TBX15, INSM1	713	720	16792	1.27569	1	1	0.991952
GOTERM_BP_DIRECT	GO:0007275~multicellular organism development	38	3.18525	0.00155324	REG3A, RTL1, PIWIL1, CSF3, PIWIL3, CRABP1, HMGB3, HOXD13, HOXC12, FGF3, HOXA11, DLL3, HOXA10, TAF7L, RS1, MYCNOS, SOHLH2, MAEL, NKX1-2, OTX2, NKX2-4, INSL4, CDX2, POU6F2, EN2, HMGA2, F2, WNT16, DSPP, DKK4, MMP11, THEG, SPATA16, TLX1, PAEP, DPPA5, HOXB8, TRIM54	713	521	16792	1.71775	0.979056	0.116638	0.115652
GOTERM_BP_DIRECT	GO:0008284~positive regulation of cell proliferation	33	2.76614	0.00514276	CSF3, CHRM1, REG1A, KIF14, FGF3, HOXC10, FGF4, INS, FGF5, CDC20, MYCNOS, PRAME, NKX2-5, CGA, KRT6A, FGF21, CDX2, WNT3A, PDX1, IL31RA, AKR1C2, SOX11, VEGFD, F2, NCCRP1, POU3F2, ISL1, POU3F3, GREM1, FGF19, BIRC5, CRLF1, HMX2	713	466	16792	1.66779	0.999997	0.255155	0.252999
GOTERM_BP_DIRECT	GO:0006508~proteolysis	31	2.59849	0.0354883	PCSK1, PRSS1, FCN3, TMPRSS4, KLK8, CASP14, IGHG4, PRSS3, PRSS2, PRSS29P, IGKV2-40, TMPRSS11A, OVCH1, MMP1, ECEL1, MMP3, IGKV1D-33, F2, TMPRSS11E, PRSS56, MMP10, ADAMTS20, KLK12, TMPRSS11D, ADAM2, MMP12, MMP11, IGKV2D-28, MMP13, PROC, CPS1	713	500	16792	1.46017	1	0.909525	0.901842
GOTERM_BP_DIRECT	GO:0006810~transport	27	2.2632	0.00380386	CLIC5, CRABP2, CHRNA5, CRABP1, AFP, SLC5A5, SYNPR, SLC25A48, GABRR1, OBP2A, LCN15, CNGA3, NPTX1, SLC15A1, ABCC2, GABRA5, ABCA4, GABRA3, SLCO1B7, GABRG2, ATP4A, GJB2, FABP4, FABP7, ALB, PAEP, CDH17	713	348	16792	1.82725	0.999924	0.20926	0.207492
GOTERM_BP_DIRECT	GO:0007283~spermatogenesis	25	2.09556	0.0390772	PIWIL3, CELF3, YBX2, VCX, DUSP13, HOXA11, HOXA10, TAF7L, BCL2L10, SOHLH1, SOHLH2, MAEL, HORMAD1, SPAG11B, DMRT1, HMGA2, NR0B1, TSPY2, CDC25C, TSPY1, TEX19, ASPM, THEG, SPATA16, BRDT	713	385	16792	1.5293	1	0.96184	0.953715
GOTERM_BP_DIRECT	GO:0007267~cell-cell signaling	23	1.92791	0.00123626	PCSK1, CALCA, PCDH8, IL36G, GPR50, BARX1, CXCL14, FGF3, FGF4, INS, FGF5, GREM1, GJB2, EFNA2, SST, LHX1, IAPP, INHA, TAC1, CGA, IL17C, FGF21, INSL4	713	254	16792	2.13259	0.953879	0.102445	0.10158
GOTERM_CC_DIRECT	GO:0005576~extracellular region	169	14.166	1.41277e-28	PGLYRP4, LY6K, PRSS1, PGLYRP3, FCN3, CSF3, CLEC4M, SPINT4, CXCL14, FGF3, FGF4, LIPF, FGF5, IGHG4, BPIFA1, BPIFA2, TNFSF11, TNR, LIPK, PRSS3, PRSS2, CHGB, SPINK4, IGFBP1, SPAG11B, SPAG11A, PSG1, PSG3, PSG2, IGKV1D-33, PRAP1, MUC3A, PSG9, DKK4, PSG8, IGKV2D-28, PSG5, PSG7, PSG6, HHIPL2, CLPSL1, FETUB, IAPP, CLPSL2, S100A7, COL17A1, CALCA, CALCB, NXPH4, LYPD1, PSG11, NTS, AGER, KLK6, IL22RA2, LCN15,…	785	1610	18224	2.43688	5.43916e-26	5.43916e-26	5.38265e-26
GOTERM_CC_DIRECT	GO:0005615~extracellular space	122	10.2263	3.79193e-15	CSF3, CXCL14, LGALS4, FGF5, RS1, IGHG4, BPIFA1, TNFSF11, PRSS3, PRSS2, IGFBP1, SPINK1, MIA, OLFM4, MUC3A, C3P1, FETUB, IAPP, HDGFL1, FREM3, REG3A, CALCA, LYPD3, KLK8, KLK6, IL22RA2, LYPD8, KRT33A, SCUBE1, OTOG, IL36RN, TAC3, TAC1, FGF21, AMBP, WNT3A, DEFA5, IL36G, A2ML1, IGFL1, CP, ATP4A, TF, BPIFB2, PROC, TCN1, ALB, SPINK13, CRISP1, PCSK1, MSTN, SERPINA7, SERPINA4, UCN2, SOSTDC1, MUC13, CA6, GAS…	785	1347	18224	2.10265	1.45328e-12	7.29947e-13	7.22363e-13
GOTERM_CC_DIRECT	GO:0005887~integral component of plasma membrane	74	6.20285	0.0590372	CHRM1, CLEC4M, KCNK9, KCNC2, SLC2A1, SLC2A2, SLCO6A1, PTPRH, SLC7A10, SLC6A3, SLC6A4, GABRR1, PRLHR, TNFSF11, SLC39A5, CNGA3, SLC18A3, TMPRSS11A, SLC15A1, ABCC2, UGT1A1, COL25A1, EPHA8, SLC6A15, SLC6A11, TM4SF5, HTR3B, TMPRSS11E, GABRG2, SSTR4, TMPRSS11D, SSTR5, ADAM2, MTNR1A, PLPP4, CEACAM5, B3GNT3, RHCG, LCT, COL17A1, SLC24A2, NPSR1, OR10H1, EPHA10, GPR87, CHRNA9, KCNA4, AGER, CRHR1, SLC5A5, KC…	785	1415	18224	1.21409	1	0.909173	0.899728
GOTERM_CC_DIRECT	GO:0030054~cell junction	27	2.2632	0.0951369	GRIA1, RGS17, CHRM1, CHRNA2, CHRNA5, KCNC2, PTPRN, CHRNA9, RIMS2, SYNPR, GABRR1, GLRA3, NETO1, GABRQ, GABRA5, LGI3, PCDH8, GABRA3, IL31RA, HTR3A, GABRG3, GABRG2, SYT7, SYT12, GJB6, CDHR2, CNTNAP4	785	459	18224	1.36561	1	1	0.992188
GOTERM_CC_DIRECT	GO:0072562~blood microparticle	24	2.01174	1.44938e-07	FGB, FGA, APCS, FCN3, PRSS1, AMBP, AHSG, CD5L, APOA2, SLC2A1, HBB, HBA2, APOA4, HBA1, IGKV1D-33, F2, CP, IGHG4, TF, IGKV2D-28, ALB, HRG, GC, IGKV2-40	785	152	18224	3.66557	5.57995e-05	1.86004e-05	1.84071e-05
GOTERM_CC_DIRECT	GO:0005578~proteinaceous extracellular matrix	22	1.84409	0.00610478	COL17A1, MYOC, WNT3A, MMP1, COL11A1, COL22A1, TFPI2, MMP3, WNT16, COCH, MMP10, ADAMTS20, DSPP, MMP12, MMP11, MMP13, EPYC, SMOC1, TNR, COL10A1, CILP2, CTHRC1	785	268	18224	1.90573	0.905348	0.262346	0.25962
GOTERM_CC_DIRECT	GO:0016324~apical plasma membrane	22	1.84409	0.014779	SLC14A2, ABCC2, KCNC2, MUC17, LHFPL5, SLC2A1, SLC2A2, MUC3A, TF, SLC9A4, NPC1L1, GJB6, CDHR2, CA4, OTOG, MUC13, CDHR5, RHCG, LCT, CD300LG, SLC17A4, GPIHBP1	785	291	18224	1.75511	0.996761	0.489344	0.48426
GOTERM_CC_DIRECT	GO:0045211~postsynaptic membrane	17	1.42498	0.0203364	GABRQ, GRIA1, CHRM1, CHRNA2, CHRNA5, KCNC2, GABRA5, PCDH8, GABRA3, CHRNA9, HTR3A, HTR3B, GABRG3, GABRG2, GABRR1, GLRA3, NETO1	785	211	18224	1.87043	0.999633	0.489344	0.48426
GOTERM_CC_DIRECT	GO:0005788~endoplasmic reticulum lumen	16	1.34116	0.019027	COL17A1, PDIA2, WNT3A, COL25A1, COL11A1, COL22A1, APOA2, APOA4, GCG, F2, GIP, INS, COL2A1, PROC, ARSH, COL10A1	785	192	18224	1.93461	0.999386	0.489344	0.48426
GOTERM_CC_DIRECT	GO:0005667~transcription factor complex	16	1.34116	0.019843	SKOR2, TFAP2D, ONECUT3, FOXH1, HOXD12, HNF1A, HOXB13, POU3F2, BARX2, HOXA11, HOXA10, DMBX1, ANKRD1, NKX2-5, PITX2, PITX1	785	193	18224	1.92458	0.999555	0.489344	0.48426
GOTERM_MF_DIRECT	GO:0043565~sequence-specific DNA binding	64	5.36463	3.07972e-14	FOXE1, FOXI3, HNF4G, HOXC13, NR2E1, HOXC12, HOXA13, HOXC10, HOXA11, HOXA10, DMBX1, SALL1, SALL3, ZIC3, MAEL, NKX1-2, PITX2, PITX1, MNX1, EMX2, ESX1, FOXH1, EN2, SOX14, FOXL2, ETV4, ISL1, POU3F3, DMRTA2, HOXB9, PAX7, HOXB8, HMX2, DLX6, FOXG1, SHOX2, HOXD12, HOXD11, HOXB13, NEUROD1, ALX3, OTX2, NKX2-5, NKX2-4, ATOH1, NKX2-2, TFAP2A, FOXB1, CDX2, IRX4, NR0B1, EVX1, GRHL3, POU4F1, CTCFL, ISX, FOXR2, …	714	518	16881	2.92113	2.23883e-11	2.24512e-11	2.20816e-11
GOTERM_MF_DIRECT	GO:0005509~calcium ion binding	52	4.35876	0.000192297	CALML5, GUCA1A, CALML3, CALB1, PRSS3, PRSS2, MMP1, TESC, TNNC1, MMP3, ANXA10, F2, MMP10, MMP12, MMP11, MMP13, MELK, CDHR2, PADI3, CDHR5, DSG3, DSG4, CDH17, PADI1, CDH18, S100A7, SLC24A2, CRP, APCS, C2CD4A, DLL3, FSTL5, CLEC3B, SCUBE1, PLA2G2F, CGREF1, AOC1, REG4, PCDH8, SYT14, SYT13, DLK1, SYT7, DSPP, VIL1, CABYR, PROC, SYT12, CPS1, SMOC1, S100P, UMODL1	714	717	16881	1.71468	0.130646	0.0140184	0.0137877
GOTERM_MF_DIRECT	GO:0003700~transcription factor activity, sequence-specific DNA binding	52	4.35876	0.0541992	FOXE1, HNF4G, RAX, NR2E1, DMBX1, SOX3, SOX1, SALL1, ZIC2, SALL3, ZIC3, ZIC1, MYBL2, PITX2, PITX1, MNX1, FOXD3, FOXH1, SOX11, FOXL2, HNF1A, ETV4, POU3F2, POU3F3, POU5F2, DMRTA2, MYCN, PAX7, HOXB8, DLX6, HOXD13, ASCL1, BARX1, NEUROD1, OTX2, NKX2-5, ATOH1, NKX2-2, TFAP2A, CDX2, DMRT1, POU6F2, PDX1, EVX1, PHOX2A, TBX15, LHX1, TBX10, DMRTC2, INSM1, SIM1, VSX1	714	961	16881	1.27932	1	0.910773	0.895781
GOTERM_MF_DIRECT	GO:0042803~protein homodimerization activity	41	3.43671	0.0560333	TOP2A, UGT1A10, KCNK9, CRYBA2, ASCL1, SLC6A4, DMBX1, BCL2L10, TERT, MUC13, UGT1A3, TRPM8, NKX2-5, PITX2, XDH, UGT1A8, UGT1A7, NTSR1, UGT1A6, TFAP2A, AOC1, UGT1A1, AMBP, DMRT1, TESC, TNNC1, APOA2, APOA4, VEGFD, NR0B1, HNF1A, OLFM4, VIL1, TBX15, DMRTA2, CENPF, CLEC2A, CEACAM5, GPD1, DMRTC2, BIRC5	714	730	16881	1.32789	1	0.910773	0.895781
GOTERM_MF_DIRECT	GO:0000978~RNA polymerase II core promoter proximal region sequence-specific DNA binding	35	2.93378	7.76037e-06	ONECUT2, RAX, HOXD13, ASCL1, HOXC11, HOXA10, NEUROD1, SOX1, SALL1, ZIC3, ZIC1, OTX2, MYBL2, NKX2-5, PITX2, FEZF1, PITX1, NKX3-2, ATOH1, TFAP2A, SKOR2, PDX1, FOXL2, ETV4, POU3F2, ISL1, PHOX2B, CTCFL, TBX15, RFX6, ZNF716, TLX1, ZNF679, INSM1, ZNF695	714	355	16881	2.33099	0.00563364	0.000808187	0.000794883
GOTERM_MF_DIRECT	GO:0001077~transcriptional activator activity, RNA polymerase II core promoter proximal region sequence-specific binding	32	2.68231	2.04486e-08	BARHL2, ONECUT2, ONECUT3, ONECUT1, RAX, HOXD13, HOXC13, NR2E1, HOXC11, HOXA10, NEUROD1, SOX1, ZIC3, ZIC1, OTX2, MYBL2, NKX2-5, PITX2, PITX1, ATOH1, TFAP2A, HMGA2, SOX11, FOXL2, HNF1A, ETV4, POU3F2, POU4F1, ISL1, PHOX2B, CTCFL, TLX1	714	236	16881	3.20581	1.48865e-05	4.96901e-06	4.88722e-06
GOTERM_MF_DIRECT	GO:0046982~protein heterodimerization activity	28	2.34702	0.0583889	TOP2A, UGT1A10, KCNK9, CENPA, NEUROD1, DMBX1, BCL2L10, SCUBE1, UGT1A3, NKX2-5, UGT1A8, UGT1A7, NTSR1, UGT1A6, UGT1A1, DMRT1, GAD1, PDX1, APOA2, SOX14, HNF1A, TBX15, DMRTA2, CABYR, BIRC5, SIM1, INHA, CRLF1	714	465	16881	1.42366	1	0.910773	0.895781
GOTERM_MF_DIRECT	GO:0004252~serine-type endopeptidase activity	27	2.2632	3.10567e-05	PCSK1, PRSS1, FCN3, TMPRSS4, KLK8, KLK6, IGHG4, PRSS3, PRSS2, PRSS29P, IGKV2-40, TMPRSS11A, OVCH1, MMP1, MMP3, IGKV1D-33, F2, TMPRSS11E, PRSS56, MMP10, KLK12, TMPRSS11D, MMP12, MMP11, IGKV2D-28, MMP13, PROC	714	255	16881	2.50336	0.0223559	0.00251559	0.00247418
GOTERM_MF_DIRECT	GO:0005102~receptor binding	22	1.84409	0.0726094	FGB, IGFBP1, FGA, CALCA, MSTN, WNT3A, NXPH4, GCG, F2, ABCA12, SLC6A3, UCN2, NPY, NMU, IAPP, TAC3, LBP, NXPH1, INHA, HRG, TAC1, INSL4	714	353	16881	1.47349	1	0.980227	0.964091
GOTERM_MF_DIRECT	GO:0005198~structural molecule activity	20	1.67645	0.00877551	FGB, FGA, KRT81, SPRR3, KRT3, CRCT1, KRT75, KRT83, CLDN6, KRT33A, CLDN10, KRT16, KRT14, OTOG, PLAC4, SPRR1A, IVL, SPRR1B, KRT6A, SPRR2D	714	247	16881	1.9144	0.998366	0.295082	0.290225

## Sheet: Table S3
Table S3 KEGG pathway enrichment analysis of the DEGs
Category	Term	Count	%	PValue	Genes	List Total	Pop Hits	Pop Total	Fold Enrichment	Bonferroni	Benjamini	FDR
KEGG_PATHWAY	hsa00053:Ascorbate and aldarate metabolism	12	1.00587	5.91e-10	UGT2B10, MIOX, UGT1A10, UGT2B11, UGT1A1, UGT2B15, UGT2A3, UGT2B28, UGT1A3, UGT1A8, UGT1A7, UGT1A6	241	27	6879	12.686	1.21e-07	7.11e-08	6.77e-08
KEGG_PATHWAY	hsa00140:Steroid hormone biosynthesis	16	1.34116	6.97e-10	UGT2B10, UGT1A10, UGT2B11, UGT1A1, HSD3B2, UGT2B15, AKR1C2, UGT2B28, AKR1C4, CYP11B1, CYP1A2, UGT2A3, UGT1A3, UGT1A8, UGT1A7, UGT1A6	241	58	6879	7.87409	1.42e-07	7.11e-08	6.77e-08
KEGG_PATHWAY	hsa04950:Maturity onset diabetes of the young	11	0.922045	7.21e-09	NEUROD1, RFX6, ONECUT1, PDX1, HNF4G, SLC2A2, IAPP, HNF1A, MNX1, NKX2-2, INS	241	26	6879	12.0761	1.47e-06	3.72e-07	3.53e-07
KEGG_PATHWAY	hsa00040:Pentose and glucuronate interconversions	12	1.00587	7.29e-09	UGT2B10, UGT1A10, UGT2B11, AKR1B10, UGT1A1, UGT2B15, UGT2A3, UGT2B28, UGT1A3, UGT1A8, UGT1A7, UGT1A6	241	33	6879	10.3795	1.49e-06	3.72e-07	3.53e-07
KEGG_PATHWAY	hsa00860:Porphyrin and chlorophyll metabolism	13	1.08969	1.08e-08	UGT2B10, UGT1A10, ALAS2, UGT2B11, UGT1A1, UGT2B15, UGT2B28, CP, UGT2A3, UGT1A3, UGT1A8, UGT1A7, UGT1A6	241	42	6879	8.83491	2.2e-06	4.41e-07	4.19e-07
KEGG_PATHWAY	hsa00980:Metabolism of xenobiotics by cytochrome P450	16	1.34116	2.6e-08	UGT2B10, UGT1A10, UGT2B11, UGT1A1, UGT2B15, AKR1C2, UGT2B28, AKR1C4, AKR7A3, CYP2B6, CYP1A2, UGT2A3, UGT1A3, UGT1A8, UGT1A7, UGT1A6	241	74	6879	6.17158	5.29e-06	8.82e-07	8.39e-07
KEGG_PATHWAY	hsa04080:Neuroactive ligand-receptor interaction	29	2.43085	3.01e-07	GRIA1, PRSS1, CHRM1, CHRNA2, CHRNA5, CHRNA9, CRHR1, GABRR1, GLRA3, HRH3, KISS1R, PRLHR, PRSS3, CGA, PRSS2, NTSR1, NTSR2, GABRQ, GABRA5, GCGR, GABRA3, GPR50, F2, GABRG3, GABRG2, SSTR4, SSTR5, GH2, MTNR1A	241	277	6879	2.98832	6.13e-05	8.56e-06	8.14e-06
KEGG_PATHWAY	hsa00983:Drug metabolism - other enzymes	12	1.00587	3.36e-07	UGT2B10, UGT1A10, UGT2B11, UGT1A1, UGT2B15, UGT2A3, UGT2B28, UGT1A3, UGT1A8, XDH, UGT1A7, UGT1A6	241	46	6879	7.44615	6.85e-05	8.56e-06	8.14e-06
KEGG_PATHWAY	hsa00830:Retinol metabolism	13	1.08969	1.62e-06	UGT2B10, UGT1A10, UGT2B11, UGT1A1, UGT2B15, UGT2B28, CYP2B6, CYP1A2, UGT2A3, UGT1A3, UGT1A8, UGT1A7, UGT1A6	241	64	6879	5.79791	0.000331	3.67e-05	3.49e-05
KEGG_PATHWAY	hsa00982:Drug metabolism - cytochrome P450	13	1.08969	3.17e-06	UGT2B10, UGT1A10, UGT2B11, UGT1A1, UGT2B15, UGT2B28, CYP2B6, CYP1A2, UGT2A3, UGT1A3, UGT1A8, UGT1A7, UGT1A6	241	68	6879	5.45686	0.000647	6.48e-05	6.16e-05
KEGG_PATHWAY	hsa05204:Chemical carcinogenesis	12	1.00587	9.24e-05	UGT2B10, UGT1A10, UGT2B11, UGT1A1, UGT2B15, CYP1A2, UGT2A3, UGT2B28, UGT1A3, UGT1A8, UGT1A7, UGT1A6	241	80	6879	4.28154	0.018674	0.0017136	0.0016296
KEGG_PATHWAY	hsa05033:Nicotine addiction	7	0.586756	0.00240165	GABRQ, GRIA1, GABRR1, GABRA5, GABRA3, GABRG3, GABRG2	241	40	6879	4.99512	0.387695	0.040828	0.0388266
KEGG_PATHWAY	hsa04727:GABAergic synapse	9	0.754401	0.00928564	GABRQ, GNGT1, GABRR1, GNG4, GABRA5, GAD1, GABRA3, GABRG3, GABRG2	241	85	6879	3.02226	0.850897	0.145713	0.13857
KEGG_PATHWAY	hsa04974:Protein digestion and absorption	9	0.754401	0.0113477	COL17A1, SLC15A1, PRSS1, COL2A1, COL11A1, COL22A1, COL10A1, PRSS3, PRSS2	241	88	6879	2.91923	0.902525	0.165352	0.157246
KEGG_PATHWAY	hsa04151:PI3K-Akt signaling pathway	21	1.76027	0.0172593	ANGPT4, CSF3, CHRM1, G6PC, COL11A1, VEGFD, FGF3, FGF4, INS, GH2, GNGT1, FGF5, COL2A1, EFNA2, PPP2R2C, GNG4, EIF4E1B, FGF19, SPP1, TNR, FGF21	241	345	6879	1.73743	0.971322	0.234727	0.22322
KEGG_PATHWAY	hsa00910:Nitrogen metabolism	4	0.335289	0.0198539	CPS1, CA4, CA6, CA9	241	17	6879	6.71613	0.983277	0.253138	0.240729
KEGG_PATHWAY	hsa04723:Retrograde endocannabinoid signaling	9	0.754401	0.0243129	GABRQ, GNGT1, GRIA1, GABRR1, GNG4, GABRA5, GABRA3, GABRG3, GABRG2	241	101	6879	2.54349	0.993403	0.291755	0.277453
KEGG_PATHWAY	hsa04014:Ras signaling pathway	15	1.25733	0.0263265	PLA2G2F, ANGPT4, CALML5, VEGFD, CALML3, RASAL1, FGF3, FGF4, INS, GNGT1, FGF5, EFNA2, GNG4, FGF19, FGF21	241	226	6879	1.89448	0.995672	0.298367	0.283742
KEGG_PATHWAY	hsa04911:Insulin secretion	8	0.670578	0.0283381	RIMS2, KCNU1, SLC2A1, PDX1, SLC2A2, GCG, GIP, INS	241	85	6879	2.68645	0.997161	0.304262	0.289347
KEGG_PATHWAY	hsa05032:Morphine addiction	8	0.670578	0.0390686	GABRQ, GNGT1, GABRR1, GNG4, GABRA5, GABRA3, GABRG3, GABRG2	241	91	6879	2.50932	0.999705	0.3985	0.378965

## Sheet: Table S4
Table S4 PPI Network analysis of the DEGs
#node1	node2	node1_string_id	node2_string_id	neighborhood_on_chromosome	gene_fusion	phylogenetic_cooccurrence	homology	coexpression	experimentally_determined_interaction	database_annotated	automated_textmining	combined_score
A1CF	SPP2	9606.ENSP00000378868	9606.ENSP00000168148	0	0	0	0	0.471	0	0	0	0.471
A1CF	APOBEC1	9606.ENSP00000378868	9606.ENSP00000229304	0	0	0	0	0.077	0.434	0.9	0.875	0.992
A1CF	HRG	9606.ENSP00000378868	9606.ENSP00000232003	0	0	0	0	0.642	0	0	0.05	0.645
A1CF	PROC	9606.ENSP00000378868	9606.ENSP00000234071	0	0	0	0	0.486	0.05	0	0	0.49
A1CF	FETUB	9606.ENSP00000378868	9606.ENSP00000265029	0	0	0	0	0.589	0	0	0.05	0.593
A1CF	HGD	9606.ENSP00000378868	9606.ENSP00000283871	0	0	0	0	0.673	0	0	0.059	0.679
A1CF	TM4SF4	9606.ENSP00000378868	9606.ENSP00000305852	0	0	0	0	0.596	0	0	0	0.596
A1CF	FGB	9606.ENSP00000378868	9606.ENSP00000306099	0	0	0	0	0.494	0	0	0	0.494
A1CF	FGA	9606.ENSP00000378868	9606.ENSP00000306361	0	0	0	0	0.657	0	0	0	0.657
A1CF	SLC2A2	9606.ENSP00000378868	9606.ENSP00000323568	0	0	0	0	0.597	0	0	0	0.597
A1CF	APOA4	9606.ENSP00000378868	9606.ENSP00000350425	0	0	0	0	0.679	0	0	0	0.679
A1CF	F13B	9606.ENSP00000378868	9606.ENSP00000356382	0	0	0	0	0.643	0	0	0	0.643
A1CF	ABCC2	9606.ENSP00000378868	9606.ENSP00000359478	0	0	0	0	0.573	0	0	0	0.573
A1CF	AHSG	9606.ENSP00000378868	9606.ENSP00000393887	0	0	0	0	0.413	0	0	0.068	0.43
A1CF	FGL1	9606.ENSP00000378868	9606.ENSP00000381133	0	0	0	0	0.169	0	0	0.367	0.452
A1CF	MYH6	9606.ENSP00000378868	9606.ENSP00000386041	0	0	0	0	0	0	0	0.532	0.532
A1CF	PAH	9606.ENSP00000378868	9606.ENSP00000448059	0	0	0	0	0.576	0	0	0	0.576
A1CF	GC	9606.ENSP00000378868	9606.ENSP00000421725	0	0	0	0	0.62	0	0	0	0.62
A1CF	HNF4G	9606.ENSP00000378868	9606.ENSP00000379701	0	0	0	0	0.369	0	0	0.567	0.715
A2ML1	DSG3	9606.ENSP00000299698	9606.ENSP00000257189	0	0	0	0	0.098	0	0	0.37	0.408
A2ML1	KLK6	9606.ENSP00000299698	9606.ENSP00000366047	0	0	0	0	0	0.05	0	0.717	0.719
ABCA12	PGLYRP3	9606.ENSP00000272895	9606.ENSP00000290722	0	0	0	0	0.1	0	0	0.414	0.45
ABCA12	IL36RN	9606.ENSP00000272895	9606.ENSP00000376896	0	0	0	0	0.066	0	0	0.445	0.459
ABCA12	CASP14	9606.ENSP00000272895	9606.ENSP00000393417	0	0	0	0	0.049	0	0	0.46	0.465
ABCA12	IVL	9606.ENSP00000272895	9606.ENSP00000357753	0	0	0	0	0.164	0	0	0.451	0.522
ABCA4	VAX1	9606.ENSP00000359245	9606.ENSP00000358207	0	0	0	0	0.061	0.05	0	0.557	0.57
ABCA4	STRA6	9606.ENSP00000359245	9606.ENSP00000456609	0	0	0	0	0	0	0	0.42	0.42
ABCA4	FOXE1	9606.ENSP00000359245	9606.ENSP00000364265	0	0	0	0	0	0	0	0.448	0.448
ABCA4	CNGA3	9606.ENSP00000359245	9606.ENSP00000377140	0	0	0	0	0	0	0	0.532	0.532
ABCA4	GUCA1A	9606.ENSP00000359245	9606.ENSP00000377784	0	0	0	0	0	0.067	0	0.577	0.588
ABCA4	RS1	9606.ENSP00000359245	9606.ENSP00000369320	0	0	0	0	0	0	0	0.589	0.589
ABCC2	HRG	9606.ENSP00000359478	9606.ENSP00000232003	0	0	0	0	0.552	0	0	0	0.552
ABCC2	UGT2A3	9606.ENSP00000359478	9606.ENSP00000251566	0	0	0	0	0.176	0.05	0	0.426	0.511
ABCC2	SLCO1B1	9606.ENSP00000359478	9606.ENSP00000256958	0	0	0	0	0.135	0	0	0.806	0.825
ABCC2	SLCO1B3	9606.ENSP00000359478	9606.ENSP00000261196	0	0	0	0	0.131	0	0	0.796	0.815
ABCC2	HGD	9606.ENSP00000359478	9606.ENSP00000283871	0	0	0	0	0.583	0	0	0.041	0.583
ABCC2	ALB	9606.ENSP00000359478	9606.ENSP00000295897	0	0	0	0	0.181	0	0	0.407	0.494
ABCC2	UGT1A6	9606.ENSP00000359478	9606.ENSP00000303174	0	0	0	0	0.258	0.05	0	0.697	0.768
ABCC2	UGT1A8	9606.ENSP00000359478	9606.ENSP00000304845	0	0	0	0	0.235	0.05	0	0.7	0.762
ABCC2	FGA	9606.ENSP00000359478	9606.ENSP00000306361	0	0	0	0	0.404	0	0	0	0.404
ABCC2	F2	9606.ENSP00000359478	9606.ENSP00000308541	0	0	0	0	0.337	0	0	0.243	0.477
ABCC2	ENSG00000258947	9606.ENSP00000359478	9606.ENSP00000320295	0	0	0	0	0	0.379	0	0.094	0.413
ABCC2	SLC2A2	9606.ENSP00000359478	9606.ENSP00000323568	0	0	0	0	0.621	0	0	0.138	0.659
ABCC2	CYP2B6	9606.ENSP00000359478	9606.ENSP00000324648	0	0	0	0	0.125	0	0	0.53	0.571
ABCC2	CYP1A2	9606.ENSP00000359478	9606.ENSP00000342007	0	0	0	0	0	0	0	0.419	0.419
ABCC2	UGT1A10	9606.ENSP00000359478	9606.ENSP00000343838	0	0	0	0	0.235	0.05	0	0.249	0.407
ABCC2	APOA4	9606.ENSP00000359478	9606.ENSP00000350425	0	0	0	0	0.533	0	0	0.155	0.588
ABCC2	SLC30A10	9606.ENSP00000359478	9606.ENSP00000355893	0	0	0	0	0.1	0	0	0.523	0.552
ABCC2	F13B	9606.ENSP00000359478	9606.ENSP00000356382	0	0	0	0	0.652	0	0	0	0.652
ABCC2	AFP	9606.ENSP00000359478	9606.ENSP00000379138	0	0	0	0	0.293	0	0	0.221	0.426
ABCC2	AHSG	9606.ENSP00000359478	9606.ENSP00000393887	0	0	0	0	0.33	0	0	0.244	0.472
ABCC2	SLC15A1	9606.ENSP00000359478	9606.ENSP00000365686	0	0	0	0	0.056	0.057	0	0.543	0.557
ABCC2	UGT1A3	9606.ENSP00000359478	9606.ENSP00000418532	0	0	0	0	0.257	0.05	0	0.449	0.577
ABCC2	UGT1A7	9606.ENSP00000359478	9606.ENSP00000362525	0	0	0	0	0.235	0.05	0	0.49	0.597
ABCC2	XDH	9606.ENSP00000359478	9606.ENSP00000368727	0	0	0	0	0.144	0	0	0.639	0.678
ABCC2	UGT1A1	9606.ENSP00000359478	9606.ENSP00000362549	0	0	0	0	0.235	0.05	0	0.699	0.762
ACTL6B	HMGB3	9606.ENSP00000160382	9606.ENSP00000359393	0	0	0	0	0.064	0.165	0	0.302	0.407
ACTL6B	CHGB	9606.ENSP00000160382	9606.ENSP00000368244	0	0	0	0	0.351	0	0	0.14	0.418
ACTL6B	HRH3	9606.ENSP00000160382	9606.ENSP00000342560	0	0	0	0	0.427	0	0	0	0.427
ACTL6B	SYNPR	9606.ENSP00000160382	9606.ENSP00000418994	0	0	0	0	0.385	0.06	0	0.115	0.444
ACTL6B	CA10	9606.ENSP00000160382	9606.ENSP00000405388	0	0	0	0	0.453	0	0	0	0.453
ACTL6B	NEUROD1	9606.ENSP00000160382	9606.ENSP00000295108	0	0	0	0	0.229	0	0	0.324	0.457
ACTL6B	ONECUT2	9606.ENSP00000160382	9606.ENSP00000419185	0	0	0	0	0.062	0	0	0.468	0.479
ACTL6B	CPLX2	9606.ENSP00000160382	9606.ENSP00000352544	0	0	0	0	0.496	0	0	0	0.496
ACTL6B	CELF3	9606.ENSP00000160382	9606.ENSP00000290583	0	0	0	0	0.53	0	0	0	0.53
ACTL6B	DNMT3A	9606.ENSP00000160382	9606.ENSP00000264709	0	0	0	0	0	0	0.9	0.069	0.902
ACTL8	MAGEA10	9606.ENSP00000364555	9606.ENSP00000244096	0	0	0	0	0	0	0	0.473	0.473
ACTL8	CTAG2	9606.ENSP00000364555	9606.ENSP00000247306	0	0	0	0	0.063	0	0	0.4	0.413
ACTL8	MAGEC1	9606.ENSP00000364555	9606.ENSP00000285879	0	0	0	0	0.102	0	0	0.527	0.557
ACTL8	SAGE1	9606.ENSP00000364555	9606.ENSP00000323191	0	0	0	0	0.083	0	0	0.4	0.426
ACTL8	MAGEA1	9606.ENSP00000364555	9606.ENSP00000349085	0	0	0	0	0.14	0	0	0.445	0.502
ACTL8	PLAC1	9606.ENSP00000364555	9606.ENSP00000352173	0	0	0	0	0.091	0	0	0.426	0.455
ACTL8	MAGEC2	9606.ENSP00000364555	9606.ENSP00000354660	0	0	0	0	0.123	0	0	0.448	0.495
ACTL8	HORMAD1	9606.ENSP00000364555	9606.ENSP00000355167	0	0	0	0	0.061	0	0	0.53	0.539
ACTL8	GAGE2A	9606.ENSP00000364555	9606.ENSP00000355421	0	0	0	0	0.139	0	0	0.478	0.531
ACTL8	CSAG1	9606.ENSP00000364555	9606.ENSP00000359310	0	0	0	0	0.127	0	0	0.44	0.49
ACTL8	PASD1	9606.ENSP00000364555	9606.ENSP00000359382	0	0	0	0	0.14	0	0	0.53	0.578
ACTL8	CT83	9606.ENSP00000364555	9606.ENSP00000360961	0	0	0	0	0.088	0	0	0.582	0.602
ACTL8	CTCFL	9606.ENSP00000364555	9606.ENSP00000415579	0	0	0	0	0.096	0.085	0	0.4	0.46
ACTL8	SLCO6A1	9606.ENSP00000364555	9606.ENSP00000421339	0	0	0	0	0	0	0	0.539	0.539
ACTL8	XAGE1A	9606.ENSP00000364555	9606.ENSP00000364752	0	0	0	0	0	0	0	0.576	0.576
ADAM2	YBX2	9606.ENSP00000265708	9606.ENSP00000007699	0	0	0	0	0.061	0	0	0.418	0.43
ADAM2	FETUB	9606.ENSP00000265708	9606.ENSP00000265029	0	0	0	0	0	0	0	0.545	0.545
ADAM2	SLCO6A1	9606.ENSP00000265708	9606.ENSP00000421339	0	0	0	0	0.062	0	0	0.398	0.411
ADAM2	PAGE2B	9606.ENSP00000265708	9606.ENSP00000364110	0	0	0	0	0	0	0	0.429	0.429
ADAM2	MAGEC1	9606.ENSP00000265708	9606.ENSP00000285879	0	0	0	0	0.076	0	0	0.527	0.544
ADAM2	BRDT	9606.ENSP00000265708	9606.ENSP00000387822	0	0	0	0	0.061	0	0	0.577	0.585
ADAM2	MAGEC2	9606.ENSP00000265708	9606.ENSP00000354660	0	0	0	0	0.069	0	0	0.588	0.6
ADAM2	PAGE5	9606.ENSP00000265708	9606.ENSP00000289619	0	0	0	0	0	0	0	0.656	0.656
ADAM2	CRISP1	9606.ENSP00000265708	9606.ENSP00000338276	0	0	0	0	0	0	0	0.674	0.674
ADAM2	SAGE1	9606.ENSP00000265708	9606.ENSP00000323191	0	0	0	0	0.071	0	0	0.677	0.687
ADM2	MIOX	9606.ENSP00000379087	9606.ENSP00000216075	0	0	0	0	0.136	0	0	0.757	0.781
ADM2	IAPP	9606.ENSP00000379087	9606.ENSP00000240652	0	0	0	0	0	0	0.9	0.686	0.967
ADM2	GNGT1	9606.ENSP00000379087	9606.ENSP00000248572	0	0	0	0	0	0	0.9	0	0.9
ADM2	CALCA	9606.ENSP00000379087	9606.ENSP00000331746	0	0	0	0	0	0	0.9	0.733	0.972
ADM2	GIP	9606.ENSP00000379087	9606.ENSP00000350005	0	0	0	0	0	0	0.9	0	0.9
ADM2	NPSR1	9606.ENSP00000379087	9606.ENSP00000370950	0	0	0	0	0	0	0.9	0.064	0.902
ADM2	GNG4	9606.ENSP00000379087	9606.ENSP00000375727	0	0	0	0	0	0	0.9	0	0.9
ADM2	CGA	9606.ENSP00000379087	9606.ENSP00000482232	0	0	0	0	0	0	0.9	0.058	0.901
ADM2	CRHR1	9606.ENSP00000379087	9606.ENSP00000381333	0	0	0	0	0	0	0.9	0.088	0.904
ADM2	GCG	9606.ENSP00000379087	9606.ENSP00000387662	0	0	0	0	0	0	0.9	0.172	0.913
ADM2	GCGR	9606.ENSP00000379087	9606.ENSP00000383558	0	0	0	0	0	0	0.9	0.209	0.917
ADM2	CALCB	9606.ENSP00000379087	9606.ENSP00000433490	0	0	0	0	0	0	0.9	0.554	0.953
AFP	KRT20	9606.ENSP00000379138	9606.ENSP00000167588	0	0	0	0	0	0	0	0.475	0.475
AFP	SPP2	9606.ENSP00000379138	9606.ENSP00000168148	0	0	0	0	0.226	0	0.9	0.075	0.922
AFP	FGF4	9606.ENSP00000379138	9606.ENSP00000168712	0	0	0	0	0.212	0	0	0.562	0.64
AFP	BPIFB2	9606.ENSP00000379138	9606.ENSP00000170150	0	0	0	0	0.53	0	0.9	0	0.951
AFP	CEACAM5	9606.ENSP00000379138	9606.ENSP00000221992	0	0	0	0	0	0	0	0.92	0.92
AFP	APOC3	9606.ENSP00000379138	9606.ENSP00000227667	0	0	0	0	0.562	0	0	0.171	0.622
AFP	PROC	9606.ENSP00000379138	9606.ENSP00000234071	0	0	0	0	0.217	0	0.9	0.125	0.925
AFP	VGF	9606.ENSP00000379138	9606.ENSP00000249330	0	0	0	0	0	0	0.9	0.071	0.903
AFP	HBA2	9606.ENSP00000379138	9606.ENSP00000251595	0	0	0	0	0	0	0	0.421	0.421
AFP	G6PC	9606.ENSP00000379138	9606.ENSP00000253801	0	0	0	0	0.08	0	0	0.441	0.464
AFP	CRP	9606.ENSP00000379138	9606.ENSP00000255030	0	0	0	0	0.063	0	0	0.588	0.597
AFP	NTS	9606.ENSP00000379138	9606.ENSP00000256010	0	0	0	0	0.736	0	0	0.25	0.793
AFP	HNF1A	9606.ENSP00000379138	9606.ENSP00000257555	0	0	0	0	0.063	0	0	0.416	0.43
AFP	IGF2BP3	9606.ENSP00000379138	9606.ENSP00000258729	0	0	0	0	0.245	0	0	0.245	0.405
AFP	CP	9606.ENSP00000379138	9606.ENSP00000264613	0	0	0	0	0.123	0	0.9	0.557	0.957
AFP	AMBP	9606.ENSP00000379138	9606.ENSP00000265132	0	0	0	0	0.842	0	0	0.138	0.858
AFP	IGFBP1	9606.ENSP00000379138	9606.ENSP00000275525	0	0	0	0	0.761	0	0.9	0.399	0.984
AFP	FGF19	9606.ENSP00000379138	9606.ENSP00000294312	0	0	0	0	0.07	0	0	0.409	0.427
AFP	ALPI	9606.ENSP00000379138	9606.ENSP00000295463	0	0	0	0	0.065	0	0	0.389	0.405
AFP	ALB	9606.ENSP00000379138	9606.ENSP00000295897	0	0	0	0.915	0.551	0	0.9	0.931	0.956
AFP	T	9606.ENSP00000379138	9606.ENSP00000296946	0	0	0	0	0	0	0	0.539	0.539
AFP	ONECUT1	9606.ENSP00000379138	9606.ENSP00000302630	0	0	0	0	0.063	0	0	0.543	0.554
AFP	FGB	9606.ENSP00000379138	9606.ENSP00000306099	0	0	0	0	0.413	0	0	0.168	0.491
AFP	FGA	9606.ENSP00000379138	9606.ENSP00000306361	0	0	0	0	0.577	0	0.9	0.247	0.965
AFP	F2	9606.ENSP00000379138	9606.ENSP00000308541	0	0	0	0	0.662	0	0	0.837	0.942
AFP	TERT	9606.ENSP00000379138	9606.ENSP00000309572	0	0	0	0	0.076	0	0	0.52	0.538
AFP	FGF5	9606.ENSP00000379138	9606.ENSP00000311697	0	0	0	0	0	0	0	0.503	0.503
AFP	ENSG00000258947	9606.ENSP00000379138	9606.ENSP00000320295	0	0	0	0	0	0	0	0.453	0.453
AFP	HBA1	9606.ENSP00000379138	9606.ENSP00000322421	0	0	0	0	0.065	0	0	0.42	0.435
AFP	CYP2B6	9606.ENSP00000379138	9606.ENSP00000324648	0	0	0	0	0.064	0	0	0.409	0.423
AFP	NKX2-5	9606.ENSP00000379138	9606.ENSP00000327758	0	0	0	0	0	0	0	0.48	0.48
AFP	SERPINA7	9606.ENSP00000379138	9606.ENSP00000329374	0	0	0	0	0.549	0	0	0.25	0.647
AFP	SOX1	9606.ENSP00000379138	9606.ENSP00000330218	0	0	0	0	0	0	0	0.579	0.579
AFP	DLK1	9606.ENSP00000379138	9606.ENSP00000340292	0	0	0	0	0.518	0	0	0.441	0.719
AFP	MAGEA1	9606.ENSP00000379138	9606.ENSP00000349085	0	0	0	0	0.172	0	0	0.399	0.481
AFP	SPTSSB	9606.ENSP00000379138	9606.ENSP00000352097	0	0	0	0	0.663	0	0	0	0.663
AFP	APOA2	9606.ENSP00000379138	9606.ENSP00000356969	0	0	0	0	0.875	0	0.9	0.237	0.989
AFP	SOX3	9606.ENSP00000379138	9606.ENSP00000359567	0	0	0	0	0.068	0	0	0.509	0.523
AFP	LIN28A	9606.ENSP00000379138	9606.ENSP00000363314	0	0	0	0	0.333	0	0	0.504	0.655
AFP	CHGB	9606.ENSP00000379138	9606.ENSP00000368244	0	0	0	0	0	0	0.9	0	0.9
AFP	CDX2	9606.ENSP00000379138	9606.ENSP00000370408	0	0	0	0	0.055	0	0	0.63	0.635
AFP	SPP1	9606.ENSP00000379138	9606.ENSP00000378517	0	0	0	0	0.078	0	0.9	0.481	0.948
AFP	GC	9606.ENSP00000379138	9606.ENSP00000421725	0	0	0	0.59	0.196	0	0	0.643	0.402
AFP	CDKN2A	9606.ENSP00000379138	9606.ENSP00000418915	0	0	0	0	0	0	0	0.413	0.413
AFP	MAGEA3	9606.ENSP00000379138	9606.ENSP00000473093	0	0	0	0	0.197	0	0	0.31	0.422
AFP	PAH	9606.ENSP00000379138	9606.ENSP00000448059	0	0	0	0	0.337	0	0	0.203	0.449
AFP	PAEP	9606.ENSP00000379138	9606.ENSP00000417898	0	0	0	0	0	0	0	0.45	0.45
AFP	FGL1	9606.ENSP00000379138	9606.ENSP00000381133	0	0	0	0	0.535	0	0	0.103	0.565
AFP	INS	9606.ENSP00000379138	9606.ENSP00000380432	0	0	0	0	0	0	0	0.573	0.573
AFP	TF	9606.ENSP00000379138	9606.ENSP00000385834	0	0	0	0	0.398	0	0.9	0.484	0.966
AFP	AHSG	9606.ENSP00000379138	9606.ENSP00000393887	0	0	0	0	0.958	0	0.9	0.486	0.997
AGER	CLIC5	9606.ENSP00000364210	9606.ENSP00000185206	0	0	0	0	0.049	0	0	0.489	0.493
AGER	CRP	9606.ENSP00000364210	9606.ENSP00000255030	0	0	0	0	0	0	0	0.745	0.745
AGER	ALB	9606.ENSP00000364210	9606.ENSP00000295897	0	0	0	0	0	0	0	0.543	0.543
AGER	S100P	9606.ENSP00000364210	9606.ENSP00000296370	0	0	0	0	0	0.941	0	0.23	0.953
AGER	SFTPC	9606.ENSP00000364210	9606.ENSP00000316152	0	0	0	0	0.169	0	0	0.345	0.432
AGER	S100A7	9606.ENSP00000364210	9606.ENSP00000357712	0	0	0	0	0	0	0	0.44	0.44
AGER	HMGB3	9606.ENSP00000364210	9606.ENSP00000359393	0	0	0	0	0	0.084	0	0.42	0.446
AGER	MUC5AC	9606.ENSP00000364210	9606.ENSP00000485659	0	0	0	0	0	0	0	0.441	0.441
AGER	INS	9606.ENSP00000364210	9606.ENSP00000380432	0	0	0	0	0	0	0	0.551	0.551
AHSG	SPP2	9606.ENSP00000393887	9606.ENSP00000168148	0	0	0	0	0.58	0	0.9	0.714	0.986
AHSG	BPIFB2	9606.ENSP00000393887	9606.ENSP00000170150	0	0	0	0	0.552	0	0.9	0	0.953
AHSG	EEF1A2	9606.ENSP00000393887	9606.ENSP00000217182	0	0	0	0	0.077	0	0	0.622	0.636
AHSG	APOC3	9606.ENSP00000393887	9606.ENSP00000227667	0	0	0	0	0.799	0	0	0.327	0.859
AHSG	HRG	9606.ENSP00000393887	9606.ENSP00000232003	0	0	0	0	0.67	0	0.9	0.644	0.987
AHSG	PROC	9606.ENSP00000393887	9606.ENSP00000234071	0	0	0	0	0.742	0	0.9	0.128	0.975
AHSG	VGF	9606.ENSP00000393887	9606.ENSP00000249330	0	0	0	0	0	0	0.9	0.07	0.903
AHSG	CRP	9606.ENSP00000393887	9606.ENSP00000255030	0	0	0	0	0.109	0	0	0.67	0.693
AHSG	NTS	9606.ENSP00000393887	9606.ENSP00000256010	0	0	0	0	0.616	0	0	0.064	0.625
AHSG	CP	9606.ENSP00000393887	9606.ENSP00000264613	0	0	0	0	0.157	0	0.9	0.609	0.964
AHSG	FETUB	9606.ENSP00000393887	9606.ENSP00000265029	0	0	0	0.649	0.648	0	0	0.708	0.734
AHSG	AMBP	9606.ENSP00000393887	9606.ENSP00000265132	0	0	0	0	0.958	0	0	0.526	0.979
AHSG	UGT2B10	9606.ENSP00000393887	9606.ENSP00000265403	0	0	0	0	0.623	0	0	0	0.623
AHSG	TM4SF5	9606.ENSP00000393887	9606.ENSP00000270560	0	0	0	0	0.533	0	0	0	0.533
AHSG	IGFBP1	9606.ENSP00000393887	9606.ENSP00000275525	0	0	0	0	0.788	0	0.9	0.25	0.982
AHSG	ALB	9606.ENSP00000393887	9606.ENSP00000295897	0	0	0	0	0.959	0.043	0.9	0.674	0.998
AHSG	FIGF	9606.ENSP00000393887	9606.ENSP00000297904	0	0	0	0	0	0	0.9	0	0.9
AHSG	PRODH2	9606.ENSP00000393887	9606.ENSP00000301175	0	0	0	0	0.441	0	0	0	0.441
AHSG	TM4SF4	9606.ENSP00000393887	9606.ENSP00000305852	0	0	0	0	0.645	0	0	0	0.645
AHSG	FGB	9606.ENSP00000393887	9606.ENSP00000306099	0	0	0	0	0.654	0	0.9	0.293	0.973
AHSG	FGA	9606.ENSP00000393887	9606.ENSP00000306361	0	0	0	0	0.835	0	0.9	0.433	0.989
AHSG	F2	9606.ENSP00000393887	9606.ENSP00000308541	0	0	0	0	0.959	0	0	0.376	0.973
AHSG	SERPINA7	9606.ENSP00000393887	9606.ENSP00000329374	0	0	0	0	0.777	0	0	0.318	0.841
AHSG	DLK1	9606.ENSP00000393887	9606.ENSP00000340292	0	0	0	0	0.529	0	0	0.056	0.536
AHSG	CYP1A2	9606.ENSP00000393887	9606.ENSP00000342007	0	0	0	0	0.063	0	0	0.413	0.427
AHSG	APOA4	9606.ENSP00000393887	9606.ENSP00000350425	0	0	0	0	0.655	0	0	0.533	0.832
AHSG	SPTSSB	9606.ENSP00000393887	9606.ENSP00000352097	0	0	0	0	0.558	0	0	0	0.558
AHSG	F13B	9606.ENSP00000393887	9606.ENSP00000356382	0	0	0	0	0.623	0	0	0.57	0.831
AHSG	APOA2	9606.ENSP00000393887	9606.ENSP00000356969	0	0	0	0	0.918	0	0.9	0.455	0.995
AHSG	CD5L	9606.ENSP00000393887	9606.ENSP00000357156	0	0	0	0	0.102	0	0	0.396	0.434
AHSG	PASD1	9606.ENSP00000393887	9606.ENSP00000359382	0	0	0	0	0.5	0	0	0	0.499
AHSG	ANGPTL3	9606.ENSP00000393887	9606.ENSP00000360170	0	0	0	0	0.577	0	0	0.198	0.646
AHSG	CHGB	9606.ENSP00000393887	9606.ENSP00000368244	0	0	0	0	0	0	0.9	0.049	0.9
AHSG	SPP1	9606.ENSP00000393887	9606.ENSP00000378517	0	0	0	0	0.076	0	0.9	0.669	0.966
AHSG	INS	9606.ENSP00000393887	9606.ENSP00000380432	0	0	0	0	0	0	0	0.659	0.659
AHSG	FGL1	9606.ENSP00000393887	9606.ENSP00000381133	0	0	0	0	0.571	0	0	0	0.571
AHSG	TF	9606.ENSP00000393887	9606.ENSP00000385834	0	0	0	0	0.68	0	0.9	0.571	0.985
AHSG	GCG	9606.ENSP00000393887	9606.ENSP00000387662	0	0	0	0	0	0	0	0.477	0.477
AHSG	SERPINA4	9606.ENSP00000393887	9606.ENSP00000450838	0	0	0	0	0.412	0	0	0.082	0.437
AHSG	FGF21	9606.ENSP00000393887	9606.ENSP00000471477	0	0	0	0	0.062	0	0	0.511	0.521
AHSG	PAH	9606.ENSP00000393887	9606.ENSP00000448059	0	0	0	0	0.722	0	0	0	0.722
AHSG	GC	9606.ENSP00000393887	9606.ENSP00000421725	0	0	0	0	0.731	0	0	0.653	0.903
AKR1B10	G6PC	9606.ENSP00000352584	9606.ENSP00000253801	0	0	0	0	0.061	0	0.8	0.117	0.819
AKR1B10	LCT	9606.ENSP00000352584	9606.ENSP00000264162	0	0	0	0	0	0	0.9	0.092	0.905
AKR1B10	CHRNA5	9606.ENSP00000352584	9606.ENSP00000299565	0	0	0	0	0	0	0	0.5	0.499
AKR1B10	GPX2	9606.ENSP00000352584	9606.ENSP00000374265	0	0	0	0	0.207	0.05	0	0.323	0.446
AKR1B10	TAS2R38	9606.ENSP00000352584	9606.ENSP00000448219	0	0	0	0	0	0	0	0.526	0.526
AKR1B10	AKR1B15	9606.ENSP00000352584	9606.ENSP00000389289	0	0	0.449	0.982	0	0.519	0	0.669	0.528
AKR1B10	AKR7A3	9606.ENSP00000352584	9606.ENSP00000355377	0.057	0	0	0	0.086	0	0	0.523	0.553
AKR1B10	CHRNA2	9606.ENSP00000352584	9606.ENSP00000385026	0	0	0	0	0	0	0	0.574	0.574
AKR1B10	PAH	9606.ENSP00000352584	9606.ENSP00000448059	0	0	0	0	0.063	0	0.9	0.042	0.902
AKR1B15	AKR7A3	9606.ENSP00000389289	9606.ENSP00000355377	0.057	0	0	0	0.063	0	0	0.465	0.486
AKR1C2	UGT2A3	9606.ENSP00000370129	9606.ENSP00000251566	0	0	0	0	0.111	0	0.65	0.126	0.704
AKR1C2	UGT2B10	9606.ENSP00000370129	9606.ENSP00000265403	0	0	0	0	0.108	0	0.65	0.12	0.701
AKR1C2	UGT1A6	9606.ENSP00000370129	9606.ENSP00000303174	0	0	0	0	0.109	0	0.65	0.156	0.714
AKR1C2	UGT1A8	9606.ENSP00000370129	9606.ENSP00000304845	0	0	0	0	0.055	0	0.65	0.112	0.68
AKR1C2	UGT2B28	9606.ENSP00000370129	9606.ENSP00000334276	0	0	0	0	0.082	0	0.65	0.221	0.727
AKR1C2	UGT2B15	9606.ENSP00000370129	9606.ENSP00000341045	0	0	0	0	0.082	0	0.65	0.533	0.837
AKR1C2	UGT1A10	9606.ENSP00000370129	9606.ENSP00000343838	0	0	0	0	0	0	0.65	0.049	0.652
AKR1C2	UGT1A7	9606.ENSP00000370129	9606.ENSP00000362525	0	0	0	0	0	0	0.65	0.08	0.664
AKR1C2	UGT1A1	9606.ENSP00000370129	9606.ENSP00000362549	0	0	0	0	0	0	0.65	0.111	0.675
AKR1C2	AKR1C4	9606.ENSP00000370129	9606.ENSP00000369814	0	0	0.449	0.98	0.066	0.86	0	0.905	0.867
AKR1C2	HSD3B2	9606.ENSP00000370129	9606.ENSP00000445122	0.043	0	0	0	0.064	0	0	0.551	0.562
AKR1C2	UGT1A3	9606.ENSP00000370129	9606.ENSP00000418532	0	0	0	0	0.078	0	0.65	0.088	0.68
AKR1C2	UGT2B11	9606.ENSP00000370129	9606.ENSP00000387683	0	0	0	0	0.082	0	0.65	0.13	0.696
AKR1C4	UGT2A3	9606.ENSP00000369814	9606.ENSP00000251566	0	0	0	0	0.113	0	0.65	0.172	0.721
AKR1C4	UGT2B10	9606.ENSP00000369814	9606.ENSP00000265403	0	0	0	0	0.132	0	0.65	0.287	0.764
AKR1C4	UGT1A6	9606.ENSP00000369814	9606.ENSP00000303174	0	0	0	0	0.089	0	0.65	0.193	0.72
AKR1C4	UGT1A8	9606.ENSP00000369814	9606.ENSP00000304845	0	0	0	0	0.055	0	0.65	0.219	0.719
AKR1C4	UGT2B28	9606.ENSP00000369814	9606.ENSP00000334276	0	0	0	0	0.082	0	0.65	0.046	0.666
AKR1C4	UGT2B15	9606.ENSP00000369814	9606.ENSP00000341045	0	0	0	0	0.104	0	0.65	0.285	0.756
AKR1C4	UGT1A10	9606.ENSP00000369814	9606.ENSP00000343838	0	0	0	0	0	0	0.65	0.099	0.671
AKR1C4	UGT1A7	9606.ENSP00000369814	9606.ENSP00000362525	0	0	0	0	0	0	0.65	0.097	0.67
AKR1C4	UGT1A1	9606.ENSP00000369814	9606.ENSP00000362549	0	0	0	0	0.064	0	0.65	0.218	0.721
AKR1C4	HSD3B2	9606.ENSP00000369814	9606.ENSP00000445122	0.043	0	0	0	0.064	0	0	0.43	0.445
AKR1C4	UGT1A3	9606.ENSP00000369814	9606.ENSP00000418532	0	0	0	0	0.114	0	0.65	0.115	0.701
AKR1C4	UGT2B11	9606.ENSP00000369814	9606.ENSP00000387683	0	0	0	0	0.082	0	0.65	0.199	0.72
AKR7A3	GPX2	9606.ENSP00000355377	9606.ENSP00000374265	0	0	0	0	0.109	0	0	0.369	0.414
AKR7A3	FAM83C	9606.ENSP00000355377	9606.ENSP00000363529	0	0	0	0	0	0.485	0	0	0.485
ALAS2	MIOX	9606.ENSP00000332369	9606.ENSP00000216075	0	0	0	0	0	0	0	0.416	0.416
ALAS2	HBA2	9606.ENSP00000332369	9606.ENSP00000251595	0	0	0	0	0.375	0	0	0.432	0.63
ALAS2	FGA	9606.ENSP00000332369	9606.ENSP00000306361	0	0	0	0	0.094	0	0	0.589	0.612
ALAS2	HBA1	9606.ENSP00000332369	9606.ENSP00000322421	0	0	0	0	0.407	0	0	0.446	0.657
ALAS2	HBB	9606.ENSP00000332369	9606.ENSP00000333994	0	0	0	0	0.257	0	0	0.592	0.684
ALB	CDH17	9606.ENSP00000295897	9606.ENSP00000027335	0	0	0	0	0	0	0	0.567	0.567
ALB	OTC	9606.ENSP00000295897	9606.ENSP00000039007	0	0	0	0	0.145	0	0	0.376	0.443
ALB	KRT14	9606.ENSP00000295897	9606.ENSP00000167586	0	0	0	0	0	0.043	0	0.455	0.456
ALB	SPP2	9606.ENSP00000295897	9606.ENSP00000168148	0	0	0	0	0.226	0	0.9	0.099	0.924
ALB	FGF4	9606.ENSP00000295897	9606.ENSP00000168712	0	0	0	0	0.111	0	0	0.547	0.58
ALB	BPIFB2	9606.ENSP00000295897	9606.ENSP00000170150	0	0	0	0	0.531	0	0.9	0.065	0.952
ALB	MMP11	9606.ENSP00000295897	9606.ENSP00000215743	0	0	0	0	0.055	0	0	0.526	0.533
ALB	EEF1A2	9606.ENSP00000295897	9606.ENSP00000217182	0	0	0	0	0.059	0	0	0.474	0.484
ALB	LBP	9606.ENSP00000295897	9606.ENSP00000217407	0	0	0	0	0.097	0	0	0.399	0.434
ALB	CST4	9606.ENSP00000295897	9606.ENSP00000217423	0	0	0	0	0	0	0	0.402	0.402
ALB	CEACAM5	9606.ENSP00000295897	9606.ENSP00000221992	0	0	0	0	0	0	0	0.675	0.675
ALB	CSF3	9606.ENSP00000295897	9606.ENSP00000225474	0	0	0	0	0	0	0	0.641	0.641
ALB	APOC3	9606.ENSP00000295897	9606.ENSP00000227667	0	0	0	0	0.724	0.104	0	0.471	0.858
ALB	ISL1	9606.ENSP00000295897	9606.ENSP00000230658	0	0	0	0	0	0	0	0.42	0.42
ALB	HRG	9606.ENSP00000295897	9606.ENSP00000232003	0	0	0	0	0.177	0	0.9	0.403	0.946
ALB	PROC	9606.ENSP00000295897	9606.ENSP00000234071	0	0	0	0	0.323	0	0.9	0.287	0.947
ALB	IAPP	9606.ENSP00000295897	9606.ENSP00000240652	0	0	0	0	0	0	0	0.433	0.433
ALB	VGF	9606.ENSP00000295897	9606.ENSP00000249330	0	0	0	0	0	0	0.9	0.167	0.913
ALB	UGT2A3	9606.ENSP00000295897	9606.ENSP00000251566	0	0	0	0	0.232	0	0	0.318	0.454
ALB	HBA2	9606.ENSP00000295897	9606.ENSP00000251595	0	0	0	0	0.058	0.043	0	0.63	0.637
ALB	G6PC	9606.ENSP00000295897	9606.ENSP00000253801	0	0	0	0	0.126	0	0	0.532	0.573
ALB	CRP	9606.ENSP00000295897	9606.ENSP00000255030	0	0	0	0	0.115	0	0	0.921	0.927
ALB	APCS	9606.ENSP00000295897	9606.ENSP00000255040	0	0	0	0	0.14	0	0	0.473	0.527
ALB	MYBPH	9606.ENSP00000295897	9606.ENSP00000255416	0	0	0	0	0	0	0	0.4	0.4
ALB	NTS	9606.ENSP00000295897	9606.ENSP00000256010	0	0	0	0	0.212	0	0	0.481	0.573
ALB	FABP4	9606.ENSP00000295897	9606.ENSP00000256104	0	0	0	0	0.061	0	0	0.445	0.456
ALB	SLCO1B1	9606.ENSP00000295897	9606.ENSP00000256958	0	0	0	0	0.168	0	0.9	0.611	0.964
ALB	HNF1A	9606.ENSP00000295897	9606.ENSP00000257555	0	0	0	0	0.092	0.379	0	0.438	0.655
ALB	IL36G	9606.ENSP00000295897	9606.ENSP00000259205	0	0	0	0	0	0	0	0.51	0.51
ALB	MMP13	9606.ENSP00000295897	9606.ENSP00000260302	0	0	0	0	0.055	0	0	0.488	0.495
ALB	BCL2L10	9606.ENSP00000295897	9606.ENSP00000260442	0	0	0	0	0.049	0	0	0.471	0.475
ALB	SLC6A4	9606.ENSP00000295897	9606.ENSP00000261707	0	0	0	0	0.051	0	0	0.429	0.435
ALB	ATP4A	9606.ENSP00000295897	9606.ENSP00000262623	0	0	0	0	0.062	0	0	0.63	0.638
ALB	IL37	9606.ENSP00000295897	9606.ENSP00000263326	0	0	0	0	0	0	0	0.55	0.55
ALB	LCT	9606.ENSP00000295897	9606.ENSP00000264162	0	0	0	0	0	0	0	0.415	0.414
ALB	CP	9606.ENSP00000295897	9606.ENSP00000264613	0	0	0	0	0.171	0	0.9	0.788	0.98
ALB	AMBP	9606.ENSP00000295897	9606.ENSP00000265132	0	0	0	0	0.783	0.379	0	0.577	0.938
ALB	UGT2B10	9606.ENSP00000295897	9606.ENSP00000265403	0	0	0	0	0.543	0	0	0.1	0.571
ALB	CALB1	9606.ENSP00000295897	9606.ENSP00000265431	0	0	0	0	0	0	0	0.586	0.586
ALB	GAL	9606.ENSP00000295897	9606.ENSP00000265643	0	0	0	0	0.077	0	0	0.417	0.439
ALB	RHCG	9606.ENSP00000295897	9606.ENSP00000268122	0	0	0	0	0.061	0	0	0.57	0.579
ALB	SLC6A3	9606.ENSP00000295897	9606.ENSP00000270349	0	0	0	0	0.051	0	0	0.425	0.431
ALB	FCN3	9606.ENSP00000295897	9606.ENSP00000270879	0	0	0	0	0.061	0	0	0.411	0.423
ALB	IGFBP1	9606.ENSP00000295897	9606.ENSP00000275525	0	0	0	0	0.533	0	0.9	0.4	0.969
ALB	MMP10	9606.ENSP00000295897	9606.ENSP00000279441	0	0	0	0	0.055	0	0	0.46	0.468
ALB	HGD	9606.ENSP00000295897	9606.ENSP00000283871	0	0	0	0	0.269	0	0	0.224	0.408
ALB	WNT3A	9606.ENSP00000295897	9606.ENSP00000284523	0	0	0	0	0	0	0	0.54	0.54
ALB	SST	9606.ENSP00000295897	9606.ENSP00000287641	0	0	0	0	0.062	0	0	0.613	0.621
ALB	FGF19	9606.ENSP00000295897	9606.ENSP00000294312	0	0	0	0	0	0	0	0.54	0.54
ALB	ALPI	9606.ENSP00000295897	9606.ENSP00000295463	0	0	0	0	0	0	0	0.695	0.695
ALB	DLK1	9606.ENSP00000295897	9606.ENSP00000340292	0	0	0	0	0.185	0	0	0.294	0.4
ALB	F13B	9606.ENSP00000295897	9606.ENSP00000356382	0	0	0	0	0.198	0	0	0.282	0.4
ALB	CA4	9606.ENSP00000295897	9606.ENSP00000300900	0	0	0	0	0	0	0	0.413	0.413
ALB	MMP12	9606.ENSP00000295897	9606.ENSP00000458585	0	0	0	0	0.055	0	0	0.41	0.419
ALB	ENSG00000258947	9606.ENSP00000295897	9606.ENSP00000320295	0	0	0	0	0	0	0	0.423	0.423
ALB	ONECUT1	9606.ENSP00000295897	9606.ENSP00000302630	0	0	0	0	0.096	0	0	0.402	0.437
ALB	MYH6	9606.ENSP00000295897	9606.ENSP00000386041	0	0	0	0	0.069	0	0	0.421	0.437
ALB	GIP	9606.ENSP00000295897	9606.ENSP00000350005	0	0	0	0	0	0	0	0.44	0.44
ALB	XDH	9606.ENSP00000295897	9606.ENSP00000368727	0	0	0	0	0.062	0	0	0.44	0.453
ALB	DDX53	9606.ENSP00000295897	9606.ENSP00000368667	0	0	0	0	0.059	0	0	0.445	0.455
ALB	FGF5	9606.ENSP00000295897	9606.ENSP00000311697	0	0	0	0	0	0	0	0.455	0.455
ALB	PAX7	9606.ENSP00000295897	9606.ENSP00000364524	0	0	0	0	0	0	0	0.459	0.459
ALB	MUC5B	9606.ENSP00000295897	9606.ENSP00000436812	0	0	0	0	0.09	0	0	0.431	0.46
ALB	GAD1	9606.ENSP00000295897	9606.ENSP00000350928	0	0	0	0	0	0	0	0.467	0.467
ALB	TNFSF11	9606.ENSP00000295897	9606.ENSP00000381775	0	0	0	0	0	0	0	0.481	0.481
ALB	HBB	9606.ENSP00000295897	9606.ENSP00000333994	0	0	0	0	0.061	0	0	0.475	0.485
ALB	HMGA2	9606.ENSP00000295897	9606.ENSP00000437621	0	0	0	0	0	0	0	0.485	0.485
ALB	PRSS3P2	9606.ENSP00000295897	9606.ENSP00000485444	0	0	0	0	0.1	0.043	0	0.46	0.494
ALB	APOA4	9606.ENSP00000295897	9606.ENSP00000350425	0	0	0	0	0.129	0.043	0	0.447	0.499
ALB	GAST	9606.ENSP00000295897	9606.ENSP00000331358	0	0	0	0	0	0	0	0.499	0.499
ALB	CPN1	9606.ENSP00000295897	9606.ENSP00000359446	0	0	0	0	0.315	0	0	0.299	0.5
ALB	UGT1A1	9606.ENSP00000295897	9606.ENSP00000362549	0	0	0	0	0.062	0	0	0.49	0.501
ALB	MUC5AC	9606.ENSP00000295897	9606.ENSP00000485659	0	0	0	0	0.087	0	0	0.482	0.507
ALB	MMP1	9606.ENSP00000295897	9606.ENSP00000322788	0	0	0	0	0.055	0	0	0.504	0.511
ALB	UGT1A6	9606.ENSP00000295897	9606.ENSP00000303174	0	0	0	0	0.084	0	0	0.491	0.514
ALB	IL36RN	9606.ENSP00000295897	9606.ENSP00000376896	0	0	0	0	0	0	0	0.519	0.519
ALB	TERT	9606.ENSP00000295897	9606.ENSP00000309572	0	0	0	0	0.061	0	0	0.514	0.524
ALB	UGT1A8	9606.ENSP00000295897	9606.ENSP00000304845	0	0	0	0	0.063	0	0	0.514	0.525
ALB	GRIA1	9606.ENSP00000295897	9606.ENSP00000428994	0	0	0	0	0	0	0	0.529	0.529
ALB	SLC2A1	9606.ENSP00000295897	9606.ENSP00000416293	0	0	0	0	0.062	0	0	0.519	0.529
ALB	CHAT	9606.ENSP00000295897	9606.ENSP00000337103	0	0	0	0	0	0	0	0.537	0.537
ALB	FGF3	9606.ENSP00000295897	9606.ENSP00000334122	0	0	0	0	0	0	0	0.543	0.543
ALB	NPY	9606.ENSP00000295897	9606.ENSP00000384364	0	0	0	0	0	0	0	0.549	0.549
ALB	CA9	9606.ENSP00000295897	9606.ENSP00000367608	0	0	0	0	0.152	0	0	0.498	0.556
ALB	CALCA	9606.ENSP00000295897	9606.ENSP00000331746	0	0	0	0	0	0	0	0.557	0.557
ALB	PRSS3	9606.ENSP00000295897	9606.ENSP00000354280	0	0	0	0	0.054	0.043	0	0.551	0.558
ALB	CYP1A2	9606.ENSP00000295897	9606.ENSP00000342007	0	0	0	0	0.062	0	0	0.548	0.558
ALB	PRSS1	9606.ENSP00000295897	9606.ENSP00000308720	0	0	0	0	0.192	0.043	0	0.476	0.559
ALB	CDKN2A	9606.ENSP00000295897	9606.ENSP00000418915	0	0	0	0	0	0	0	0.561	0.561
ALB	GC	9606.ENSP00000295897	9606.ENSP00000421725	0	0	0	0.658	0.431	0	0	0.728	0.57
ALB	PYCR1	9606.ENSP00000295897	9606.ENSP00000384949	0	0	0	0	0	0	0	0.571	0.571
ALB	TAC1	9606.ENSP00000295897	9606.ENSP00000321106	0	0	0	0	0	0	0	0.571	0.571
ALB	SLC2A2	9606.ENSP00000295897	9606.ENSP00000323568	0	0	0	0	0.255	0	0	0.448	0.572
ALB	LGALS4	9606.ENSP00000295897	9606.ENSP00000302100	0	0	0	0	0.059	0	0	0.579	0.587
ALB	FGF21	9606.ENSP00000295897	9606.ENSP00000471477	0	0	0	0	0.062	0	0	0.581	0.59
ALB	FGL1	9606.ENSP00000295897	9606.ENSP00000381133	0	0	0	0	0.553	0	0	0.127	0.593
ALB	SP8	9606.ENSP00000295897	9606.ENSP00000408792	0	0	0	0	0	0	0	0.603	0.603
ALB	PAH	9606.ENSP00000295897	9606.ENSP00000448059	0	0	0	0	0.369	0	0	0.399	0.604
ALB	SERPINB5	9606.ENSP00000295897	9606.ENSP00000372221	0	0	0	0	0.05	0	0	0.603	0.607
ALB	MMP3	9606.ENSP00000295897	9606.ENSP00000299855	0	0	0	0	0.055	0	0	0.603	0.608
ALB	COCH	9606.ENSP00000295897	9606.ENSP00000379862	0	0	0	0	0	0	0	0.618	0.618
ALB	CYP2B6	9606.ENSP00000295897	9606.ENSP00000324648	0	0	0	0	0.064	0	0	0.64	0.648
ALB	HBA1	9606.ENSP00000295897	9606.ENSP00000322421	0	0	0	0	0.092	0	0	0.63	0.649
ALB	GPX2	9606.ENSP00000295897	9606.ENSP00000374265	0	0	0	0	0.078	0	0	0.656	0.669
ALB	CPS1	9606.ENSP00000295897	9606.ENSP00000402608	0	0	0	0	0.244	0.379	0	0.354	0.67
ALB	GCG	9606.ENSP00000295897	9606.ENSP00000387662	0	0	0	0	0	0	0	0.704	0.704
ALB	SERPINA4	9606.ENSP00000295897	9606.ENSP00000450838	0	0	0	0	0.457	0	0	0.556	0.749
ALB	PAEP	9606.ENSP00000295897	9606.ENSP00000417898	0	0	0	0	0	0	0	0.77	0.77
ALB	HAVCR1	9606.ENSP00000295897	9606.ENSP00000344844	0	0	0	0	0.062	0	0	0.793	0.798
ALB	SERPINA7	9606.ENSP00000295897	9606.ENSP00000329374	0	0	0	0	0.64	0	0	0.677	0.878
ALB	CHGB	9606.ENSP00000295897	9606.ENSP00000368244	0	0	0	0	0	0	0.9	0.169	0.913
ALB	FIGF	9606.ENSP00000295897	9606.ENSP00000297904	0	0	0	0	0	0	0.9	0.285	0.925
ALB	INS	9606.ENSP00000295897	9606.ENSP00000380432	0	0	0	0	0	0	0	0.956	0.957
ALB	F2	9606.ENSP00000295897	9606.ENSP00000308541	0	0	0	0	0.624	0.043	0	0.897	0.96
ALB	FGB	9606.ENSP00000295897	9606.ENSP00000306099	0	0	0	0	0.617	0	0.9	0.266	0.969
ALB	SPP1	9606.ENSP00000295897	9606.ENSP00000378517	0	0	0	0	0.076	0	0.9	0.789	0.978
ALB	APOA2	9606.ENSP00000295897	9606.ENSP00000356969	0	0	0	0	0.6	0.043	0.9	0.571	0.981
ALB	TF	9606.ENSP00000295897	9606.ENSP00000385834	0	0	0	0	0.515	0.104	0.9	0.663	0.983
ALB	FGA	9606.ENSP00000295897	9606.ENSP00000306361	0	0	0	0	0.75	0.104	0.9	0.368	0.983
ALPI	CEACAM7	9606.ENSP00000295463	9606.ENSP00000006724	0	0	0	0	0	0	0.9	0.062	0.902
ALPI	CEACAM5	9606.ENSP00000295463	9606.ENSP00000221992	0	0	0	0	0.077	0	0.9	0.17	0.916
ALPI	INHA	9606.ENSP00000295463	9606.ENSP00000243786	0	0	0	0	0	0	0	0.644	0.644
ALPI	LYPD3	9606.ENSP00000295463	9606.ENSP00000244333	0	0	0	0	0	0	0.9	0	0.9
ALPI	LY6K	9606.ENSP00000295463	9606.ENSP00000292430	0	0	0	0	0	0	0.9	0	0.9
ALPI	EXO1	9606.ENSP00000295463	9606.ENSP00000355506	0	0	0	0	0	0	0	0.406	0.406
ALPI	INS	9606.ENSP00000295463	9606.ENSP00000380432	0	0	0	0	0	0	0	0.438	0.438
ALPI	F2	9606.ENSP00000295463	9606.ENSP00000308541	0	0	0	0	0	0	0	0.438	0.438
ALPI	SPP1	9606.ENSP00000295463	9606.ENSP00000378517	0	0	0	0	0	0	0	0.451	0.451
ALPI	APOA4	9606.ENSP00000295463	9606.ENSP00000350425	0	0	0	0	0.437	0	0	0.074	0.457
ALPI	PAX7	9606.ENSP00000295463	9606.ENSP00000364524	0	0	0	0	0	0	0	0.46	0.46
ALPI	ENTPD8	9606.ENSP00000295463	9606.ENSP00000360561	0	0	0	0	0.167	0	0	0.654	0.699
ALPI	GPIHBP1	9606.ENSP00000295463	9606.ENSP00000480053	0	0	0	0	0	0	0.9	0	0.9
ALPI	LY6D	9606.ENSP00000295463	9606.ENSP00000301263	0	0	0	0	0	0	0.9	0	0.9
ALPI	TEX101	9606.ENSP00000295463	9606.ENSP00000472308	0	0	0	0	0	0	0.9	0	0.9
ALPI	RAET1L	9606.ENSP00000295463	9606.ENSP00000356310	0	0	0	0	0	0	0.9	0	0.9
ALPI	LYPD1	9606.ENSP00000295463	9606.ENSP00000380605	0	0	0	0	0	0	0.9	0	0.9
ALPI	LYPD8	9606.ENSP00000295463	9606.ENSP00000466070	0	0	0	0	0.113	0	0.9	0	0.907
ALX3	SUN3	9606.ENSP00000358807	9606.ENSP00000297325	0	0	0	0	0.509	0.05	0	0	0.513
ALX3	NPTX1	9606.ENSP00000358807	9606.ENSP00000307549	0	0	0	0	0	0	0	0.468	0.468
AMBP	BPIFB2	9606.ENSP00000265132	9606.ENSP00000170150	0	0	0	0	0.431	0	0	0	0.431
AMBP	PDIA2	9606.ENSP00000265132	9606.ENSP00000219406	0	0	0	0	0.088	0	0	0.414	0.443
AMBP	APOC3	9606.ENSP00000265132	9606.ENSP00000227667	0	0	0	0	0.873	0	0	0.213	0.896
AMBP	HRG	9606.ENSP00000265132	9606.ENSP00000232003	0	0	0	0	0.492	0	0	0.292	0.624
AMBP	PROC	9606.ENSP00000265132	9606.ENSP00000234071	0	0	0	0	0.347	0.132	0	0.047	0.412
AMBP	NTS	9606.ENSP00000265132	9606.ENSP00000256010	0	0	0	0	0.523	0	0	0	0.523
AMBP	CP	9606.ENSP00000265132	9606.ENSP00000264613	0	0	0	0	0.306	0	0	0.348	0.528
AMBP	FETUB	9606.ENSP00000265132	9606.ENSP00000265029	0	0	0	0	0.845	0	0	0.364	0.897
AMBP	MAGEA3	9606.ENSP00000265132	9606.ENSP00000473093	0	0	0	0	0.152	0	0	0.354	0.428
AMBP	SPP1	9606.ENSP00000265132	9606.ENSP00000378517	0	0	0	0	0.076	0	0	0.426	0.446
AMBP	APOA4	9606.ENSP00000265132	9606.ENSP00000350425	0	0	0	0	0.185	0	0	0.393	0.484
AMBP	PAEP	9606.ENSP00000265132	9606.ENSP00000417898	0	0	0	0	0.058	0	0	0.54	0.548
AMBP	UGT2B10	9606.ENSP00000265132	9606.ENSP00000265403	0	0	0	0	0.55	0	0	0.049	0.554
AMBP	TM4SF5	9606.ENSP00000265132	9606.ENSP00000270560	0	0	0	0	0.562	0	0	0	0.562
AMBP	PAH	9606.ENSP00000265132	9606.ENSP00000448059	0	0	0	0	0.569	0	0	0	0.569
AMBP	SERPINA4	9606.ENSP00000265132	9606.ENSP00000450838	0	0	0	0	0.506	0	0	0.176	0.576
AMBP	SERPINA7	9606.ENSP00000265132	9606.ENSP00000329374	0	0	0	0	0.579	0	0	0.16	0.631
AMBP	PRSS1	9606.ENSP00000265132	9606.ENSP00000308720	0	0	0	0	0.152	0.562	0	0.138	0.652
AMBP	PRSS3P2	9606.ENSP00000265132	9606.ENSP00000485444	0	0	0	0	0.074	0.562	0	0.311	0.696
AMBP	IGFBP1	9606.ENSP00000265132	9606.ENSP00000275525	0	0	0	0	0.682	0	0	0.177	0.727
AMBP	FGL1	9606.ENSP00000265132	9606.ENSP00000381133	0	0	0	0	0.684	0	0	0.204	0.738
AMBP	GC	9606.ENSP00000265132	9606.ENSP00000421725	0	0	0	0	0.544	0	0	0.471	0.749
AMBP	PRSS3	9606.ENSP00000265132	9606.ENSP00000354280	0	0	0	0	0	0.732	0	0.186	0.772
AMBP	TF	9606.ENSP00000265132	9606.ENSP00000385834	0	0	0	0	0.749	0	0	0.312	0.82
AMBP	APOA2	9606.ENSP00000265132	9606.ENSP00000356969	0	0	0	0	0.85	0	0	0.202	0.875
AMBP	FGB	9606.ENSP00000265132	9606.ENSP00000306099	0	0	0	0	0.924	0	0	0.297	0.944
AMBP	FGA	9606.ENSP00000265132	9606.ENSP00000306361	0	0	0	0	0.943	0	0	0.32	0.96
AMBP	F2	9606.ENSP00000265132	9606.ENSP00000308541	0	0	0	0	0.91	0.437	0	0.423	0.968
ANGPT4	REG3A	9606.ENSP00000371347	9606.ENSP00000377456	0	0	0	0	0	0.157	0	0.328	0.409
ANGPTL3	SPP2	9606.ENSP00000360170	9606.ENSP00000168148	0	0	0	0	0.65	0	0	0.05	0.653
ANGPTL3	APOC3	9606.ENSP00000360170	9606.ENSP00000227667	0	0	0	0	0.173	0	0	0.67	0.716
ANGPTL3	HRG	9606.ENSP00000360170	9606.ENSP00000232003	0	0	0	0	0.604	0	0	0.05	0.608
ANGPTL3	FETUB	9606.ENSP00000360170	9606.ENSP00000265029	0	0	0	0	0.531	0	0	0.12	0.57
ANGPTL3	CILP2	9606.ENSP00000360170	9606.ENSP00000291495	0	0	0	0	0	0	0	0.631	0.631
ANGPTL3	TM4SF4	9606.ENSP00000360170	9606.ENSP00000305852	0	0	0	0	0.537	0	0	0	0.537
ANGPTL3	FGA	9606.ENSP00000360170	9606.ENSP00000306361	0	0	0	0.69	0.581	0	0	0.116	0.592
ANGPTL3	APOA4	9606.ENSP00000360170	9606.ENSP00000350425	0	0	0	0	0.301	0	0	0.329	0.51
ANGPTL3	SMOC1	9606.ENSP00000360170	9606.ENSP00000355110	0	0	0	0	0	0	0	0.64	0.64
ANGPTL3	F13B	9606.ENSP00000360170	9606.ENSP00000356382	0	0	0	0	0.421	0	0	0.058	0.432
ANGPTL3	PAH	9606.ENSP00000360170	9606.ENSP00000448059	0	0	0	0	0.645	0	0	0.071	0.656
ANGPTL3	INS	9606.ENSP00000360170	9606.ENSP00000380432	0	0	0	0	0	0	0	0.671	0.671
ANGPTL3	GC	9606.ENSP00000360170	9606.ENSP00000421725	0	0	0	0	0.686	0	0	0.237	0.751
ANGPTL3	GPIHBP1	9606.ENSP00000360170	9606.ENSP00000480053	0	0	0	0	0.062	0	0.9	0.669	0.966
ANGPTL7	MYOC	9606.ENSP00000366015	9606.ENSP00000037502	0	0	0	0	0.111	0	0	0.563	0.596
ANGPTL7	GPIHBP1	9606.ENSP00000366015	9606.ENSP00000480053	0	0	0	0	0.069	0	0	0.407	0.424
ANKRD1	MMP13	9606.ENSP00000360762	9606.ENSP00000260302	0	0	0	0	0	0	0	0.495	0.495
ANKRD1	NKX2-5	9606.ENSP00000360762	9606.ENSP00000327758	0	0	0	0	0.09	0.05	0	0.389	0.425
ANKRD1	MYPN	9606.ENSP00000360762	9606.ENSP00000351790	0	0	0	0	0.129	0.313	0	0.802	0.871
ANKRD1	MYH6	9606.ENSP00000360762	9606.ENSP00000386041	0	0	0	0	0.1	0.104	0	0.511	0.571
ANKRD34B	PSG11	9606.ENSP00000339802	9606.ENSP00000319140	0	0	0	0	0	0	0	0.424	0.424
ANKS4B	USH1C	9606.ENSP00000308772	9606.ENSP00000005226	0	0	0	0	0	0.564	0	0.852	0.933
ANKS4B	EPHA8	9606.ENSP00000308772	9606.ENSP00000166244	0	0	0	0	0	0.125	0	0.6	0.635
ANKS4B	CDHR5	9606.ENSP00000308772	9606.ENSP00000351118	0	0	0	0	0.107	0.057	0	0.644	0.674
ANKS4B	CDHR2	9606.ENSP00000308772	9606.ENSP00000424565	0	0	0	0	0.081	0.057	0	0.67	0.689
ANLN	DLGAP5	9606.ENSP00000265748	9606.ENSP00000247191	0	0	0	0	0.909	0	0	0.266	0.93
ANLN	TROAP	9606.ENSP00000265748	9606.ENSP00000257909	0	0	0	0	0.344	0	0	0.139	0.411
ANLN	NEIL3	9606.ENSP00000265748	9606.ENSP00000264596	0	0	0	0	0.548	0	0	0	0.548
ANLN	DEPDC1B	9606.ENSP00000265748	9606.ENSP00000265036	0	0	0	0	0.469	0	0	0	0.469
ANLN	GNG4	9606.ENSP00000265748	9606.ENSP00000375727	0	0	0	0	0	0	0	0.44	0.44
ANLN	MCM10	9606.ENSP00000265748	9606.ENSP00000418268	0	0	0	0	0.582	0	0	0.108	0.612
ANLN	CDC25C	9606.ENSP00000265748	9606.ENSP00000321656	0	0	0	0	0.702	0	0	0.146	0.735
ANLN	BIRC5	9606.ENSP00000265748	9606.ENSP00000301633	0	0	0	0	0.692	0	0	0.307	0.777
ANLN	HJURP	9606.ENSP00000265748	9606.ENSP00000414109	0	0	0	0	0.777	0	0	0.061	0.782
ANLN	DEPDC1	9606.ENSP00000265748	9606.ENSP00000412292	0	0	0	0	0.79	0	0	0.09	0.801
ANLN	NEK2	9606.ENSP00000265748	9606.ENSP00000355966	0	0	0	0	0.74	0	0	0.287	0.807
ANLN	EXO1	9606.ENSP00000265748	9606.ENSP00000355506	0	0	0	0	0.79	0	0	0.17	0.819
ANLN	AURKB	9606.ENSP00000265748	9606.ENSP00000313950	0	0	0	0	0.615	0	0	0.563	0.825
ANLN	CENPA	9606.ENSP00000265748	9606.ENSP00000336868	0	0	0	0	0.779	0	0	0.25	0.827
ANLN	NUF2	9606.ENSP00000265748	9606.ENSP00000271452	0	0	0	0	0.748	0	0	0.399	0.842
ANLN	UBE2C	9606.ENSP00000265748	9606.ENSP00000348838	0	0	0	0	0.793	0	0	0.348	0.859
ANLN	CDC20	9606.ENSP00000265748	9606.ENSP00000361540	0	0	0	0	0.792	0	0	0.358	0.86
ANLN	MELK	9606.ENSP00000265748	9606.ENSP00000298048	0	0	0	0	0.831	0	0	0.314	0.879
ANLN	TOP2A	9606.ENSP00000265748	9606.ENSP00000411532	0	0	0	0	0.834	0	0	0.326	0.883
ANLN	ASPM	9606.ENSP00000265748	9606.ENSP00000356379	0	0	0	0	0.869	0.082	0	0.173	0.892
ANLN	KIF14	9606.ENSP00000265748	9606.ENSP00000356319	0	0	0	0	0.76	0.08	0	0.549	0.892
ANLN	KIF2C	9606.ENSP00000265748	9606.ENSP00000361298	0	0	0	0	0.786	0.08	0	0.496	0.892
ANLN	CENPF	9606.ENSP00000265748	9606.ENSP00000355922	0	0	0	0	0.806	0	0	0.492	0.897
ANLN	TPX2	9606.ENSP00000265748	9606.ENSP00000300403	0	0	0	0	0.839	0	0	0.455	0.908
ANLN	KIF4A	9606.ENSP00000265748	9606.ENSP00000363524	0	0	0	0	0.797	0.08	0	0.569	0.912
ANXA10	TRIM72	9606.ENSP00000352248	9606.ENSP00000312675	0	0	0	0	0.064	0	0	0.56	0.57
AOC1	OLFM4	9606.ENSP00000411613	9606.ENSP00000219022	0	0	0	0	0.088	0	0.9	0	0.904
AOC1	TCN1	9606.ENSP00000411613	9606.ENSP00000257264	0	0	0	0	0	0	0.9	0	0.9
AOC1	LCT	9606.ENSP00000411613	9606.ENSP00000264162	0	0	0	0	0	0	0	0.441	0.441
AOC1	CP	9606.ENSP00000411613	9606.ENSP00000264613	0	0	0	0	0	0	0	0.524	0.524
AOC1	SH3GL3	9606.ENSP00000411613	9606.ENSP00000320092	0	0	0	0	0	0	0	0.451	0.451
AOC1	CALCA	9606.ENSP00000411613	9606.ENSP00000331746	0	0	0	0	0	0	0	0.62	0.62
AOC1	HJURP	9606.ENSP00000411613	9606.ENSP00000414109	0	0	0	0	0	0	0	0.446	0.446
APCS	HRG	9606.ENSP00000255040	9606.ENSP00000232003	0	0	0	0	0.303	0	0	0.389	0.556
APCS	IAPP	9606.ENSP00000255040	9606.ENSP00000240652	0	0	0	0	0	0	0.9	0.35	0.932
APCS	CRP	9606.ENSP00000255040	9606.ENSP00000255030	0	0	0	0.942	0.545	0.379	0	0.714	0.717
APCS	CPN1	9606.ENSP00000255040	9606.ENSP00000359446	0	0	0	0	0.123	0	0	0.372	0.426
APCS	APOA2	9606.ENSP00000255040	9606.ENSP00000356969	0	0	0	0	0.14	0	0	0.36	0.426
APCS	SERPINA4	9606.ENSP00000255040	9606.ENSP00000450838	0	0	0	0	0.267	0	0	0.255	0.431
APCS	FGB	9606.ENSP00000255040	9606.ENSP00000306099	0	0	0	0	0.251	0	0	0.383	0.518
APCS	GC	9606.ENSP00000255040	9606.ENSP00000421725	0	0	0	0	0.328	0	0	0.358	0.55
APCS	CALCA	9606.ENSP00000255040	9606.ENSP00000331746	0	0	0	0	0	0	0.9	0.064	0.902
APCS	INS	9606.ENSP00000255040	9606.ENSP00000380432	0	0	0	0	0	0	0.9	0.295	0.926
APCS	APOA4	9606.ENSP00000255040	9606.ENSP00000350425	0	0	0	0	0.109	0	0.9	0.442	0.945
APCS	FGA	9606.ENSP00000255040	9606.ENSP00000306361	0	0	0	0	0.242	0	0.9	0.343	0.945
APOA2	SPP2	9606.ENSP00000356969	9606.ENSP00000168148	0	0	0	0	0.143	0	0.9	0.052	0.911
APOA2	BPIFB2	9606.ENSP00000356969	9606.ENSP00000170150	0	0	0	0	0.342	0	0.9	0	0.931
APOA2	APOC3	9606.ENSP00000356969	9606.ENSP00000227667	0	0	0	0	0.796	0	0.9	0.86	0.996
APOA2	HRG	9606.ENSP00000356969	9606.ENSP00000232003	0	0	0	0	0.212	0	0	0.349	0.465
APOA2	PROC	9606.ENSP00000356969	9606.ENSP00000234071	0	0	0	0	0.275	0	0.9	0.062	0.926
APOA2	VGF	9606.ENSP00000356969	9606.ENSP00000249330	0	0	0	0	0	0	0.9	0.111	0.907
APOA2	CRP	9606.ENSP00000356969	9606.ENSP00000255030	0	0	0	0	0.106	0	0	0.447	0.484
APOA2	NTS	9606.ENSP00000356969	9606.ENSP00000256010	0	0	0	0	0.534	0	0	0.097	0.561
APOA2	CP	9606.ENSP00000356969	9606.ENSP00000264613	0	0	0	0	0.115	0	0.9	0.44	0.946
APOA2	UGT2B10	9606.ENSP00000356969	9606.ENSP00000265403	0	0	0	0	0.404	0	0	0	0.404
APOA2	IGFBP1	9606.ENSP00000356969	9606.ENSP00000275525	0	0	0	0	0.645	0	0.9	0.101	0.965
APOA2	ATOH1	9606.ENSP00000356969	9606.ENSP00000302216	0	0	0	0	0	0	0	0.416	0.416
APOA2	FGB	9606.ENSP00000356969	9606.ENSP00000306099	0	0	0	0	0.491	0	0	0.307	0.632
APOA2	FGA	9606.ENSP00000356969	9606.ENSP00000306361	0	0	0	0	0.628	0	0.9	0.329	0.972
APOA2	F2	9606.ENSP00000356969	9606.ENSP00000308541	0	0	0	0	0.794	0	0	0.246	0.838
APOA2	SERPINA7	9606.ENSP00000356969	9606.ENSP00000329374	0	0	0	0	0.541	0	0	0.26	0.646
APOA2	APOA4	9606.ENSP00000356969	9606.ENSP00000350425	0	0	0	0	0.115	0	0.9	0.626	0.964
APOA2	SERPINA4	9606.ENSP00000356969	9606.ENSP00000450838	0	0	0	0	0.328	0	0	0.198	0.438
APOA2	INS	9606.ENSP00000356969	9606.ENSP00000380432	0	0	0	0	0	0	0	0.512	0.512
APOA2	GC	9606.ENSP00000356969	9606.ENSP00000421725	0	0	0	0	0.205	0	0	0.44	0.536
APOA2	FGL1	9606.ENSP00000356969	9606.ENSP00000381133	0	0	0	0	0.546	0	0	0.146	0.596
APOA2	GPIHBP1	9606.ENSP00000356969	9606.ENSP00000480053	0	0	0	0	0.062	0	0.9	0.074	0.905
APOA2	CHGB	9606.ENSP00000356969	9606.ENSP00000368244	0	0	0	0	0	0	0.9	0.099	0.906
APOA2	SPP1	9606.ENSP00000356969	9606.ENSP00000378517	0	0	0	0	0	0	0.9	0.1	0.906
APOA2	TF	9606.ENSP00000356969	9606.ENSP00000385834	0	0	0	0	0.675	0	0.9	0.502	0.982
APOA4	SPP2	9606.ENSP00000350425	9606.ENSP00000168148	0	0	0	0	0.567	0	0	0	0.567
APOA4	APOC3	9606.ENSP00000350425	9606.ENSP00000227667	0	0	0	0	0.565	0	0.9	0.789	0.99
APOA4	HRG	9606.ENSP00000350425	9606.ENSP00000232003	0	0	0	0	0.57	0	0	0.356	0.711
APOA4	UGT2A3	9606.ENSP00000350425	9606.ENSP00000251566	0	0	0	0	0.404	0	0	0	0.404
APOA4	G6PC	9606.ENSP00000350425	9606.ENSP00000253801	0	0	0	0	0.149	0.379	0	0.203	0.542
APOA4	CP	9606.ENSP00000350425	9606.ENSP00000264613	0	0	0	0	0.098	0	0	0.398	0.433
APOA4	FETUB	9606.ENSP00000350425	9606.ENSP00000265029	0	0	0	0	0.688	0	0	0.29	0.769
APOA4	HGD	9606.ENSP00000350425	9606.ENSP00000283871	0	0	0	0	0.592	0	0	0	0.592
APOA4	TM4SF4	9606.ENSP00000350425	9606.ENSP00000305852	0	0	0	0	0.669	0	0	0	0.669
APOA4	FGB	9606.ENSP00000350425	9606.ENSP00000306099	0	0	0	0	0.72	0	0	0.403	0.826
APOA4	FGA	9606.ENSP00000350425	9606.ENSP00000306361	0	0	0	0	0.698	0	0	0.409	0.814
APOA4	SLC2A2	9606.ENSP00000350425	9606.ENSP00000323568	0	0	0	0	0.584	0	0	0.212	0.658
APOA4	SERPINA7	9606.ENSP00000350425	9606.ENSP00000329374	0	0	0	0	0.285	0	0	0.2	0.404
APOA4	DEFA5	9606.ENSP00000350425	9606.ENSP00000329890	0	0	0	0	0.391	0	0	0.108	0.433
APOA4	INS	9606.ENSP00000350425	9606.ENSP00000380432	0	0	0	0	0.048	0	0	0.443	0.447
APOA4	FABP7	9606.ENSP00000350425	9606.ENSP00000357429	0	0	0	0	0.062	0	0	0.467	0.479
APOA4	TF	9606.ENSP00000350425	9606.ENSP00000385834	0	0	0	0	0.094	0	0	0.492	0.52
APOA4	PAH	9606.ENSP00000350425	9606.ENSP00000448059	0	0	0	0	0.57	0	0	0.106	0.6
APOA4	F13B	9606.ENSP00000350425	9606.ENSP00000356382	0	0	0	0	0.553	0	0	0.244	0.647
APOA4	GC	9606.ENSP00000350425	9606.ENSP00000421725	0	0	0	0	0.648	0	0	0.599	0.853
APOA4	GPIHBP1	9606.ENSP00000350425	9606.ENSP00000480053	0	0	0	0	0.063	0	0.9	0.232	0.921
APOBEC1	INS	9606.ENSP00000229304	9606.ENSP00000380432	0	0	0	0	0	0	0	0.454	0.454
APOBEC1	DEFA5	9606.ENSP00000229304	9606.ENSP00000329890	0	0	0	0	0.497	0	0	0.075	0.514
APOBEC1	PHGR1	9606.ENSP00000229304	9606.ENSP00000410024	0	0	0	0	0.522	0	0	0	0.522
APOC3	OTC	9606.ENSP00000227667	9606.ENSP00000039007	0	0	0	0	0.351	0	0	0.157	0.43
APOC3	BPIFB2	9606.ENSP00000227667	9606.ENSP00000170150	0	0	0	0	0.214	0	0	0.45	0.549
APOC3	PNPLA5	9606.ENSP00000227667	9606.ENSP00000216177	0	0	0	0	0.062	0	0	0.705	0.712
APOC3	PRODH2	9606.ENSP00000227667	9606.ENSP00000301175	0	0	0	0	0.402	0	0	0	0.402
APOC3	HRG	9606.ENSP00000227667	9606.ENSP00000232003	0	0	0	0	0.247	0	0	0.24	0.404
APOC3	SERPINA4	9606.ENSP00000227667	9606.ENSP00000450838	0	0	0	0	0.364	0	0	0.138	0.429
APOC3	UGT2A3	9606.ENSP00000227667	9606.ENSP00000251566	0	0	0	0	0.437	0	0	0	0.437
APOC3	GC	9606.ENSP00000227667	9606.ENSP00000421725	0	0	0	0	0.245	0	0	0.293	0.443
APOC3	NPC1L1	9606.ENSP00000227667	9606.ENSP00000289547	0	0	0	0	0.077	0	0	0.446	0.466
APOC3	TF	9606.ENSP00000227667	9606.ENSP00000385834	0	0	0	0	0.325	0	0	0.298	0.506
APOC3	G6PC	9606.ENSP00000227667	9606.ENSP00000253801	0	0	0	0	0.267	0	0	0.377	0.524
APOC3	FGL1	9606.ENSP00000227667	9606.ENSP00000381133	0	0	0	0	0.566	0	0	0.046	0.568
APOC3	CRP	9606.ENSP00000227667	9606.ENSP00000255030	0	0	0	0	0.185	0	0	0.53	0.601
APOC3	SLC2A2	9606.ENSP00000227667	9606.ENSP00000323568	0	0	0	0	0.515	0	0	0.213	0.602
APOC3	TM4SF5	9606.ENSP00000227667	9606.ENSP00000270560	0	0	0	0	0.624	0	0	0	0.624
APOC3	IGFBP1	9606.ENSP00000227667	9606.ENSP00000275525	0	0	0	0	0.547	0	0	0.216	0.629
APOC3	SERPINA7	9606.ENSP00000227667	9606.ENSP00000329374	0	0	0	0	0.621	0	0	0.198	0.683
APOC3	FGB	9606.ENSP00000227667	9606.ENSP00000306099	0	0	0	0	0.573	0	0	0.388	0.727
APOC3	FGA	9606.ENSP00000227667	9606.ENSP00000306361	0	0	0	0	0.624	0	0	0.401	0.765
APOC3	F2	9606.ENSP00000227667	9606.ENSP00000308541	0	0	0	0	0.787	0	0	0.236	0.83
APOC3	INS	9606.ENSP00000227667	9606.ENSP00000380432	0	0	0	0	0	0	0	0.861	0.861
APOC3	GPIHBP1	9606.ENSP00000227667	9606.ENSP00000480053	0	0	0	0	0.063	0	0.9	0.628	0.962
ARHGAP36	RHOV	9606.ENSP00000276211	9606.ENSP00000220507	0	0	0	0	0	0.265	0.9	0.183	0.934
ARHGAP36	C16orf59	9606.ENSP00000276211	9606.ENSP00000355022	0	0	0	0	0	0	0	0.476	0.476
ARHGAP40	RHOV	9606.ENSP00000362442	9606.ENSP00000220507	0	0	0	0	0.076	0.088	0.9	0	0.908
ARL14	WFDC3	9606.ENSP00000323847	9606.ENSP00000243938	0	0	0	0	0	0	0	0.412	0.412
ARL14	FREM3	9606.ENSP00000323847	9606.ENSP00000332886	0	0	0	0	0	0	0	0.408	0.408
ARSH	CYP2B6	9606.ENSP00000370522	9606.ENSP00000324648	0	0	0	0	0.049	0	0	0.398	0.403
ARSH	SOX3	9606.ENSP00000370522	9606.ENSP00000359567	0	0	0	0	0	0	0	0.55	0.55
ASCL1	DLL3	9606.ENSP00000266744	9606.ENSP00000205143	0	0	0	0	0.065	0	0	0.498	0.51
ASCL1	PHOX2B	9606.ENSP00000266744	9606.ENSP00000226382	0	0	0	0	0	0	0	0.803	0.803
ASCL1	ISL1	9606.ENSP00000266744	9606.ENSP00000230658	0	0	0	0	0.061	0.123	0	0.579	0.623
ASCL1	NEUROD4	9606.ENSP00000266744	9606.ENSP00000242994	0	0	0	0	0.106	0.064	0	0.621	0.655
ASCL1	CALB1	9606.ENSP00000266744	9606.ENSP00000265431	0	0	0	0	0.051	0	0	0.49	0.495
ASCL1	RAX	9606.ENSP00000266744	9606.ENSP00000334813	0	0	0	0	0.049	0.123	0	0.338	0.4
ASCL1	PAX7	9606.ENSP00000266744	9606.ENSP00000364524	0	0	0	0	0.069	0	0	0.386	0.403
ASCL1	INS	9606.ENSP00000266744	9606.ENSP00000380432	0	0	0	0	0.051	0	0	0.399	0.405
ASCL1	NPY	9606.ENSP00000266744	9606.ENSP00000384364	0	0	0	0	0.087	0	0	0.377	0.406
ASCL1	NEUROD1	9606.ENSP00000266744	9606.ENSP00000295108	0	0	0	0.607	0.139	0.064	0	0.797	0.42
ASCL1	WNT3A	9606.ENSP00000266744	9606.ENSP00000284523	0	0	0	0	0	0.079	0	0.399	0.423
ASCL1	OLIG3	9606.ENSP00000266744	9606.ENSP00000356708	0	0	0	0	0.061	0.064	0	0.404	0.431
ASCL1	SOX3	9606.ENSP00000266744	9606.ENSP00000359567	0	0	0	0	0.088	0.057	0	0.429	0.466
ASCL1	LHX8	9606.ENSP00000266744	9606.ENSP00000294638	0	0	0	0	0	0.123	0	0.428	0.476
ASCL1	EMX2	9606.ENSP00000266744	9606.ENSP00000450962	0	0	0	0	0.057	0.05	0	0.481	0.494
ASCL1	SOX11	9606.ENSP00000266744	9606.ENSP00000322568	0	0	0	0	0	0.057	0	0.495	0.504
ASCL1	LHX1	9606.ENSP00000266744	9606.ENSP00000477829	0	0	0	0	0.051	0.123	0	0.454	0.506
ASCL1	NR2E1	9606.ENSP00000266744	9606.ENSP00000357979	0	0	0	0	0.099	0.078	0	0.474	0.525
ASCL1	ZIC1	9606.ENSP00000266744	9606.ENSP00000282928	0	0	0	0	0.158	0.053	0	0.479	0.548
ASCL1	POU4F1	9606.ENSP00000266744	9606.ENSP00000366413	0	0	0	0	0.055	0.05	0	0.539	0.549
ASCL1	ENSG00000258947	9606.ENSP00000266744	9606.ENSP00000320295	0	0	0	0	0.062	0	0	0.547	0.557
ASCL1	OTX2	9606.ENSP00000266744	9606.ENSP00000343819	0	0	0	0	0.061	0	0	0.557	0.566
ASCL1	PRDM13	9606.ENSP00000266744	9606.ENSP00000358217	0	0	0	0	0	0.053	0	0.578	0.583
ASCL1	LIN28A	9606.ENSP00000266744	9606.ENSP00000363314	0	0	0	0	0	0	0	0.583	0.583
ASCL1	GAD1	9606.ENSP00000266744	9606.ENSP00000350928	0	0	0	0	0.101	0	0	0.555	0.583
ASCL1	FABP7	9606.ENSP00000266744	9606.ENSP00000357429	0	0	0	0	0.105	0	0	0.559	0.589
ASCL1	LHX2	9606.ENSP00000266744	9606.ENSP00000362717	0	0	0	0	0.098	0.123	0	0.562	0.623
ASCL1	MYCN	9606.ENSP00000266744	9606.ENSP00000281043	0	0	0	0	0	0	0	0.625	0.625
ASCL1	SOX1	9606.ENSP00000266744	9606.ENSP00000330218	0	0	0	0	0.161	0.057	0	0.568	0.628
ASCL1	NKX2-2	9606.ENSP00000266744	9606.ENSP00000366347	0	0	0	0	0.107	0.086	0	0.709	0.742
ASCL1	POU3F3	9606.ENSP00000266744	9606.ENSP00000355001	0	0	0	0	0.161	0.05	0	0.717	0.755
ASCL1	ATOH1	9606.ENSP00000266744	9606.ENSP00000302216	0	0	0	0	0.092	0.089	0	0.744	0.77
ASCL1	FOXG1	9606.ENSP00000266744	9606.ENSP00000339004	0	0	0	0	0.142	0.077	0	0.738	0.775
ASCL1	INSM1	9606.ENSP00000266744	9606.ENSP00000312631	0	0	0	0	0.132	0	0	0.767	0.789
ASCL1	PHOX2A	9606.ENSP00000266744	9606.ENSP00000298231	0	0	0	0	0	0	0	0.82	0.82
ASCL1	POU3F2	9606.ENSP00000266744	9606.ENSP00000329170	0	0	0	0	0.145	0.05	0	0.88	0.895
ASPM	MYBL2	9606.ENSP00000356379	9606.ENSP00000217026	0	0	0	0	0.523	0	0	0.085	0.545
ASPM	TNNC1	9606.ENSP00000356379	9606.ENSP00000232975	0	0	0	0	0	0.387	0	0.157	0.461
ASPM	DLGAP5	9606.ENSP00000356379	9606.ENSP00000247191	0	0	0	0	0.982	0	0	0.186	0.985
ASPM	TROAP	9606.ENSP00000356379	9606.ENSP00000257909	0	0	0	0	0.893	0	0	0	0.893
ASPM	NEIL3	9606.ENSP00000356379	9606.ENSP00000264596	0	0	0	0	0.599	0	0	0.188	0.66
ASPM	DEPDC1B	9606.ENSP00000356379	9606.ENSP00000265036	0	0	0	0	0.606	0	0	0.132	0.643
ASPM	CALB1	9606.ENSP00000356379	9606.ENSP00000265431	0	0	0	0	0	0.387	0	0.157	0.461
ASPM	NUF2	9606.ENSP00000356379	9606.ENSP00000271452	0	0	0	0	0.897	0	0	0.257	0.92
ASPM	MELK	9606.ENSP00000356379	9606.ENSP00000298048	0	0	0	0	0.923	0.064	0	0.346	0.949
ASPM	TPX2	9606.ENSP00000356379	9606.ENSP00000300403	0	0	0	0	0.966	0	0	0.096	0.968
ASPM	BIRC5	9606.ENSP00000356379	9606.ENSP00000301633	0	0	0	0	0.892	0	0	0.253	0.916
ASPM	AURKB	9606.ENSP00000356379	9606.ENSP00000313950	0	0	0	0	0.955	0.08	0	0.419	0.974
ASPM	CALML3	9606.ENSP00000356379	9606.ENSP00000315299	0	0	0	0	0	0.387	0	0.157	0.461
ASPM	CDC25C	9606.ENSP00000356379	9606.ENSP00000321656	0	0	0	0	0.707	0	0	0.066	0.715
ASPM	CENPA	9606.ENSP00000356379	9606.ENSP00000336868	0	0	0	0	0.83	0.05	0	0.126	0.847
ASPM	UBE2C	9606.ENSP00000356379	9606.ENSP00000348838	0	0	0	0	0.898	0.081	0	0.296	0.928
ASPM	IQGAP3	9606.ENSP00000356379	9606.ENSP00000354451	0	0	0	0.539	0.707	0.182	0	0.128	0.76
ASPM	EXO1	9606.ENSP00000356379	9606.ENSP00000355506	0	0	0	0	0.918	0.104	0	0.089	0.927
ASPM	CENPF	9606.ENSP00000356379	9606.ENSP00000355922	0	0	0	0	0.962	0	0	0.495	0.98
ASPM	NEK2	9606.ENSP00000356379	9606.ENSP00000355966	0	0	0	0	0.91	0.064	0	0.149	0.922
ASPM	KIF14	9606.ENSP00000356379	9606.ENSP00000356319	0	0	0	0	0.915	0.086	0	0.258	0.937
ASPM	CALML5	9606.ENSP00000356379	9606.ENSP00000369689	0	0	0	0	0	0.387	0	0.157	0.461
ASPM	MCM10	9606.ENSP00000356379	9606.ENSP00000418268	0	0	0	0	0.8	0	0	0	0.8
ASPM	KIF18B	9606.ENSP00000356379	9606.ENSP00000465992	0	0	0	0	0.771	0.086	0	0.288	0.838
ASPM	HJURP	9606.ENSP00000356379	9606.ENSP00000414109	0	0	0	0	0.893	0	0	0.163	0.906
ASPM	DEPDC1	9606.ENSP00000356379	9606.ENSP00000412292	0	0	0	0	0.9	0	0	0.292	0.926
ASPM	KIF2C	9606.ENSP00000356379	9606.ENSP00000361298	0	0	0	0	0.915	0.086	0	0.321	0.942
ASPM	KIF4A	9606.ENSP00000356379	9606.ENSP00000363524	0	0	0	0	0.945	0.086	0	0.458	0.97
ASPM	TOP2A	9606.ENSP00000356379	9606.ENSP00000411532	0	0	0	0	0.967	0	0	0.234	0.973
ASPM	CDC20	9606.ENSP00000356379	9606.ENSP00000361540	0	0	0	0	0.972	0.168	0	0.346	0.983
ATOH1	KRT20	9606.ENSP00000302216	9606.ENSP00000167588	0	0	0	0	0.299	0	0	0.299	0.488
ATOH1	OLFM4	9606.ENSP00000302216	9606.ENSP00000219022	0	0	0	0	0.088	0	0	0.54	0.562
ATOH1	PHOX2B	9606.ENSP00000302216	9606.ENSP00000226382	0	0	0	0	0.064	0	0	0.553	0.564
ATOH1	ISL1	9606.ENSP00000302216	9606.ENSP00000230658	0	0	0	0	0	0	0	0.476	0.476
ATOH1	LHX5	9606.ENSP00000302216	9606.ENSP00000261731	0	0	0	0	0.064	0	0	0.411	0.425
ATOH1	CALB1	9606.ENSP00000302216	9606.ENSP00000265431	0	0	0	0	0	0	0	0.442	0.442
ATOH1	MYCN	9606.ENSP00000302216	9606.ENSP00000281043	0	0	0	0	0	0	0	0.464	0.464
ATOH1	ZIC1	9606.ENSP00000302216	9606.ENSP00000282928	0	0	0	0	0.062	0.085	0	0.704	0.724
ATOH1	WNT3A	9606.ENSP00000302216	9606.ENSP00000284523	0	0	0	0	0	0.085	0	0.404	0.431
ATOH1	DEFA5	9606.ENSP00000302216	9606.ENSP00000329890	0	0	0	0	0.297	0	0	0.197	0.411
ATOH1	SPINK4	9606.ENSP00000302216	9606.ENSP00000369045	0	0	0	0	0.166	0	0	0.338	0.424
ATOH1	NKX2-2	9606.ENSP00000302216	9606.ENSP00000366347	0	0	0	0	0.063	0.08	0	0.416	0.452
ATOH1	FGF3	9606.ENSP00000302216	9606.ENSP00000334122	0	0	0	0	0	0	0	0.453	0.453
ATOH1	OTX2	9606.ENSP00000302216	9606.ENSP00000343819	0	0	0	0	0.061	0	0	0.441	0.453
ATOH1	LHX1	9606.ENSP00000302216	9606.ENSP00000477829	0	0	0	0	0.062	0	0	0.45	0.462
ATOH1	FOXG1	9606.ENSP00000302216	9606.ENSP00000339004	0	0	0	0	0.063	0	0	0.454	0.467
ATOH1	OTOG	9606.ENSP00000302216	9606.ENSP00000382323	0	0	0	0	0	0	0	0.469	0.469
ATOH1	LHX2	9606.ENSP00000302216	9606.ENSP00000362717	0	0	0	0	0	0	0	0.48	0.48
ATOH1	CDX2	9606.ENSP00000302216	9606.ENSP00000370408	0	0	0	0	0.213	0.085	0	0.425	0.55
ATOH1	POU4F1	9606.ENSP00000302216	9606.ENSP00000366413	0	0	0	0	0.063	0	0	0.73	0.737
ATOH1	MUC6	9606.ENSP00000302216	9606.ENSP00000406861	0	0	0	0	0	0	0	0.742	0.742
ATOH1	MUC5AC	9606.ENSP00000302216	9606.ENSP00000485659	0	0	0	0	0.061	0	0	0.784	0.789
ATP10B	VSX1	9606.ENSP00000313600	9606.ENSP00000365899	0	0	0	0	0	0	0	0.4	0.4
ATP4A	CRP	9606.ENSP00000262623	9606.ENSP00000255030	0	0	0	0	0	0	0	0.56	0.56
ATP4A	TFF2	9606.ENSP00000262623	9606.ENSP00000291526	0	0	0	0	0	0	0	0.416	0.416
ATP4A	CA9	9606.ENSP00000262623	9606.ENSP00000367608	0	0	0	0	0	0.11	0	0.373	0.418
ATP4A	TNFSF11	9606.ENSP00000262623	9606.ENSP00000381775	0	0	0	0	0	0	0	0.422	0.422
ATP4A	GCG	9606.ENSP00000262623	9606.ENSP00000387662	0	0	0	0	0	0	0	0.427	0.426
ATP4A	LCT	9606.ENSP00000262623	9606.ENSP00000264162	0	0	0	0	0.063	0.131	0	0.375	0.446
ATP4A	CALCA	9606.ENSP00000262623	9606.ENSP00000331746	0	0	0	0	0	0	0	0.474	0.474
ATP4A	CTCFL	9606.ENSP00000262623	9606.ENSP00000415579	0	0	0	0	0.05	0.05	0	0.469	0.478
ATP4A	MUC5AC	9606.ENSP00000262623	9606.ENSP00000485659	0	0	0	0	0.061	0	0	0.483	0.494
ATP4A	HTR3A	9606.ENSP00000262623	9606.ENSP00000347754	0	0	0	0	0.061	0.093	0	0.471	0.51
ATP4A	CYP1A2	9606.ENSP00000262623	9606.ENSP00000342007	0	0	0	0	0	0.05	0	0.51	0.514
ATP4A	CYP2B6	9606.ENSP00000262623	9606.ENSP00000324648	0	0	0	0	0	0.05	0	0.519	0.523
ATP4A	F2	9606.ENSP00000262623	9606.ENSP00000308541	0	0	0	0	0	0.123	0	0.52	0.561
ATP4A	RS1	9606.ENSP00000262623	9606.ENSP00000369320	0	0	0	0	0.061	0.553	0	0	0.562
ATP4A	INS	9606.ENSP00000262623	9606.ENSP00000380432	0	0	0	0	0	0	0	0.58	0.58
ATP4A	SST	9606.ENSP00000262623	9606.ENSP00000287641	0	0	0	0	0.087	0	0	0.644	0.661
ATP4A	GAST	9606.ENSP00000262623	9606.ENSP00000331358	0	0	0	0	0	0	0	0.86	0.86
AURKB	MYBL2	9606.ENSP00000313950	9606.ENSP00000217026	0	0	0	0	0.591	0	0	0.387	0.738
AURKB	DLGAP5	9606.ENSP00000313950	9606.ENSP00000247191	0	0	0	0	0.947	0	0	0.524	0.973
AURKB	TROAP	9606.ENSP00000313950	9606.ENSP00000257909	0	0	0	0	0.915	0	0	0.145	0.925
AURKB	NEIL3	9606.ENSP00000313950	9606.ENSP00000264596	0	0	0	0	0.473	0	0	0.087	0.499
AURKB	DEPDC1B	9606.ENSP00000313950	9606.ENSP00000265036	0	0	0	0	0.451	0	0	0.073	0.469
AURKB	NUF2	9606.ENSP00000313950	9606.ENSP00000271452	0	0	0	0	0.838	0.328	0.9	0.74	0.996
AURKB	MYCN	9606.ENSP00000313950	9606.ENSP00000281043	0	0	0	0	0.061	0.191	0	0.618	0.685
AURKB	MELK	9606.ENSP00000313950	9606.ENSP00000298048	0	0	0	0.742	0.872	0	0	0.502	0.887
AURKB	TPX2	9606.ENSP00000313950	9606.ENSP00000300403	0	0	0	0	0.897	0.435	0	0.779	0.986
AURKB	BIRC5	9606.ENSP00000313950	9606.ENSP00000301633	0	0	0	0	0.874	0.588	0.9	0.701	0.998
AURKB	FABP7	9606.ENSP00000313950	9606.ENSP00000357429	0	0	0	0	0	0	0	0.428	0.428
AURKB	CDKN2A	9606.ENSP00000313950	9606.ENSP00000418915	0	0	0	0	0.063	0.143	0	0.384	0.462
AURKB	IQGAP3	9606.ENSP00000313950	9606.ENSP00000354451	0	0	0	0	0.465	0	0	0.053	0.471
AURKB	PLK5	9606.ENSP00000313950	9606.ENSP00000466248	0	0	0	0	0.196	0.342	0	0.398	0.654
AURKB	DEPDC1	9606.ENSP00000313950	9606.ENSP00000412292	0	0	0	0	0.683	0	0	0.24	0.749
AURKB	EXO1	9606.ENSP00000313950	9606.ENSP00000355506	0	0	0	0	0.723	0	0	0.232	0.779
AURKB	MCM10	9606.ENSP00000313950	9606.ENSP00000418268	0	0	0	0	0.769	0	0	0.284	0.827
AURKB	KIF14	9606.ENSP00000313950	9606.ENSP00000356319	0	0	0	0	0.795	0.125	0	0.322	0.868
AURKB	KIF18B	9606.ENSP00000313950	9606.ENSP00000465992	0	0	0	0	0.784	0.186	0	0.427	0.89
AURKB	HJURP	9606.ENSP00000313950	9606.ENSP00000414109	0	0	0	0	0.885	0	0	0.324	0.919
AURKB	CDC25C	9606.ENSP00000313950	9606.ENSP00000321656	0	0	0	0	0.725	0	0	0.733	0.923
AURKB	NEK2	9606.ENSP00000313950	9606.ENSP00000355966	0	0	0.388	0.695	0.895	0	0	0.676	0.926
AURKB	TOP2A	9606.ENSP00000313950	9606.ENSP00000411532	0	0	0	0	0.941	0.261	0	0.565	0.979
AURKB	KIF4A	9606.ENSP00000313950	9606.ENSP00000363524	0	0	0	0	0.889	0.125	0	0.823	0.981
AURKB	CENPF	9606.ENSP00000313950	9606.ENSP00000355922	0	0	0	0	0.803	0	0.9	0.606	0.991
AURKB	UBE2C	9606.ENSP00000313950	9606.ENSP00000348838	0	0	0	0	0.934	0.064	0.9	0.597	0.997
AURKB	CENPA	9606.ENSP00000313950	9606.ENSP00000336868	0	0	0	0	0.807	0.542	0.9	0.842	0.998
AURKB	CDC20	9606.ENSP00000313950	9606.ENSP00000361540	0	0	0	0	0.972	0.379	0.9	0.791	0.999
AURKB	KIF2C	9606.ENSP00000313950	9606.ENSP00000361298	0	0	0	0	0.913	0.125	0.9	0.915	0.999
B3GNT3	SLC5A5	9606.ENSP00000321874	9606.ENSP00000222248	0	0	0	0	0.058	0	0	0.419	0.429
B3GNT3	FUT9	9606.ENSP00000321874	9606.ENSP00000302599	0	0	0	0	0.061	0	0.9	0.077	0.905
B3GNT3	MUC17	9606.ENSP00000321874	9606.ENSP00000302716	0	0	0	0	0.076	0	0.9	0.251	0.924
B3GNT3	FUT6	9606.ENSP00000321874	9606.ENSP00000313398	0	0	0	0	0.095	0	0.9	0.425	0.943
B3GNT3	HS6ST2	9606.ENSP00000321874	9606.ENSP00000429473	0	0	0	0	0	0	0	0.509	0.509
B3GNT3	MUC21	9606.ENSP00000321874	9606.ENSP00000365473	0	0	0	0	0	0	0.9	0	0.9
B3GNT3	MUC3A	9606.ENSP00000321874	9606.ENSP00000368771	0	0	0	0	0.14	0	0.9	0	0.91
B3GNT3	MUC5AC	9606.ENSP00000321874	9606.ENSP00000485659	0	0	0	0	0.112	0	0.9	0.139	0.916
B3GNT3	MUC5B	9606.ENSP00000321874	9606.ENSP00000436812	0	0	0	0	0.14	0	0.9	0.152	0.92
B3GNT3	MUC13	9606.ENSP00000321874	9606.ENSP00000485028	0	0	0	0	0.152	0	0.9	0.169	0.923
B3GNT3	MUC6	9606.ENSP00000321874	9606.ENSP00000406861	0	0	0	0	0	0	0.9	0.313	0.928
B3GNT3	GCNT3	9606.ENSP00000321874	9606.ENSP00000379377	0	0	0	0	0.1	0	0.9	0.623	0.963
B3GNT6	SLC5A5	9606.ENSP00000484640	9606.ENSP00000222248	0	0	0	0	0.058	0	0	0.39	0.4
B3GNT6	MUC17	9606.ENSP00000484640	9606.ENSP00000302716	0	0	0	0	0.066	0	0.9	0	0.902
B3GNT6	GALNT12	9606.ENSP00000484640	9606.ENSP00000364150	0	0	0	0	0	0	0.65	0.164	0.695
B3GNT6	MUC21	9606.ENSP00000484640	9606.ENSP00000365473	0	0	0	0	0	0	0.9	0	0.9
B3GNT6	MUC3A	9606.ENSP00000484640	9606.ENSP00000368771	0	0	0	0	0	0	0.9	0	0.9
B3GNT6	GCNT3	9606.ENSP00000484640	9606.ENSP00000379377	0	0	0	0	0.088	0	0.9	0.555	0.955
B3GNT6	MUC6	9606.ENSP00000484640	9606.ENSP00000406861	0	0	0	0	0	0	0.9	0.249	0.921
B3GNT6	MUC5B	9606.ENSP00000484640	9606.ENSP00000436812	0	0	0	0	0	0	0.9	0.26	0.922
B3GNT6	MUC13	9606.ENSP00000484640	9606.ENSP00000485028	0	0	0	0	0.059	0	0.9	0.088	0.906
B3GNT6	MUC5AC	9606.ENSP00000484640	9606.ENSP00000485659	0	0	0	0	0	0	0.9	0.136	0.909
B4GALNT2	MSTN	9606.ENSP00000300404	9606.ENSP00000260950	0	0	0	0	0	0	0	0.476	0.476
B4GALNT2	RBM46	9606.ENSP00000300404	9606.ENSP00000281722	0	0	0	0	0	0	0	0.44	0.44
B4GALNT2	HOXB9	9606.ENSP00000300404	9606.ENSP00000309439	0	0	0	0	0	0	0	0.509	0.509
B4GALNT2	B4GALNT4	9606.ENSP00000300404	9606.ENSP00000328277	0	0	0	0	0	0	0	0.646	0.646
B4GALNT4	FUT9	9606.ENSP00000328277	9606.ENSP00000302599	0	0	0	0	0.102	0	0	0.402	0.44
BAGE5	MAGEA10	9606.ENSP00000485185	9606.ENSP00000244096	0	0	0	0	0	0	0	0.549	0.549
BAGE5	CTAG2	9606.ENSP00000485185	9606.ENSP00000247306	0	0	0	0	0	0	0	0.642	0.642
BAGE5	MAGEC1	9606.ENSP00000485185	9606.ENSP00000285879	0	0	0	0	0	0	0	0.644	0.644
BAGE5	MAGEC3	9606.ENSP00000485185	9606.ENSP00000298296	0	0	0	0	0	0	0	0.44	0.44
BAGE5	SAGE1	9606.ENSP00000485185	9606.ENSP00000323191	0	0	0	0	0	0	0	0.622	0.622
BAGE5	MAGEA1	9606.ENSP00000485185	9606.ENSP00000349085	0	0	0	0	0	0	0	0.905	0.905
BAGE5	SPANXC	9606.ENSP00000485185	9606.ENSP00000351884	0	0	0	0	0	0	0	0.416	0.416
BAGE5	MAGEA4	9606.ENSP00000485185	9606.ENSP00000353379	0	0	0	0	0.069	0	0	0.557	0.569
BAGE5	MAGEC2	9606.ENSP00000485185	9606.ENSP00000354660	0	0	0	0	0.065	0	0	0.51	0.522
BAGE5	GAGE2A	9606.ENSP00000485185	9606.ENSP00000355421	0	0	0	0	0.062	0	0	0.904	0.906
BAGE5	SSX1	9606.ENSP00000485185	9606.ENSP00000366118	0	0	0	0	0	0	0	0.555	0.555
BAGE5	MAGEB1	9606.ENSP00000485185	9606.ENSP00000368264	0	0	0	0	0	0	0	0.4	0.4
BAGE5	DDX53	9606.ENSP00000485185	9606.ENSP00000368667	0	0	0	0	0	0	0	0.53	0.53
BAGE5	MAGEA12	9606.ENSP00000485185	9606.ENSP00000377478	0	0	0	0	0.066	0	0	0.57	0.581
BAGE5	PRAME	9606.ENSP00000485185	9606.ENSP00000445675	0	0	0	0	0	0	0	0.669	0.669
BAGE5	MAGEA3	9606.ENSP00000485185	9606.ENSP00000473093	0	0	0	0	0.065	0	0	0.879	0.882
BAGE5	TPTE	9606.ENSP00000485185	9606.ENSP00000484403	0	0	0	0	0	0	0	0.511	0.511
BAGE5	GAGE1	9606.ENSP00000485185	9606.ENSP00000484668	0	0	0	0	0	0	0	0.905	0.905
BAIAP2L2	TBX15	9606.ENSP00000371085	9606.ENSP00000207157	0	0	0	0	0	0	0	0.442	0.442
BAIAP2L2	SLC18A3	9606.ENSP00000371085	9606.ENSP00000363229	0	0	0	0	0	0	0.54	0	0.54
BAIAP2L2	TMEM100	9606.ENSP00000371085	9606.ENSP00000465638	0	0	0	0	0	0	0	0.504	0.504
BARHL2	ISL1	9606.ENSP00000359474	9606.ENSP00000230658	0	0	0	0	0.064	0.263	0	0.453	0.589
BARHL2	NEUROD4	9606.ENSP00000359474	9606.ENSP00000242994	0	0	0	0	0.055	0	0	0.63	0.635
BARHL2	LHX5	9606.ENSP00000359474	9606.ENSP00000261731	0	0	0	0	0.099	0.263	0	0.449	0.602
BARHL2	ZIC1	9606.ENSP00000359474	9606.ENSP00000282928	0	0	0	0	0.259	0.078	0	0.204	0.409
BARHL2	LHX8	9606.ENSP00000359474	9606.ENSP00000294638	0	0	0	0	0.063	0.263	0	0.282	0.461
BARHL2	NEUROD1	9606.ENSP00000359474	9606.ENSP00000295108	0	0	0	0	0.193	0	0	0.447	0.535
BARHL2	ZIC4	9606.ENSP00000359474	9606.ENSP00000435509	0	0	0	0	0.307	0.078	0	0.149	0.409
BARHL2	POU4F1	9606.ENSP00000359474	9606.ENSP00000366413	0	0	0	0	0.064	0	0	0.439	0.452
BARHL2	LHX1	9606.ENSP00000359474	9606.ENSP00000477829	0	0	0	0	0.217	0.263	0	0.355	0.595
BARHL2	LHX2	9606.ENSP00000359474	9606.ENSP00000362717	0	0	0	0	0.119	0.263	0	0.439	0.604
BARX1	ISL1	9606.ENSP00000253968	9606.ENSP00000230658	0	0	0	0	0.048	0.263	0	0.278	0.449
BARX1	SHOX2	9606.ENSP00000253968	9606.ENSP00000374240	0	0	0	0.625	0.061	0.263	0	0.548	0.421
BARX1	DSPP	9606.ENSP00000253968	9606.ENSP00000382213	0	0	0	0	0	0	0	0.457	0.457
BARX1	LHX8	9606.ENSP00000253968	9606.ENSP00000294638	0	0	0	0	0.108	0.263	0	0.629	0.735
BCL2L10	NLRP11	9606.ENSP00000260442	9606.ENSP00000466285	0	0	0	0	0	0	0	0.444	0.444
BCL2L10	CASP14	9606.ENSP00000260442	9606.ENSP00000393417	0	0	0	0	0	0.168	0	0.393	0.473
BCL2L15	ZPBP2	9606.ENSP00000376992	9606.ENSP00000335384	0	0	0	0	0	0	0	0.51	0.51
BHMT	HPDL	9606.ENSP00000274353	9606.ENSP00000335060	0	0	0	0	0.063	0	0	0.418	0.431
BHMT	F2	9606.ENSP00000274353	9606.ENSP00000308541	0	0	0	0	0.102	0	0	0.404	0.442
BHMT	TFAP2A	9606.ENSP00000274353	9606.ENSP00000368924	0	0	0	0	0	0	0	0.549	0.549
BIRC5	MYBL2	9606.ENSP00000301633	9606.ENSP00000217026	0	0	0	0	0.549	0	0	0.57	0.798
BIRC5	DLGAP5	9606.ENSP00000301633	9606.ENSP00000247191	0	0	0	0	0.913	0	0	0.44	0.949
BIRC5	TROAP	9606.ENSP00000301633	9606.ENSP00000257909	0	0	0	0	0.821	0	0	0.099	0.832
BIRC5	NEIL3	9606.ENSP00000301633	9606.ENSP00000264596	0	0	0	0	0.381	0	0	0.135	0.442
BIRC5	DEPDC1B	9606.ENSP00000301633	9606.ENSP00000265036	0	0	0	0	0.436	0	0	0.098	0.469
BIRC5	NUF2	9606.ENSP00000301633	9606.ENSP00000271452	0	0	0	0	0.85	0	0.9	0.376	0.989
BIRC5	MELK	9606.ENSP00000301633	9606.ENSP00000298048	0	0	0	0	0.896	0.085	0	0.413	0.939
BIRC5	TPX2	9606.ENSP00000301633	9606.ENSP00000300403	0	0	0	0	0.932	0	0	0.47	0.962
BIRC5	TERT	9606.ENSP00000301633	9606.ENSP00000309572	0	0	0	0	0.143	0	0	0.342	0.412
BIRC5	CDKN2A	9606.ENSP00000301633	9606.ENSP00000418915	0	0	0	0	0	0.061	0	0.417	0.429
BIRC5	IQGAP3	9606.ENSP00000301633	9606.ENSP00000354451	0	0	0	0	0.482	0	0	0.096	0.512
BIRC5	DEPDC1	9606.ENSP00000301633	9606.ENSP00000412292	0	0	0	0	0.592	0	0	0.251	0.681
BIRC5	KIF18B	9606.ENSP00000301633	9606.ENSP00000465992	0	0	0	0	0.706	0.05	0	0.178	0.75
BIRC5	EXO1	9606.ENSP00000301633	9606.ENSP00000355506	0	0	0	0	0.774	0	0	0.224	0.817
BIRC5	KIF14	9606.ENSP00000301633	9606.ENSP00000356319	0	0	0	0	0.783	0	0	0.264	0.833
BIRC5	MCM10	9606.ENSP00000301633	9606.ENSP00000418268	0	0	0	0	0.782	0	0	0.292	0.839
BIRC5	CDC25C	9606.ENSP00000301633	9606.ENSP00000321656	0	0	0	0	0.724	0	0	0.441	0.839
BIRC5	HJURP	9606.ENSP00000301633	9606.ENSP00000414109	0	0	0	0	0.887	0	0	0.211	0.907
BIRC5	NEK2	9606.ENSP00000301633	9606.ENSP00000355966	0	0	0	0	0.893	0	0	0.479	0.942
BIRC5	KIF4A	9606.ENSP00000301633	9606.ENSP00000363524	0	0	0	0	0.907	0	0	0.471	0.948
BIRC5	TOP2A	9606.ENSP00000301633	9606.ENSP00000411532	0	0	0	0	0.883	0	0	0.589	0.95
BIRC5	UBE2C	9606.ENSP00000301633	9606.ENSP00000348838	0	0	0	0	0.956	0.193	0	0.579	0.983
BIRC5	CENPA	9606.ENSP00000301633	9606.ENSP00000336868	0	0	0	0	0.782	0.097	0.9	0.471	0.988
BIRC5	CENPF	9606.ENSP00000301633	9606.ENSP00000355922	0	0	0	0	0.809	0	0.9	0.548	0.99
BIRC5	KIF2C	9606.ENSP00000301633	9606.ENSP00000361298	0	0	0	0	0.872	0	0.9	0.447	0.992
BIRC5	CDC20	9606.ENSP00000301633	9606.ENSP00000361540	0	0	0	0	0.965	0.064	0.9	0.61	0.998
BPIFA1	BPIFB2	9606.ENSP00000346251	9606.ENSP00000170150	0	0	0	0	0.055	0	0	0.732	0.736
BPIFA1	LBP	9606.ENSP00000346251	9606.ENSP00000217407	0	0	0	0	0.055	0	0	0.715	0.719
BPIFA1	CST4	9606.ENSP00000346251	9606.ENSP00000217423	0	0	0	0	0	0	0	0.511	0.511
BPIFA1	CST1	9606.ENSP00000346251	9606.ENSP00000305731	0	0	0	0	0	0	0	0.471	0.471
BPIFA1	SFTPC	9606.ENSP00000346251	9606.ENSP00000316152	0	0	0	0	0.13	0	0	0.435	0.487
BPIFA1	BPIFB6	9606.ENSP00000346251	9606.ENSP00000344929	0	0	0	0	0.055	0	0	0.684	0.688
BPIFA1	MUC5AC	9606.ENSP00000346251	9606.ENSP00000485659	0	0	0	0	0.09	0	0	0.51	0.535
BPIFA1	MUC5B	9606.ENSP00000346251	9606.ENSP00000436812	0	0	0	0	0.085	0	0	0.515	0.537
BPIFA1	BPIFB4	9606.ENSP00000346251	9606.ENSP00000364632	0	0	0	0	0.055	0	0	0.684	0.688
BPIFA1	COX7B2	9606.ENSP00000346251	9606.ENSP00000379784	0	0	0	0	0	0	0	0.8	0.8
BPIFA2	BPIFB2	9606.ENSP00000253362	9606.ENSP00000170150	0	0	0	0	0.063	0	0	0.63	0.638
BPIFA2	LBP	9606.ENSP00000253362	9606.ENSP00000217407	0	0	0	0	0.063	0	0	0.656	0.663
BPIFA2	CST4	9606.ENSP00000253362	9606.ENSP00000217423	0	0	0	0	0.064	0	0	0.415	0.429
BPIFA2	CST1	9606.ENSP00000253362	9606.ENSP00000305731	0	0	0	0	0.064	0	0	0.417	0.43
BPIFA2	CRISP1	9606.ENSP00000253362	9606.ENSP00000338276	0	0	0	0	0	0	0	0.613	0.613
BPIFA2	BPIFB6	9606.ENSP00000253362	9606.ENSP00000344929	0	0	0	0	0.094	0	0	0.599	0.621
BPIFA2	ZPLD1	9606.ENSP00000253362	9606.ENSP00000307801	0	0	0	0	0	0	0	0.658	0.658
BPIFA2	CA6	9606.ENSP00000253362	9606.ENSP00000366654	0	0	0	0	0	0	0	0.68	0.68
BPIFA2	BPIFB4	9606.ENSP00000253362	9606.ENSP00000364632	0	0	0	0	0.118	0	0	0.669	0.695
BPIFB2	SPP2	9606.ENSP00000170150	9606.ENSP00000168148	0	0	0	0	0	0	0.9	0	0.9
BPIFB2	F2	9606.ENSP00000170150	9606.ENSP00000308541	0	0	0	0	0.416	0	0	0	0.416
BPIFB2	SERPINA7	9606.ENSP00000170150	9606.ENSP00000329374	0	0	0	0	0.521	0	0	0	0.521
BPIFB2	CLDN6	9606.ENSP00000170150	9606.ENSP00000380131	0	0	0	0	0.089	0	0	0.555	0.577
BPIFB2	FGB	9606.ENSP00000170150	9606.ENSP00000306099	0	0	0	0	0.3	0	0	0.464	0.609
BPIFB2	CHGB	9606.ENSP00000170150	9606.ENSP00000368244	0	0	0	0	0	0	0.9	0	0.9
BPIFB2	VGF	9606.ENSP00000170150	9606.ENSP00000249330	0	0	0	0	0	0	0.9	0	0.9
BPIFB2	SPP1	9606.ENSP00000170150	9606.ENSP00000378517	0	0	0	0	0.064	0	0.9	0.05	0.903
BPIFB2	CP	9606.ENSP00000170150	9606.ENSP00000264613	0	0	0	0	0.117	0	0.9	0.055	0.909
BPIFB2	PROC	9606.ENSP00000170150	9606.ENSP00000234071	0	0	0	0	0.142	0	0.9	0	0.91
BPIFB2	TF	9606.ENSP00000170150	9606.ENSP00000385834	0	0	0	0	0.143	0	0.9	0.138	0.919
BPIFB2	IGFBP1	9606.ENSP00000170150	9606.ENSP00000275525	0	0	0	0	0.503	0	0.9	0	0.948
BPIFB2	FGA	9606.ENSP00000170150	9606.ENSP00000306361	0	0	0	0	0.434	0	0.9	0.338	0.959
BPIFB6	CDK5R2	9606.ENSP00000344929	9606.ENSP00000304250	0	0	0	0	0.506	0	0	0	0.506
BPIFB6	CGA	9606.ENSP00000344929	9606.ENSP00000482232	0	0	0	0	0.511	0	0	0	0.511
BRDT	MAGEC1	9606.ENSP00000387822	9606.ENSP00000285879	0	0	0	0	0	0	0	0.51	0.51
BRDT	SAGE1	9606.ENSP00000387822	9606.ENSP00000323191	0	0	0	0	0.084	0	0	0.511	0.532
BRDT	H1FNT	9606.ENSP00000387822	9606.ENSP00000334805	0	0	0	0	0.061	0	0	0.57	0.579
BRDT	MAGEC2	9606.ENSP00000387822	9606.ENSP00000354660	0	0	0	0	0	0	0	0.511	0.511
BRDT	TAF7L	9606.ENSP00000387822	9606.ENSP00000361998	0	0	0	0	0.148	0.34	0	0.233	0.531
C10orf90	INS	9606.ENSP00000284694	9606.ENSP00000380432	0	0	0	0	0	0	0	0.451	0.451
C10orf90	TEX37	9606.ENSP00000284694	9606.ENSP00000307142	0	0	0	0	0.061	0	0	0.495	0.505
C11orf86	EPS8L3	9606.ENSP00000311479	9606.ENSP00000358820	0	0	0	0	0	0	0	0.513	0.513
C14orf105	PSG6	9606.ENSP00000392368	9606.ENSP00000292125	0	0	0	0	0	0	0	0.458	0.457
C14orf105	TM4SF4	9606.ENSP00000392368	9606.ENSP00000305852	0	0	0	0	0.077	0	0	0.552	0.569
C14orf105	CCDC185	9606.ENSP00000392368	9606.ENSP00000355840	0	0	0	0	0	0	0	0.43	0.43
C16orf59	SERTM1	9606.ENSP00000355022	9606.ENSP00000325776	0	0	0	0	0	0	0	0.776	0.776
C1QL2	TFAP2D	9606.ENSP00000272520	9606.ENSP00000008391	0	0	0	0	0.055	0	0	0.591	0.597
C1QL2	PLK5	9606.ENSP00000272520	9606.ENSP00000466248	0	0	0	0	0.213	0	0	0.284	0.412
C2CD4A	DUSP9	9606.ENSP00000347712	9606.ENSP00000345853	0	0	0	0	0	0	0	0.4	0.4
C6orf15	EEF1A2	9606.ENSP00000259870	9606.ENSP00000217182	0	0	0	0	0	0	0	0.56	0.56
C6orf15	INS	9606.ENSP00000259870	9606.ENSP00000380432	0	0	0	0	0	0	0	0.497	0.497
C6orf15	PRSS3	9606.ENSP00000259870	9606.ENSP00000354280	0	0	0	0	0	0	0	0.921	0.921
CA10	CYP24A1	9606.ENSP00000405388	9606.ENSP00000216862	0	0	0	0	0	0	0	0.588	0.588
CA10	CALY	9606.ENSP00000405388	9606.ENSP00000252939	0	0	0	0	0.441	0	0	0	0.441
CA10	CELF3	9606.ENSP00000405388	9606.ENSP00000290583	0	0	0	0	0.449	0	0	0	0.449
CA10	NGB	9606.ENSP00000405388	9606.ENSP00000298352	0	0	0	0	0.533	0	0	0	0.533
CA10	CA4	9606.ENSP00000405388	9606.ENSP00000300900	0	0	0.439	0.675	0.128	0	0	0.781	0.435
CA10	NTSR2	9606.ENSP00000405388	9606.ENSP00000303686	0	0	0	0	0.475	0	0	0	0.475
CA10	CDK5R2	9606.ENSP00000405388	9606.ENSP00000304250	0	0	0	0	0.43	0	0	0	0.43
CA10	RBFOX1	9606.ENSP00000405388	9606.ENSP00000309117	0	0	0	0	0.53	0	0	0.305	0.66
CA10	SULT4A1	9606.ENSP00000405388	9606.ENSP00000332565	0	0	0	0	0.379	0	0	0.074	0.401
CA10	HRH3	9606.ENSP00000405388	9606.ENSP00000342560	0	0	0	0	0.409	0	0	0	0.408
CA10	CPLX2	9606.ENSP00000405388	9606.ENSP00000352544	0	0	0	0	0.44	0	0	0	0.44
CA10	SPP1	9606.ENSP00000405388	9606.ENSP00000378517	0	0	0	0	0.084	0	0	0.442	0.467
CA10	CRHR1	9606.ENSP00000405388	9606.ENSP00000381333	0	0	0	0	0.425	0	0	0	0.425
CA10	NXPH1	9606.ENSP00000405388	9606.ENSP00000384551	0	0	0	0	0.432	0	0	0	0.432
CA10	CNTNAP4	9606.ENSP00000405388	9606.ENSP00000479811	0	0	0	0	0.463	0	0	0.131	0.513
CA10	GABRG2	9606.ENSP00000405388	9606.ENSP00000410732	0	0	0	0	0.531	0	0	0	0.531
CA10	SYNPR	9606.ENSP00000405388	9606.ENSP00000418994	0	0	0	0	0.532	0	0	0.103	0.562
CA4	CYP24A1	9606.ENSP00000300900	9606.ENSP00000216862	0	0	0	0	0	0	0	0.739	0.739
CA4	KCNV1	9606.ENSP00000300900	9606.ENSP00000435954	0	0	0	0	0	0	0	0.5	0.499
CA6	CYP24A1	9606.ENSP00000366654	9606.ENSP00000216862	0	0	0	0	0	0	0	0.797	0.797
CA6	CST4	9606.ENSP00000366654	9606.ENSP00000217423	0	0	0	0	0	0	0	0.478	0.478
CA6	CST1	9606.ENSP00000366654	9606.ENSP00000305731	0	0	0	0	0	0	0	0.532	0.532
CA6	TAS2R38	9606.ENSP00000366654	9606.ENSP00000448219	0	0	0	0	0	0	0	0.669	0.669
CA9	CYP24A1	9606.ENSP00000367608	9606.ENSP00000216862	0	0	0	0	0.088	0	0	0.736	0.748
CA9	COL10A1	9606.ENSP00000367608	9606.ENSP00000327368	0	0	0	0	0.064	0	0	0.437	0.451
CA9	PAPL	9606.ENSP00000367608	9606.ENSP00000327557	0	0	0	0	0.05	0	0	0.511	0.515
CA9	SPP1	9606.ENSP00000367608	9606.ENSP00000378517	0	0	0	0	0.064	0	0	0.444	0.457
CA9	SLC2A1	9606.ENSP00000367608	9606.ENSP00000416293	0	0	0	0	0.076	0	0	0.739	0.748
CABYR	DMRTC2	9606.ENSP00000483621	9606.ENSP00000269945	0	0	0	0	0	0	0	0.451	0.451
CABYR	ZPBP2	9606.ENSP00000483621	9606.ENSP00000335384	0	0	0	0	0	0	0	0.509	0.509
CABYR	FMR1NB	9606.ENSP00000483621	9606.ENSP00000359498	0	0	0	0	0	0	0	0.545	0.545
CALB1	ISL1	9606.ENSP00000265431	9606.ENSP00000230658	0	0	0	0	0.051	0.077	0	0.508	0.532
CALB1	NTS	9606.ENSP00000265431	9606.ENSP00000256010	0	0	0	0	0.078	0	0	0.499	0.518
CALB1	LHX1	9606.ENSP00000265431	9606.ENSP00000477829	0	0	0	0	0.097	0.077	0	0.345	0.406
CALB1	HAVCR1	9606.ENSP00000265431	9606.ENSP00000344844	0	0	0	0	0	0	0	0.429	0.429
CALB1	KCNQ2	9606.ENSP00000265431	9606.ENSP00000352035	0	0	0	0	0.14	0.308	0	0.119	0.43
CALB1	SLC6A3	9606.ENSP00000265431	9606.ENSP00000270349	0	0	0	0	0.06	0	0	0.425	0.436
CALB1	HTR3A	9606.ENSP00000265431	9606.ENSP00000347754	0	0	0	0	0.063	0	0	0.434	0.447
CALB1	GAL	9606.ENSP00000265431	9606.ENSP00000265643	0	0	0	0	0	0	0	0.447	0.447
CALB1	FOXG1	9606.ENSP00000265431	9606.ENSP00000339004	0	0	0	0	0.062	0.172	0	0.374	0.471
CALB1	ENSG00000258947	9606.ENSP00000265431	9606.ENSP00000320295	0	0	0	0	0.064	0.133	0	0.431	0.498
CALB1	KCNC2	9606.ENSP00000265431	9606.ENSP00000449253	0	0	0	0	0.096	0.185	0	0.395	0.516
CALB1	GRIA1	9606.ENSP00000265431	9606.ENSP00000428994	0	0	0	0	0.098	0.057	0	0.479	0.518
CALB1	FABP7	9606.ENSP00000265431	9606.ENSP00000357429	0	0	0	0	0.092	0	0	0.491	0.518
CALB1	NEUROD1	9606.ENSP00000265431	9606.ENSP00000295108	0	0	0	0	0.107	0	0	0.486	0.522
CALB1	OTX2	9606.ENSP00000265431	9606.ENSP00000343819	0	0	0	0	0.122	0	0	0.48	0.524
CALB1	PCP4	9606.ENSP00000265431	9606.ENSP00000329403	0	0	0	0	0.099	0	0	0.496	0.527
CALB1	CALCA	9606.ENSP00000265431	9606.ENSP00000331746	0	0	0	0	0.051	0	0	0.538	0.543
CALB1	SLC18A3	9606.ENSP00000265431	9606.ENSP00000363229	0	0	0	0	0.091	0	0	0.52	0.545
CALB1	POU4F1	9606.ENSP00000265431	9606.ENSP00000366413	0	0	0	0	0.062	0.055	0	0.591	0.606
CALB1	COCH	9606.ENSP00000265431	9606.ENSP00000379862	0	0	0	0	0	0	0	0.629	0.629
CALB1	TAC1	9606.ENSP00000265431	9606.ENSP00000321106	0	0	0	0	0.09	0	0	0.669	0.686
CALB1	CHAT	9606.ENSP00000265431	9606.ENSP00000337103	0	0	0	0	0.061	0	0	0.749	0.754
CALB1	NPY	9606.ENSP00000265431	9606.ENSP00000384364	0	0	0	0	0.061	0	0	0.753	0.758
CALB1	SST	9606.ENSP00000265431	9606.ENSP00000287641	0	0	0	0	0.073	0	0	0.762	0.77
CALB1	GAD1	9606.ENSP00000265431	9606.ENSP00000350928	0	0	0	0	0.165	0.129	0	0.75	0.802
CALCA	CEACAM5	9606.ENSP00000331746	9606.ENSP00000221992	0	0	0	0	0	0	0	0.737	0.737
CALCA	TNNC1	9606.ENSP00000331746	9606.ENSP00000232975	0	0	0	0	0	0	0	0.558	0.558
CALCA	IAPP	9606.ENSP00000331746	9606.ENSP00000240652	0	0	0	0	0	0	0.9	0.862	0.985
CALCA	GNGT1	9606.ENSP00000331746	9606.ENSP00000248572	0	0	0	0	0	0	0.9	0	0.9
CALCA	SSTR4	9606.ENSP00000331746	9606.ENSP00000255008	0	0	0	0	0	0	0	0.45	0.45
CALCA	CRP	9606.ENSP00000331746	9606.ENSP00000255030	0	0	0	0	0	0	0	0.579	0.579
CALCA	NTS	9606.ENSP00000331746	9606.ENSP00000256010	0	0	0	0	0	0	0	0.713	0.713
CALCA	GAL	9606.ENSP00000331746	9606.ENSP00000265643	0	0	0	0	0	0	0	0.798	0.798
CALCA	SST	9606.ENSP00000331746	9606.ENSP00000287641	0	0	0	0	0.064	0	0	0.851	0.855
CALCA	SSTR5	9606.ENSP00000331746	9606.ENSP00000293897	0	0	0	0	0	0	0	0.47	0.47
CALCA	TAC1	9606.ENSP00000331746	9606.ENSP00000321106	0	0	0	0	0.061	0	0	0.928	0.929
CALCA	TRPM8	9606.ENSP00000331746	9606.ENSP00000323926	0	0	0	0	0	0	0	0.614	0.614
CALCA	GAST	9606.ENSP00000331746	9606.ENSP00000331358	0	0	0	0	0	0	0	0.738	0.738
CALCA	TAC3	9606.ENSP00000331746	9606.ENSP00000483110	0	0	0	0	0	0	0	0.543	0.543
CALCA	HTR3A	9606.ENSP00000331746	9606.ENSP00000347754	0	0	0	0	0.061	0	0	0.541	0.55
CALCA	SLC18A3	9606.ENSP00000331746	9606.ENSP00000363229	0	0	0	0	0	0	0	0.589	0.589
CALCA	SPP1	9606.ENSP00000331746	9606.ENSP00000378517	0	0	0	0	0	0	0	0.597	0.597
CALCA	TNFSF11	9606.ENSP00000331746	9606.ENSP00000381775	0	0	0	0	0.061	0	0	0.652	0.659
CALCA	CHAT	9606.ENSP00000331746	9606.ENSP00000337103	0	0	0	0	0.055	0	0	0.66	0.664
CALCA	INS	9606.ENSP00000331746	9606.ENSP00000380432	0	0	0	0	0	0	0	0.678	0.678
CALCA	NPY	9606.ENSP00000331746	9606.ENSP00000384364	0	0	0	0	0	0	0	0.869	0.869
CALCA	GNG4	9606.ENSP00000331746	9606.ENSP00000375727	0	0	0	0	0	0	0.9	0	0.9
CALCA	CALCB	9606.ENSP00000331746	9606.ENSP00000433490	0	0	0	0.939	0.088	0	0.9	0.788	0.909
CALCA	CGA	9606.ENSP00000331746	9606.ENSP00000482232	0	0	0	0	0.062	0	0.9	0.14	0.912
CALCA	GCGR	9606.ENSP00000331746	9606.ENSP00000383558	0	0	0	0	0	0	0.9	0.4	0.937
CALCA	CRHR1	9606.ENSP00000331746	9606.ENSP00000381333	0	0	0	0	0.061	0	0.9	0.41	0.939
CALCA	GIP	9606.ENSP00000331746	9606.ENSP00000350005	0	0	0	0	0	0	0.9	0.452	0.942
CALCA	NPSR1	9606.ENSP00000331746	9606.ENSP00000370950	0	0	0	0	0	0	0.9	0.552	0.953
CALCA	GCG	9606.ENSP00000331746	9606.ENSP00000387662	0	0	0	0	0.064	0	0.9	0.728	0.972
CALCB	IAPP	9606.ENSP00000433490	9606.ENSP00000240652	0	0	0	0	0	0	0.9	0.836	0.982
CALCB	GNGT1	9606.ENSP00000433490	9606.ENSP00000248572	0	0	0	0	0	0	0.9	0	0.9
CALCB	TAC1	9606.ENSP00000433490	9606.ENSP00000321106	0	0	0	0	0	0	0	0.419	0.418
CALCB	GIP	9606.ENSP00000433490	9606.ENSP00000350005	0	0	0	0	0	0	0.9	0	0.9
CALCB	NPSR1	9606.ENSP00000433490	9606.ENSP00000370950	0	0	0	0	0	0	0.9	0.096	0.905
CALCB	GNG4	9606.ENSP00000433490	9606.ENSP00000375727	0	0	0	0	0	0	0.9	0	0.9
CALCB	CRHR1	9606.ENSP00000433490	9606.ENSP00000381333	0	0	0	0	0.062	0	0.9	0.063	0.904
CALCB	GCGR	9606.ENSP00000433490	9606.ENSP00000383558	0	0	0	0	0	0	0.9	0	0.9
CALCB	GCG	9606.ENSP00000433490	9606.ENSP00000387662	0	0	0	0	0	0	0.9	0	0.9
CALCB	CGA	9606.ENSP00000433490	9606.ENSP00000482232	0	0	0	0	0	0	0.9	0	0.9
CALML3	KRT6A	9606.ENSP00000315299	9606.ENSP00000369317	0	0	0	0	0.301	0	0	0.199	0.416
CALML3	CALML5	9606.ENSP00000315299	9606.ENSP00000369689	0	0	0.442	0.929	0.196	0	0.8	0.462	0.842
CALML5	DSG3	9606.ENSP00000369689	9606.ENSP00000257189	0	0	0	0	0	0	0	0.479	0.479
CALML5	S100A7	9606.ENSP00000369689	9606.ENSP00000357712	0	0	0	0	0.214	0	0	0.348	0.465
CALML5	CASP14	9606.ENSP00000369689	9606.ENSP00000393417	0	0	0	0	0.062	0	0	0.4	0.413
CALY	LGI3	9606.ENSP00000252939	9606.ENSP00000302297	0	0	0	0	0.4	0	0	0	0.4
CALY	HRH3	9606.ENSP00000252939	9606.ENSP00000342560	0	0	0	0	0.413	0	0	0	0.413
CALY	NTSR2	9606.ENSP00000252939	9606.ENSP00000303686	0	0	0	0	0.417	0	0	0	0.417
CALY	SYNPR	9606.ENSP00000252939	9606.ENSP00000418994	0	0	0	0	0.419	0	0	0.068	0.436
CALY	CPLX2	9606.ENSP00000252939	9606.ENSP00000352544	0	0	0	0	0.44	0	0	0	0.44
CALY	CELF3	9606.ENSP00000252939	9606.ENSP00000290583	0	0	0	0	0.446	0	0	0	0.446
CALY	NGB	9606.ENSP00000252939	9606.ENSP00000298352	0	0	0	0	0.446	0	0	0	0.446
CALY	GABRG2	9606.ENSP00000252939	9606.ENSP00000410732	0	0	0	0	0.381	0	0	0.158	0.457
CALY	CDK5R2	9606.ENSP00000252939	9606.ENSP00000304250	0	0	0	0	0.472	0	0	0	0.472
CARD14	IL36G	9606.ENSP00000458715	9606.ENSP00000259205	0	0	0	0	0	0	0	0.413	0.412
CARD14	SCUBE1	9606.ENSP00000458715	9606.ENSP00000354080	0	0	0	0	0	0.186	0	0.565	0.63
CARD14	IL36RN	9606.ENSP00000458715	9606.ENSP00000376896	0	0	0	0	0	0	0	0.707	0.707
CARD18	IL37	9606.ENSP00000436691	9606.ENSP00000263326	0	0	0	0	0	0.074	0	0.442	0.461
CASKIN1	RAB26	9606.ENSP00000345436	9606.ENSP00000210187	0	0	0	0	0.123	0	0	0.421	0.47
CASKIN1	KIF1A	9606.ENSP00000345436	9606.ENSP00000438388	0	0	0	0	0.315	0.171	0	0	0.408
CASP14	CYP24A1	9606.ENSP00000393417	9606.ENSP00000216862	0	0	0	0	0	0	0	0.433	0.433
CASP14	PGLYRP3	9606.ENSP00000393417	9606.ENSP00000290722	0	0	0	0	0.061	0.084	0	0.393	0.432
CASP14	SOSTDC1	9606.ENSP00000393417	9606.ENSP00000304930	0	0	0	0	0	0	0	0.447	0.447
CASP14	SPRR1B	9606.ENSP00000393417	9606.ENSP00000306461	0	0	0	0	0.055	0	0.9	0.172	0.914
CASP14	SPRR3	9606.ENSP00000393417	9606.ENSP00000330391	0	0	0	0	0.061	0	0.9	0.085	0.906
CASP14	SPRR2D	9606.ENSP00000393417	9606.ENSP00000357746	0	0	0	0	0	0	0.9	0.17	0.913
CASP14	SPRR1A	9606.ENSP00000393417	9606.ENSP00000357751	0	0	0	0	0.055	0	0.9	0.186	0.916
CASP14	IVL	9606.ENSP00000393417	9606.ENSP00000357753	0	0	0	0	0	0	0.9	0.578	0.955
CASP14	PADI3	9606.ENSP00000393417	9606.ENSP00000364609	0	0	0	0	0	0	0	0.501	0.501
CASP14	KLK6	9606.ENSP00000393417	9606.ENSP00000366047	0	0	0	0	0	0.056	0	0.422	0.431
CASP14	SBSN	9606.ENSP00000393417	9606.ENSP00000430242	0	0	0	0	0	0	0	0.474	0.474
CCDC185	TEX19	9606.ENSP00000355840	9606.ENSP00000331500	0	0	0	0	0	0	0	0.549	0.549
CCDC185	SMC1B	9606.ENSP00000355840	9606.ENSP00000350036	0	0	0	0	0.077	0	0	0.422	0.443
CCDC185	PRAP1	9606.ENSP00000355840	9606.ENSP00000416126	0	0	0	0	0	0	0	0.541	0.541
CD300LG	UGT3A1	9606.ENSP00000321005	9606.ENSP00000274278	0	0	0	0	0.624	0	0	0	0.624
CD5L	HRG	9606.ENSP00000357156	9606.ENSP00000232003	0	0	0	0	0.078	0	0	0.647	0.661
CD5L	UGT1A6	9606.ENSP00000357156	9606.ENSP00000303174	0	0	0	0	0.063	0	0	0.641	0.649
CD5L	UGT1A8	9606.ENSP00000357156	9606.ENSP00000304845	0	0	0	0	0.063	0	0	0.64	0.648
CD5L	UGT1A1	9606.ENSP00000357156	9606.ENSP00000362549	0	0	0	0	0.063	0	0	0.641	0.649
CDC20	MYBL2	9606.ENSP00000361540	9606.ENSP00000217026	0	0	0	0	0.644	0.08	0	0.428	0.797
CDC20	DLGAP5	9606.ENSP00000361540	9606.ENSP00000247191	0	0	0	0	0.983	0	0	0.479	0.99
CDC20	TROAP	9606.ENSP00000361540	9606.ENSP00000257909	0	0	0	0	0.925	0	0	0.098	0.93
CDC20	NEIL3	9606.ENSP00000361540	9606.ENSP00000264596	0	0	0	0	0.435	0	0	0.043	0.436
CDC20	DEPDC1B	9606.ENSP00000361540	9606.ENSP00000265036	0	0	0	0	0.521	0	0	0.088	0.545
CDC20	NUF2	9606.ENSP00000361540	9606.ENSP00000271452	0	0	0	0	0.922	0	0.9	0.582	0.996
CDC20	MELK	9606.ENSP00000361540	9606.ENSP00000298048	0	0	0	0	0.963	0.056	0	0.445	0.979
CDC20	TPX2	9606.ENSP00000361540	9606.ENSP00000300403	0	0	0	0	0.922	0	0	0.473	0.957
CDC20	CDC25C	9606.ENSP00000361540	9606.ENSP00000321656	0	0	0	0	0.642	0.41	0	0.647	0.919
CDC20	CENPA	9606.ENSP00000361540	9606.ENSP00000336868	0	0	0	0	0.781	0.091	0.9	0.581	0.99
CDC20	UBE2C	9606.ENSP00000361540	9606.ENSP00000348838	0	0	0	0	0.982	0.905	0.9	0.866	0.999
CDC20	CPLX2	9606.ENSP00000361540	9606.ENSP00000352544	0	0	0	0	0	0	0	0.646	0.646
CDC20	IQGAP3	9606.ENSP00000361540	9606.ENSP00000354451	0	0	0	0	0.596	0.162	0	0.218	0.712
CDC20	EXO1	9606.ENSP00000361540	9606.ENSP00000355506	0	0	0	0	0.598	0.071	0	0.18	0.667
CDC20	CENPF	9606.ENSP00000361540	9606.ENSP00000355922	0	0	0	0	0.839	0	0.9	0.596	0.992
CDC20	NEK2	9606.ENSP00000361540	9606.ENSP00000355966	0	0	0	0	0.948	0.993	0.9	0.81	0.999
CDC20	KIF14	9606.ENSP00000361540	9606.ENSP00000356319	0	0	0	0	0.796	0.078	0	0.303	0.857
CDC20	KIF2C	9606.ENSP00000361540	9606.ENSP00000361298	0	0	0	0	0.958	0.078	0.9	0.579	0.998
CDC20	CDKN2A	9606.ENSP00000361540	9606.ENSP00000418915	0	0	0	0	0.065	0.123	0	0.358	0.427
CDC20	SAPCD2	9606.ENSP00000361540	9606.ENSP00000386348	0	0	0	0	0.534	0	0	0.056	0.541
CDC20	PLK5	9606.ENSP00000361540	9606.ENSP00000466248	0	0	0	0	0.148	0.167	0	0.408	0.543
CDC20	DEPDC1	9606.ENSP00000361540	9606.ENSP00000412292	0	0	0	0	0.649	0	0	0.242	0.723
CDC20	MCM10	9606.ENSP00000361540	9606.ENSP00000418268	0	0	0	0	0.731	0	0	0.355	0.819
CDC20	HJURP	9606.ENSP00000361540	9606.ENSP00000414109	0	0	0	0	0.889	0	0	0.266	0.915
CDC20	KIF18B	9606.ENSP00000361540	9606.ENSP00000465992	0	0	0	0	0.895	0.185	0	0.099	0.916
CDC20	KIF4A	9606.ENSP00000361540	9606.ENSP00000363524	0	0	0	0	0.937	0.078	0	0.417	0.963
CDC20	TOP2A	9606.ENSP00000361540	9606.ENSP00000411532	0	0	0	0	0.968	0	0	0.579	0.986
CDC25C	MYBL2	9606.ENSP00000321656	9606.ENSP00000217026	0	0	0	0	0.412	0.179	0	0.411	0.691
CDC25C	DLGAP5	9606.ENSP00000321656	9606.ENSP00000247191	0	0	0	0	0.789	0	0	0.194	0.823
CDC25C	TROAP	9606.ENSP00000321656	9606.ENSP00000257909	0	0	0	0	0.708	0	0	0.196	0.755
CDC25C	NEIL3	9606.ENSP00000321656	9606.ENSP00000264596	0	0	0	0	0.55	0	0	0.043	0.551
CDC25C	DEPDC1B	9606.ENSP00000321656	9606.ENSP00000265036	0	0	0	0	0.554	0	0	0.096	0.58
CDC25C	NUF2	9606.ENSP00000321656	9606.ENSP00000271452	0	0	0	0	0.574	0	0	0.144	0.62
CDC25C	MELK	9606.ENSP00000321656	9606.ENSP00000298048	0	0	0	0	0.709	0.113	0	0.399	0.832
CDC25C	TPX2	9606.ENSP00000321656	9606.ENSP00000300403	0	0	0	0	0.763	0	0	0.26	0.817
CDC25C	CDKN2A	9606.ENSP00000321656	9606.ENSP00000418915	0	0	0	0	0	0.094	0	0.399	0.432
CDC25C	KIF18B	9606.ENSP00000321656	9606.ENSP00000465992	0	0	0	0	0.431	0.185	0	0.093	0.543
CDC25C	SPDYC	9606.ENSP00000321656	9606.ENSP00000366390	0	0	0	0	0	0	0.6	0	0.6
CDC25C	DEPDC1	9606.ENSP00000321656	9606.ENSP00000412292	0	0	0	0	0.588	0	0	0.086	0.607
CDC25C	PLK5	9606.ENSP00000321656	9606.ENSP00000466248	0	0	0	0	0.11	0.08	0	0.646	0.685
CDC25C	MCM10	9606.ENSP00000321656	9606.ENSP00000418268	0	0	0	0	0.655	0	0	0.204	0.714
CDC25C	EXO1	9606.ENSP00000321656	9606.ENSP00000355506	0	0	0	0	0.686	0	0	0.212	0.742
CDC25C	KIF14	9606.ENSP00000321656	9606.ENSP00000356319	0	0	0	0	0.68	0.087	0	0.201	0.746
CDC25C	TOP2A	9606.ENSP00000321656	9606.ENSP00000411532	0	0	0	0	0.637	0	0	0.372	0.762
CDC25C	CENPF	9606.ENSP00000321656	9606.ENSP00000355922	0	0	0	0	0.692	0	0	0.315	0.78
CDC25C	HJURP	9606.ENSP00000321656	9606.ENSP00000414109	0	0	0	0	0.781	0	0	0.049	0.783
CDC25C	CENPA	9606.ENSP00000321656	9606.ENSP00000336868	0	0	0	0	0.722	0	0	0.269	0.788
CDC25C	NEK2	9606.ENSP00000321656	9606.ENSP00000355966	0	0	0	0	0.7	0	0	0.417	0.818
CDC25C	UBE2C	9606.ENSP00000321656	9606.ENSP00000348838	0	0	0	0	0.753	0.126	0	0.308	0.838
CDC25C	KIF4A	9606.ENSP00000321656	9606.ENSP00000363524	0	0	0	0	0.808	0.087	0	0.226	0.852
CDC25C	KIF2C	9606.ENSP00000321656	9606.ENSP00000361298	0	0	0	0	0.802	0.087	0	0.334	0.869
CDH17	USH1C	9606.ENSP00000027335	9606.ENSP00000005226	0	0	0	0	0.069	0.19	0	0.426	0.529
CDH17	CDKN2A	9606.ENSP00000027335	9606.ENSP00000418915	0	0	0	0	0	0.057	0	0.414	0.423
CDH17	RHOV	9606.ENSP00000027335	9606.ENSP00000220507	0	0	0	0	0	0.053	0	0.421	0.428
CDH17	WNT3A	9606.ENSP00000027335	9606.ENSP00000284523	0	0	0	0	0	0.09	0	0.441	0.469
CDH17	INS	9606.ENSP00000027335	9606.ENSP00000380432	0	0	0	0	0	0	0	0.502	0.502
CDH17	CDHR5	9606.ENSP00000027335	9606.ENSP00000351118	0	0	0	0	0.098	0	0	0.529	0.557
CDH17	OLFM4	9606.ENSP00000027335	9606.ENSP00000219022	0	0	0	0	0.077	0	0	0.558	0.575
CDH17	SLC15A1	9606.ENSP00000027335	9606.ENSP00000365686	0	0	0	0	0.126	0	0	0.535	0.577
CDH17	CDX2	9606.ENSP00000027335	9606.ENSP00000370408	0	0	0	0	0.098	0	0	0.664	0.685
CDH17	CDH18	9606.ENSP00000027335	9606.ENSP00000425093	0	0	0	0.654	0	0	0.9	0.641	0.921
CDH18	NETO1	9606.ENSP00000425093	9606.ENSP00000313088	0	0	0	0	0.078	0	0	0.399	0.423
CDHR2	USH1C	9606.ENSP00000424565	9606.ENSP00000005226	0	0	0	0	0.126	0.419	0	0.538	0.745
CDHR2	CDHR5	9606.ENSP00000424565	9606.ENSP00000351118	0	0	0	0	0.284	0.313	0	0.75	0.866
CDHR5	USH1C	9606.ENSP00000351118	9606.ENSP00000005226	0	0	0	0	0.156	0.419	0	0.526	0.747
CDHR5	MUC3A	9606.ENSP00000351118	9606.ENSP00000368771	0	0	0	0	0.104	0	0	0.4	0.439
CDHR5	CDX2	9606.ENSP00000351118	9606.ENSP00000370408	0	0	0	0	0.139	0	0	0.445	0.501
CDK5R2	VIL1	9606.ENSP00000304250	9606.ENSP00000248444	0	0	0	0	0.056	0	0	0.392	0.402
CDK5R2	CELF3	9606.ENSP00000304250	9606.ENSP00000290583	0	0	0	0	0.505	0	0	0.196	0.585
CDK5R2	NEUROD1	9606.ENSP00000304250	9606.ENSP00000295108	0	0	0	0	0.567	0	0	0.17	0.626
CDK5R2	PTPRN	9606.ENSP00000304250	9606.ENSP00000295718	0	0	0	0	0.352	0	0	0.336	0.552
CDK5R2	LGI3	9606.ENSP00000304250	9606.ENSP00000302297	0	0	0	0	0.427	0	0	0	0.427
CDK5R2	HRH3	9606.ENSP00000304250	9606.ENSP00000342560	0	0	0	0	0.377	0.078	0	0	0.401
CDK5R2	KIF1A	9606.ENSP00000304250	9606.ENSP00000438388	0	0	0	0	0.347	0	0	0.14	0.415
CDK5R2	SYNPR	9606.ENSP00000304250	9606.ENSP00000418994	0	0	0	0	0.374	0	0	0.113	0.421
CDK5R2	PCSK1	9606.ENSP00000304250	9606.ENSP00000308024	0	0	0	0	0.168	0	0	0.348	0.435
CDK5R2	NPTX1	9606.ENSP00000304250	9606.ENSP00000307549	0	0	0	0	0.535	0	0	0	0.535
CDK5R2	CPLX2	9606.ENSP00000304250	9606.ENSP00000352544	0	0	0	0	0.501	0	0	0.145	0.555
CDK5R2	CHGB	9606.ENSP00000304250	9606.ENSP00000368244	0	0	0	0	0.347	0	0	0.45	0.625
CDKN2A	KRT20	9606.ENSP00000418915	9606.ENSP00000167588	0	0	0	0	0	0.1	0	0.398	0.435
CDKN2A	MYBL2	9606.ENSP00000418915	9606.ENSP00000217026	0	0	0	0	0.075	0.084	0	0.596	0.628
CDKN2A	CEACAM5	9606.ENSP00000418915	9606.ENSP00000221992	0	0	0	0	0	0	0	0.474	0.474
CDKN2A	TFPI2	9606.ENSP00000418915	9606.ENSP00000222543	0	0	0	0	0	0	0	0.65	0.65
CDKN2A	DNMT3A	9606.ENSP00000418915	9606.ENSP00000264709	0	0	0	0	0	0	0	0.585	0.585
CDKN2A	MYCN	9606.ENSP00000418915	9606.ENSP00000281043	0	0	0	0	0	0.313	0	0.72	0.799
CDKN2A	CRABP1	9606.ENSP00000418915	9606.ENSP00000299529	0	0	0	0	0	0	0	0.556	0.556
CDKN2A	PRSS1	9606.ENSP00000418915	9606.ENSP00000308720	0	0	0	0	0	0.054	0	0.496	0.502
CDKN2A	TERT	9606.ENSP00000418915	9606.ENSP00000309572	0	0	0	0	0.061	0.167	0	0.702	0.746
CDKN2A	CDX2	9606.ENSP00000418915	9606.ENSP00000370408	0	0	0	0	0	0.05	0	0.476	0.481
CDKN2A	INS	9606.ENSP00000418915	9606.ENSP00000380432	0	0	0	0	0	0	0	0.584	0.584
CDKN2A	TNFSF11	9606.ENSP00000418915	9606.ENSP00000381775	0	0	0	0	0	0	0	0.679	0.679
CDKN2A	TOP2A	9606.ENSP00000418915	9606.ENSP00000411532	0	0	0	0	0	0.081	0	0.438	0.461
CDKN2A	MCM10	9606.ENSP00000418915	9606.ENSP00000418268	0	0	0	0	0.049	0.757	0	0.134	0.782
CDKN2A	HMGA2	9606.ENSP00000418915	9606.ENSP00000437621	0	0	0	0	0	0	0	0.491	0.491
CDX2	KRT20	9606.ENSP00000370408	9606.ENSP00000167588	0	0	0	0	0.298	0	0	0.796	0.85
CDX2	FGF4	9606.ENSP00000370408	9606.ENSP00000168712	0	0	0	0	0.061	0.157	0	0.683	0.727
CDX2	CEACAM5	9606.ENSP00000370408	9606.ENSP00000221992	0	0	0	0	0.083	0	0	0.645	0.66
CDX2	CSF3	9606.ENSP00000370408	9606.ENSP00000225474	0	0	0	0	0	0	0	0.418	0.418
CDX2	ISL1	9606.ENSP00000370408	9606.ENSP00000230658	0	0	0	0	0	0.078	0	0.519	0.537
CDX2	VIL1	9606.ENSP00000370408	9606.ENSP00000248444	0	0	0	0	0.081	0	0	0.451	0.475
CDX2	HNF1A	9606.ENSP00000370408	9606.ENSP00000257555	0	0	0	0	0.065	0.384	0	0.532	0.707
CDX2	LCT	9606.ENSP00000370408	9606.ENSP00000264162	0	0	0	0	0.049	0	0	0.528	0.532
CDX2	WNT3A	9606.ENSP00000370408	9606.ENSP00000284523	0	0	0	0	0.063	0.157	0	0.561	0.623
CDX2	TFF2	9606.ENSP00000370408	9606.ENSP00000291526	0	0	0	0	0	0	0	0.498	0.498
CDX2	RETNLB	9606.ENSP00000370408	9606.ENSP00000295755	0	0	0	0	0.152	0	0	0.441	0.505
CDX2	T	9606.ENSP00000370408	9606.ENSP00000296946	0	0	0	0	0.062	0.097	0	0.634	0.663
CDX2	ONECUT1	9606.ENSP00000370408	9606.ENSP00000302630	0	0	0	0	0.061	0.05	0	0.434	0.451
CDX2	FGF5	9606.ENSP00000370408	9606.ENSP00000311697	0	0	0	0	0	0.157	0	0.599	0.647
CDX2	SOX1	9606.ENSP00000370408	9606.ENSP00000330218	0	0	0	0	0	0.057	0	0.532	0.54
CDX2	GAST	9606.ENSP00000370408	9606.ENSP00000331358	0	0	0	0	0	0	0	0.412	0.412
CDX2	REG4	9606.ENSP00000370408	9606.ENSP00000346158	0	0	0	0	0.14	0.05	0	0.71	0.742
CDX2	SOX3	9606.ENSP00000370408	9606.ENSP00000359567	0	0	0	0	0	0.057	0	0.493	0.502
CDX2	FOXD3	9606.ENSP00000370408	9606.ENSP00000360157	0	0	0	0	0.053	0.053	0	0.569	0.58
CDX2	LIN28A	9606.ENSP00000370408	9606.ENSP00000363314	0	0	0	0	0.063	0	0	0.418	0.431
CDX2	SLC15A1	9606.ENSP00000370408	9606.ENSP00000365686	0	0	0	0	0.063	0	0	0.618	0.627
CDX2	GKN1	9606.ENSP00000370408	9606.ENSP00000367172	0	0	0	0	0	0	0	0.48	0.48
CDX2	IRX4	9606.ENSP00000370408	9606.ENSP00000482393	0	0	0	0	0	0.261	0	0.283	0.448
CDX2	MEX3A	9606.ENSP00000370408	9606.ENSP00000432845	0	0	0	0	0.087	0	0	0.434	0.461
CDX2	MUC6	9606.ENSP00000370408	9606.ENSP00000406861	0	0	0	0	0	0.056	0	0.737	0.741
CDX2	MUC5AC	9606.ENSP00000370408	9606.ENSP00000485659	0	0	0	0	0.051	0.056	0	0.737	0.743
CDX2	GCG	9606.ENSP00000370408	9606.ENSP00000387662	0	0	0	0	0.087	0	0.9	0.323	0.932
CEACAM5	CEACAM7	9606.ENSP00000221992	9606.ENSP00000006724	0	0	0	0.959	0.213	0	0.9	0.711	0.92
CEACAM5	KRT20	9606.ENSP00000221992	9606.ENSP00000167588	0	0	0	0	0.213	0	0	0.79	0.827
CEACAM5	CLEC2A	9606.ENSP00000221992	9606.ENSP00000396163	0	0	0	0	0	0	0	0.419	0.418
CEACAM5	SCGB2A2	9606.ENSP00000221992	9606.ENSP00000227918	0	0	0	0	0	0	0	0.42	0.42
CEACAM5	INS	9606.ENSP00000221992	9606.ENSP00000380432	0	0	0	0	0	0	0	0.422	0.422
CEACAM5	MAGEA3	9606.ENSP00000221992	9606.ENSP00000473093	0	0	0	0	0	0	0	0.445	0.445
CEACAM5	TERT	9606.ENSP00000221992	9606.ENSP00000309572	0	0	0	0	0	0	0	0.448	0.448
CEACAM5	SLC5A5	9606.ENSP00000221992	9606.ENSP00000222248	0	0	0	0	0.063	0	0	0.447	0.459
CEACAM5	MUC6	9606.ENSP00000221992	9606.ENSP00000406861	0	0	0	0	0	0	0	0.49	0.489
CEACAM5	GAST	9606.ENSP00000221992	9606.ENSP00000331358	0	0	0	0	0	0	0	0.511	0.511
CEACAM5	SST	9606.ENSP00000221992	9606.ENSP00000287641	0	0	0	0	0	0	0	0.534	0.534
CEACAM5	F2	9606.ENSP00000221992	9606.ENSP00000308541	0	0	0	0	0.055	0	0	0.555	0.561
CEACAM5	MUC5AC	9606.ENSP00000221992	9606.ENSP00000485659	0	0	0	0	0.093	0	0	0.558	0.581
CEACAM5	CRP	9606.ENSP00000221992	9606.ENSP00000255030	0	0	0	0	0	0	0	0.678	0.678
CEACAM5	GPIHBP1	9606.ENSP00000221992	9606.ENSP00000480053	0	0	0	0	0	0	0.9	0	0.9
CEACAM5	TEX101	9606.ENSP00000221992	9606.ENSP00000472308	0	0	0	0	0	0	0.9	0	0.9
CEACAM5	RAET1L	9606.ENSP00000221992	9606.ENSP00000356310	0	0	0	0	0	0	0.9	0.044	0.9
CEACAM5	LYPD8	9606.ENSP00000221992	9606.ENSP00000466070	0	0	0	0	0	0	0.9	0	0.9
CEACAM5	LY6D	9606.ENSP00000221992	9606.ENSP00000301263	0	0	0	0	0	0	0.9	0	0.9
CEACAM5	LYPD1	9606.ENSP00000221992	9606.ENSP00000380605	0	0	0	0	0	0	0.9	0.057	0.901
CEACAM5	LYPD3	9606.ENSP00000221992	9606.ENSP00000244333	0	0	0	0	0	0	0.9	0.074	0.903
CEACAM5	LY6K	9606.ENSP00000221992	9606.ENSP00000292430	0	0	0	0	0	0	0.9	0.211	0.917
CEACAM7	LYPD1	9606.ENSP00000006724	9606.ENSP00000380605	0	0	0	0	0	0	0.9	0	0.9
CEACAM7	GPIHBP1	9606.ENSP00000006724	9606.ENSP00000480053	0	0	0	0	0	0	0.9	0	0.9
CEACAM7	LY6K	9606.ENSP00000006724	9606.ENSP00000292430	0	0	0	0	0	0	0.9	0	0.9
CEACAM7	TEX101	9606.ENSP00000006724	9606.ENSP00000472308	0	0	0	0	0	0	0.9	0	0.9
CEACAM7	LY6D	9606.ENSP00000006724	9606.ENSP00000301263	0	0	0	0	0	0	0.9	0	0.9
CEACAM7	LYPD3	9606.ENSP00000006724	9606.ENSP00000244333	0	0	0	0	0	0	0.9	0.05	0.9
CEACAM7	RAET1L	9606.ENSP00000006724	9606.ENSP00000356310	0	0	0	0	0	0	0.9	0.058	0.901
CEACAM7	LYPD8	9606.ENSP00000006724	9606.ENSP00000466070	0	0	0	0	0.065	0	0.9	0	0.902
CELF3	ELAVL2	9606.ENSP00000290583	9606.ENSP00000380479	0	0	0	0.636	0.194	0.165	0	0.438	0.404
CELF3	KIF1A	9606.ENSP00000290583	9606.ENSP00000438388	0	0	0	0	0.354	0	0	0.138	0.42
CELF3	CHGB	9606.ENSP00000290583	9606.ENSP00000368244	0	0	0	0	0.363	0	0	0.153	0.437
CELF3	INSM1	9606.ENSP00000290583	9606.ENSP00000312631	0	0	0	0	0.325	0	0	0.305	0.511
CELF3	CPLX2	9606.ENSP00000290583	9606.ENSP00000352544	0	0	0	0	0.531	0	0	0	0.531
CELF3	RBFOX1	9606.ENSP00000290583	9606.ENSP00000309117	0	0	0	0.56	0.369	0.211	0	0.476	0.585
CENPA	MYBL2	9606.ENSP00000336868	9606.ENSP00000217026	0	0	0	0	0.381	0	0	0.36	0.587
CENPA	DLGAP5	9606.ENSP00000336868	9606.ENSP00000247191	0	0	0	0	0.804	0	0	0.412	0.879
CENPA	TROAP	9606.ENSP00000336868	9606.ENSP00000257909	0	0	0	0	0.688	0	0	0.051	0.691
CENPA	NEIL3	9606.ENSP00000336868	9606.ENSP00000264596	0	0	0	0	0.561	0	0	0	0.561
CENPA	DEPDC1B	9606.ENSP00000336868	9606.ENSP00000265036	0	0	0	0	0.537	0	0	0	0.537
CENPA	NUF2	9606.ENSP00000336868	9606.ENSP00000271452	0	0	0	0	0.574	0.162	0.9	0.716	0.988
CENPA	MELK	9606.ENSP00000336868	9606.ENSP00000298048	0	0	0	0	0.821	0.075	0	0.446	0.9
CENPA	TPX2	9606.ENSP00000336868	9606.ENSP00000300403	0	0	0	0	0.823	0	0	0.497	0.907
CENPA	KIF18B	9606.ENSP00000336868	9606.ENSP00000465992	0	0	0	0	0.545	0.08	0	0.167	0.621
CENPA	DEPDC1	9606.ENSP00000336868	9606.ENSP00000412292	0	0	0	0	0.739	0	0	0.33	0.817
CENPA	MCM10	9606.ENSP00000336868	9606.ENSP00000418268	0	0	0	0	0.758	0.166	0	0.229	0.831
CENPA	EXO1	9606.ENSP00000336868	9606.ENSP00000355506	0	0	0	0	0.782	0.078	0	0.229	0.832
CENPA	KIF14	9606.ENSP00000336868	9606.ENSP00000356319	0	0	0	0	0.779	0.08	0	0.312	0.847
CENPA	KIF4A	9606.ENSP00000336868	9606.ENSP00000363524	0	0	0	0	0.78	0.08	0	0.43	0.874
CENPA	NEK2	9606.ENSP00000336868	9606.ENSP00000355966	0	0	0	0	0.772	0	0	0.532	0.888
CENPA	TOP2A	9606.ENSP00000336868	9606.ENSP00000411532	0	0	0	0	0.811	0.18	0	0.463	0.909
CENPA	UBE2C	9606.ENSP00000336868	9606.ENSP00000348838	0	0	0	0	0.892	0.189	0	0.322	0.935
CENPA	CENPF	9606.ENSP00000336868	9606.ENSP00000355922	0	0	0	0	0.786	0	0.9	0.672	0.992
CENPA	KIF2C	9606.ENSP00000336868	9606.ENSP00000361298	0	0	0	0	0.818	0.08	0.9	0.67	0.993
CENPA	HJURP	9606.ENSP00000336868	9606.ENSP00000414109	0	0	0	0	0.82	0.937	0.9	0.925	0.999
CENPF	MYBL2	9606.ENSP00000355922	9606.ENSP00000217026	0	0	0	0	0.511	0	0	0.425	0.707
CENPF	DLGAP5	9606.ENSP00000355922	9606.ENSP00000247191	0	0	0	0	0.932	0	0	0.477	0.963
CENPF	TROAP	9606.ENSP00000355922	9606.ENSP00000257909	0	0	0	0	0.818	0	0	0.112	0.832
CENPF	NEIL3	9606.ENSP00000355922	9606.ENSP00000264596	0	0	0	0	0.581	0	0	0.147	0.627
CENPF	DEPDC1B	9606.ENSP00000355922	9606.ENSP00000265036	0	0	0	0	0.608	0	0	0.089	0.627
CENPF	NUF2	9606.ENSP00000355922	9606.ENSP00000271452	0	0	0	0	0.892	0	0.9	0.601	0.995
CENPF	MELK	9606.ENSP00000355922	9606.ENSP00000298048	0	0	0	0	0.874	0	0	0.427	0.924
CENPF	TPX2	9606.ENSP00000355922	9606.ENSP00000300403	0	0	0	0	0.891	0	0	0.51	0.944
CENPF	UBE2C	9606.ENSP00000355922	9606.ENSP00000348838	0	0	0	0	0.85	0	0	0.51	0.923
CENPF	IQGAP3	9606.ENSP00000355922	9606.ENSP00000354451	0	0	0	0	0.703	0	0	0.138	0.733
CENPF	EXO1	9606.ENSP00000355922	9606.ENSP00000355506	0	0	0	0	0.801	0	0	0.305	0.855
CENPF	RTL1	9606.ENSP00000355922	9606.ENSP00000435342	0	0	0	0	0	0	0	0.529	0.529
CENPF	KIF18B	9606.ENSP00000355922	9606.ENSP00000465992	0	0	0	0	0.639	0	0	0.228	0.71
CENPF	MCM10	9606.ENSP00000355922	9606.ENSP00000418268	0	0	0	0	0.706	0	0	0.269	0.776
CENPF	KIF14	9606.ENSP00000355922	9606.ENSP00000356319	0	0	0	0	0.809	0	0	0.492	0.898
CENPF	KIF4A	9606.ENSP00000355922	9606.ENSP00000363524	0	0	0	0	0.837	0	0	0.423	0.902
CENPF	HJURP	9606.ENSP00000355922	9606.ENSP00000414109	0	0	0	0	0.893	0	0	0.279	0.92
CENPF	DEPDC1	9606.ENSP00000355922	9606.ENSP00000412292	0	0	0	0	0.919	0	0	0.342	0.944
CENPF	NEK2	9606.ENSP00000355922	9606.ENSP00000355966	0	0	0	0	0.893	0	0	0.675	0.963
CENPF	TOP2A	9606.ENSP00000355922	9606.ENSP00000411532	0	0	0	0	0.963	0	0	0.566	0.983
CENPF	KIF2C	9606.ENSP00000355922	9606.ENSP00000361298	0	0	0	0	0.884	0	0.9	0.63	0.995
CFHR4	CRP	9606.ENSP00000356386	9606.ENSP00000255030	0	0	0	0	0.125	0	0	0.578	0.615
CFHR4	MYBPH	9606.ENSP00000356386	9606.ENSP00000255416	0	0	0	0	0	0	0	0.537	0.537
CFHR4	F13B	9606.ENSP00000356386	9606.ENSP00000356382	0	0	0	0.754	0.313	0	0	0.63	0.416
CGA	IAPP	9606.ENSP00000482232	9606.ENSP00000240652	0	0	0	0	0	0	0.9	0.17	0.913
CGA	INHA	9606.ENSP00000482232	9606.ENSP00000243786	0	0	0	0	0	0	0.9	0.043	0.9
CGA	GNGT1	9606.ENSP00000482232	9606.ENSP00000248572	0	0	0	0	0	0	0.9	0	0.9
CGA	NTS	9606.ENSP00000482232	9606.ENSP00000256010	0	0	0	0	0.242	0	0	0.307	0.452
CGA	FETUB	9606.ENSP00000482232	9606.ENSP00000265029	0	0	0	0	0	0	0	0.473	0.473
CGA	SST	9606.ENSP00000482232	9606.ENSP00000287641	0	0	0	0	0	0	0	0.423	0.423
CGA	CGB5	9606.ENSP00000482232	9606.ENSP00000301408	0	0	0	0	0.144	0.379	0	0.173	0.521
CGA	RFX6	9606.ENSP00000482232	9606.ENSP00000332208	0	0	0	0	0.512	0	0	0	0.512
CGA	GH2	9606.ENSP00000482232	9606.ENSP00000333157	0	0	0	0	0.492	0	0	0.09	0.517
CGA	FOXL2	9606.ENSP00000482232	9606.ENSP00000333188	0	0	0	0	0	0	0	0.492	0.492
CGA	CGB	9606.ENSP00000482232	9606.ENSP00000349954	0	0	0	0	0.144	0.379	0	0.546	0.737
CGA	GIP	9606.ENSP00000482232	9606.ENSP00000350005	0	0	0	0	0	0	0.9	0	0.9
CGA	TFAP2A	9606.ENSP00000482232	9606.ENSP00000368924	0	0	0	0	0.065	0	0.9	0	0.902
CGA	NPSR1	9606.ENSP00000482232	9606.ENSP00000370950	0	0	0	0	0	0	0.9	0	0.9
CGA	GNG4	9606.ENSP00000482232	9606.ENSP00000375727	0	0	0	0	0.077	0	0.9	0	0.903
CGA	CRHR1	9606.ENSP00000482232	9606.ENSP00000381333	0	0	0	0	0.064	0	0.9	0.133	0.911
CGA	GCGR	9606.ENSP00000482232	9606.ENSP00000383558	0	0	0	0	0.064	0	0.9	0.05	0.903
CGA	NPY	9606.ENSP00000482232	9606.ENSP00000384364	0	0	0	0	0	0	0	0.541	0.541
CGA	GCG	9606.ENSP00000482232	9606.ENSP00000387662	0	0	0	0	0	0	0.9	0.604	0.958
CGA	CGB8	9606.ENSP00000482232	9606.ENSP00000403649	0	0	0	0	0.144	0	0	0.547	0.595
CGA	GABRR1	9606.ENSP00000482232	9606.ENSP00000412673	0	0	0	0	0	0	0	0.63	0.63
CGB	NGB	9606.ENSP00000349954	9606.ENSP00000298352	0	0	0	0	0.061	0	0	0.541	0.55
CGB	CGB5	9606.ENSP00000349954	9606.ENSP00000301408	0	0	0	0.985	0	0.8	0	0.642	0.801
CGB	CHGB	9606.ENSP00000349954	9606.ENSP00000368244	0	0	0	0	0	0	0	0.8	0.8
CGB	CGB8	9606.ENSP00000349954	9606.ENSP00000403649	0	0	0	0.985	0	0.8	0	0.573	0.801
CGB5	CGB8	9606.ENSP00000301408	9606.ENSP00000403649	0	0	0	0.985	0.213	0.8	0	0.642	0.837
CGB8	NGB	9606.ENSP00000403649	9606.ENSP00000298352	0	0	0	0	0.061	0	0	0.543	0.552
CGB8	CHGB	9606.ENSP00000403649	9606.ENSP00000368244	0	0	0	0	0	0	0	0.83	0.83
CHAT	PHOX2B	9606.ENSP00000337103	9606.ENSP00000226382	0	0	0	0	0.072	0	0	0.449	0.466
CHAT	ISL1	9606.ENSP00000337103	9606.ENSP00000230658	0	0	0	0	0	0	0	0.605	0.605
CHAT	MNX1	9606.ENSP00000337103	9606.ENSP00000252971	0	0	0	0	0	0	0	0.51	0.51
CHAT	NTS	9606.ENSP00000337103	9606.ENSP00000256010	0	0	0	0	0	0	0	0.473	0.473
CHAT	GAL	9606.ENSP00000337103	9606.ENSP00000265643	0	0	0	0	0	0	0	0.581	0.581
CHAT	SLC6A3	9606.ENSP00000337103	9606.ENSP00000270349	0	0	0	0	0.061	0	0	0.428	0.439
CHAT	GLRA3	9606.ENSP00000337103	9606.ENSP00000274093	0	0	0	0	0.047	0	0	0.447	0.451
CHAT	SST	9606.ENSP00000337103	9606.ENSP00000287641	0	0	0	0	0.061	0	0	0.672	0.678
CHAT	LHX8	9606.ENSP00000337103	9606.ENSP00000294638	0	0	0	0	0	0	0	0.453	0.453
CHAT	LGALS4	9606.ENSP00000337103	9606.ENSP00000302100	0	0	0	0	0	0	0	0.424	0.424
CHAT	CHRM1	9606.ENSP00000337103	9606.ENSP00000306490	0	0	0	0	0.054	0	0	0.484	0.491
CHAT	CHRNA9	9606.ENSP00000337103	9606.ENSP00000312663	0	0	0	0	0	0	0	0.711	0.711
CHAT	TAC1	9606.ENSP00000337103	9606.ENSP00000321106	0	0	0	0	0.064	0	0	0.733	0.739
CHAT	IGFL1	9606.ENSP00000337103	9606.ENSP00000415823	0	0	0	0	0	0	0	0.408	0.408
CHAT	POU4F1	9606.ENSP00000337103	9606.ENSP00000366413	0	0	0	0	0.049	0	0	0.514	0.518
CHAT	INS	9606.ENSP00000337103	9606.ENSP00000380432	0	0	0	0	0	0	0	0.661	0.661
CHAT	NPY	9606.ENSP00000337103	9606.ENSP00000384364	0	0	0	0	0	0	0	0.68	0.68
CHAT	GAD1	9606.ENSP00000337103	9606.ENSP00000350928	0	0	0	0	0.081	0	0	0.715	0.727
CHAT	SLC18A3	9606.ENSP00000337103	9606.ENSP00000363229	0	0.06	0	0	0.291	0	0	0.94	0.956
CHGB	SYT13	9606.ENSP00000368244	9606.ENSP00000020926	0	0	0	0	0.292	0.358	0	0.133	0.572
CHGB	SPP2	9606.ENSP00000368244	9606.ENSP00000168148	0	0	0	0	0	0	0.9	0.146	0.91
CHGB	PROC	9606.ENSP00000368244	9606.ENSP00000234071	0	0	0	0	0	0	0.9	0	0.9
CHGB	VGF	9606.ENSP00000368244	9606.ENSP00000249330	0	0	0	0	0.132	0	0.9	0.668	0.968
CHGB	CP	9606.ENSP00000368244	9606.ENSP00000264613	0	0	0	0	0	0	0.9	0.214	0.918
CHGB	IGFBP1	9606.ENSP00000368244	9606.ENSP00000275525	0	0	0	0	0	0	0.9	0	0.9
CHGB	SST	9606.ENSP00000368244	9606.ENSP00000287641	0	0	0	0	0.292	0	0	0.471	0.609
CHGB	PTPRN	9606.ENSP00000368244	9606.ENSP00000295718	0	0	0	0	0.346	0	0	0.348	0.556
CHGB	FGA	9606.ENSP00000368244	9606.ENSP00000306361	0	0	0	0	0	0	0.9	0.151	0.911
CHGB	PCSK1	9606.ENSP00000368244	9606.ENSP00000308024	0	0	0	0	0.187	0	0	0.534	0.605
CHGB	GAST	9606.ENSP00000368244	9606.ENSP00000331358	0	0	0	0	0	0	0	0.408	0.408
CHGB	CPLX2	9606.ENSP00000368244	9606.ENSP00000352544	0	0	0	0	0.375	0	0	0.078	0.4
CHGB	SYT14	9606.ENSP00000368244	9606.ENSP00000355986	0	0	0	0	0.102	0.358	0	0.065	0.414
CHGB	GCG	9606.ENSP00000368244	9606.ENSP00000387662	0	0	0	0	0.106	0	0	0.357	0.4
CHGB	SYT7	9606.ENSP00000368244	9606.ENSP00000444201	0	0	0	0	0.155	0.358	0	0.221	0.541
CHGB	CRHR1	9606.ENSP00000368244	9606.ENSP00000381333	0	0	0	0	0.2	0	0	0.477	0.563
CHGB	NPY	9606.ENSP00000368244	9606.ENSP00000384364	0	0	0	0	0.157	0	0	0.529	0.586
CHGB	SPP1	9606.ENSP00000368244	9606.ENSP00000378517	0	0	0	0	0	0	0.9	0.128	0.909
CHGB	TF	9606.ENSP00000368244	9606.ENSP00000385834	0	0	0	0	0.076	0	0.9	0.1	0.909
CHRM1	KISS1R	9606.ENSP00000306490	9606.ENSP00000234371	0	0	0	0.568	0.063	0	0.9	0.068	0.903
CHRM1	GNGT1	9606.ENSP00000306490	9606.ENSP00000248572	0	0	0	0	0.061	0	0.9	0.042	0.902
CHRM1	NTS	9606.ENSP00000306490	9606.ENSP00000256010	0	0	0	0	0.063	0	0.9	0.118	0.91
CHRM1	NMU	9606.ENSP00000306490	9606.ENSP00000264218	0	0	0	0	0	0	0.9	0.124	0.908
CHRM1	NGB	9606.ENSP00000306490	9606.ENSP00000298352	0	0	0	0	0.457	0	0	0.05	0.462
CHRM1	CHRNA5	9606.ENSP00000306490	9606.ENSP00000299565	0	0	0	0	0	0	0	0.404	0.404
CHRM1	NTSR2	9606.ENSP00000306490	9606.ENSP00000303686	0	0	0	0	0.495	0	0.9	0.125	0.952
CHRM1	GABRG2	9606.ENSP00000306490	9606.ENSP00000410732	0	0	0	0	0.358	0	0	0.121	0.412
CHRM1	SULT4A1	9606.ENSP00000306490	9606.ENSP00000332565	0	0	0	0	0.314	0	0	0.18	0.414
CHRM1	RBFOX1	9606.ENSP00000306490	9606.ENSP00000309117	0	0	0	0	0.349	0	0	0.136	0.414
CHRM1	SOHLH1	9606.ENSP00000306490	9606.ENSP00000404438	0	0	0	0	0.417	0	0	0	0.416
CHRM1	HRH3	9606.ENSP00000306490	9606.ENSP00000342560	0	0	0	0.798	0.389	0	0	0.324	0.425
CHRM1	SYNPR	9606.ENSP00000306490	9606.ENSP00000418994	0	0	0	0	0.426	0	0	0	0.426
CHRM1	SLC18A3	9606.ENSP00000306490	9606.ENSP00000363229	0	0	0	0	0.062	0	0	0.45	0.462
CHRM1	CHRNA2	9606.ENSP00000306490	9606.ENSP00000385026	0	0	0	0	0.108	0	0	0.475	0.512
CHRM1	KCNQ2	9606.ENSP00000306490	9606.ENSP00000352035	0	0	0	0	0.313	0	0	0.479	0.627
CHRM1	NPY	9606.ENSP00000306490	9606.ENSP00000384364	0	0	0	0	0.152	0	0.6	0.215	0.71
CHRM1	F2	9606.ENSP00000306490	9606.ENSP00000308541	0	0	0	0	0	0	0.9	0	0.9
CHRM1	NPSR1	9606.ENSP00000306490	9606.ENSP00000370950	0	0	0	0.565	0	0	0.9	0.094	0.902
CHRM1	GNG4	9606.ENSP00000306490	9606.ENSP00000375727	0	0	0	0	0.062	0	0.9	0	0.902
CHRM1	GCGR	9606.ENSP00000306490	9606.ENSP00000383558	0	0	0	0	0	0	0.9	0.087	0.904
CHRM1	NTSR1	9606.ENSP00000306490	9606.ENSP00000359532	0	0	0	0.561	0.061	0	0.9	0.089	0.904
CHRM1	TAC3	9606.ENSP00000306490	9606.ENSP00000483110	0	0	0	0	0.088	0	0.9	0.087	0.909
CHRM1	GCG	9606.ENSP00000306490	9606.ENSP00000387662	0	0	0	0	0	0	0.9	0.196	0.916
CHRM1	GAST	9606.ENSP00000306490	9606.ENSP00000331358	0	0	0	0	0.051	0	0.9	0.19	0.916
CHRM1	TAC1	9606.ENSP00000306490	9606.ENSP00000321106	0	0	0	0	0.17	0	0.9	0.215	0.929
CHRNA2	CHRNA5	9606.ENSP00000385026	9606.ENSP00000299565	0	0	0	0.937	0.061	0.41	0.9	0.739	0.942
CHRNA2	CHRNA9	9606.ENSP00000385026	9606.ENSP00000312663	0	0	0	0.868	0	0	0.9	0.781	0.91
CHRNA2	KCNQ2	9606.ENSP00000385026	9606.ENSP00000352035	0	0	0	0	0.063	0	0	0.453	0.466
CHRNA2	TAS2R38	9606.ENSP00000385026	9606.ENSP00000448219	0	0	0	0	0	0	0	0.469	0.469
CHRNA5	ITPKA	9606.ENSP00000299565	9606.ENSP00000260386	0	0	0	0	0	0.18	0	0.44	0.521
CHRNA5	SLC6A4	9606.ENSP00000299565	9606.ENSP00000261707	0	0	0	0	0	0	0	0.448	0.448
CHRNA5	TERT	9606.ENSP00000299565	9606.ENSP00000309572	0	0	0	0	0	0	0	0.418	0.418
CHRNA5	SULT4A1	9606.ENSP00000299565	9606.ENSP00000332565	0	0	0	0	0	0	0	0.453	0.453
CHRNA5	CHRNA9	9606.ENSP00000299565	9606.ENSP00000312663	0	0	0	0.857	0	0	0.9	0.672	0.909
CHRNA9	DSG3	9606.ENSP00000312663	9606.ENSP00000257189	0	0	0	0	0	0	0	0.711	0.711
CILP2	SPP2	9606.ENSP00000291495	9606.ENSP00000168148	0	0	0	0	0	0	0	0.444	0.444
CLDN10	CLDN6	9606.ENSP00000299339	9606.ENSP00000380131	0	0	0	0.84	0.066	0	0.9	0.584	0.911
CLDN6	FGF4	9606.ENSP00000380131	9606.ENSP00000168712	0	0	0	0	0.304	0	0	0.213	0.429
CLDN6	EFNA2	9606.ENSP00000380131	9606.ENSP00000215368	0	0	0	0	0.07	0	0	0.494	0.509
CLDN6	OTX2	9606.ENSP00000380131	9606.ENSP00000343819	0	0	0	0	0.238	0	0	0.424	0.542
CLDN6	LIN28A	9606.ENSP00000380131	9606.ENSP00000363314	0	0	0	0	0.356	0	0	0.262	0.505
CLEC2A	GJB6	9606.ENSP00000396163	9606.ENSP00000348521	0	0	0	0	0	0	0	0.539	0.539
CLEC2A	GJB2	9606.ENSP00000396163	9606.ENSP00000372295	0	0	0	0	0	0	0	0.47	0.47
CLEC3B	SPP2	9606.ENSP00000296130	9606.ENSP00000168148	0	0	0	0	0.062	0	0.9	0.346	0.933
CLEC3B	TF	9606.ENSP00000296130	9606.ENSP00000385834	0	0	0	0	0	0	0	0.541	0.541
CLEC3B	SERPINA4	9606.ENSP00000296130	9606.ENSP00000450838	0	0	0	0	0	0	0.9	0	0.9
CLIC5	GABRG3	9606.ENSP00000185206	9606.ENSP00000479113	0	0	0	0	0	0	0.54	0	0.54
CLIC5	GABRR1	9606.ENSP00000185206	9606.ENSP00000412673	0	0	0	0	0	0	0.54	0.041	0.54
CLIC5	GABRQ	9606.ENSP00000185206	9606.ENSP00000469332	0	0	0	0	0	0	0.54	0.041	0.54
CLIC5	GLRA3	9606.ENSP00000185206	9606.ENSP00000274093	0	0	0	0	0	0	0.54	0.046	0.542
CLIC5	PTPRQ	9606.ENSP00000185206	9606.ENSP00000482885	0	0	0	0	0	0	0	0.546	0.546
CLIC5	GABRG2	9606.ENSP00000185206	9606.ENSP00000410732	0	0	0	0	0	0	0.54	0.056	0.547
CLIC5	GABRA5	9606.ENSP00000185206	9606.ENSP00000335592	0	0	0	0	0	0	0.54	0.068	0.552
CLIC5	GABRA3	9606.ENSP00000185206	9606.ENSP00000359337	0	0	0	0	0	0	0.54	0.099	0.567
CLPSL1	TINAG	9606.ENSP00000362968	9606.ENSP00000259782	0	0	0	0	0	0	0	0.421	0.42
CLPSL1	SLCO1B7	9606.ENSP00000362968	9606.ENSP00000394168	0	0	0	0	0	0	0	0.53	0.53
CNGA3	GNGT1	9606.ENSP00000377140	9606.ENSP00000248572	0	0	0	0	0	0	0	0.683	0.683
CNGA3	SLC24A2	9606.ENSP00000377140	9606.ENSP00000344801	0	0	0	0	0.072	0	0	0.602	0.614
CNGA3	RS1	9606.ENSP00000377140	9606.ENSP00000369320	0	0	0	0	0.062	0	0	0.448	0.46
CNGA3	GUCA1A	9606.ENSP00000377140	9606.ENSP00000377784	0	0	0	0	0.061	0.124	0	0.606	0.647
CNTD2	OTOG	9606.ENSP00000396755	9606.ENSP00000382323	0	0	0	0	0.061	0	0	0.434	0.445
CNTD2	GCGR	9606.ENSP00000396755	9606.ENSP00000383558	0	0	0	0	0	0	0	0.442	0.442
CNTD2	PYCR1	9606.ENSP00000396755	9606.ENSP00000384949	0	0	0	0	0	0	0	0.457	0.457
CNTD2	FOXR2	9606.ENSP00000396755	9606.ENSP00000427329	0	0	0	0	0	0.082	0	0.742	0.753
CNTNAP4	RIMS2	9606.ENSP00000479811	9606.ENSP00000262231	0	0	0	0	0.123	0	0	0.414	0.464
CNTNAP4	GPM6A	9606.ENSP00000479811	9606.ENSP00000280187	0	0	0	0	0.329	0	0	0.201	0.441
CNTNAP4	NTSR2	9606.ENSP00000479811	9606.ENSP00000303686	0	0	0	0	0.415	0	0	0	0.414
CNTNAP4	RBFOX1	9606.ENSP00000479811	9606.ENSP00000309117	0	0	0	0	0.378	0	0	0.084	0.406
CNTNAP4	SYNPR	9606.ENSP00000479811	9606.ENSP00000418994	0	0	0	0	0.401	0	0	0	0.4
CNTNAP5	RIMS2	9606.ENSP00000399013	9606.ENSP00000262231	0	0	0	0	0.107	0	0	0.591	0.619
COCH	GJB6	9606.ENSP00000379862	9606.ENSP00000348521	0	0	0	0	0	0	0	0.43	0.43
COCH	COL2A1	9606.ENSP00000379862	9606.ENSP00000369889	0	0	0	0	0.061	0.379	0	0.42	0.632
COCH	GJB2	9606.ENSP00000379862	9606.ENSP00000372295	0	0	0	0	0	0	0	0.634	0.634
COCH	OTOG	9606.ENSP00000379862	9606.ENSP00000382323	0	0	0	0	0	0	0	0.492	0.492
COL10A1	MMP13	9606.ENSP00000327368	9606.ENSP00000260302	0	0	0	0	0	0	0	0.745	0.745
COL10A1	MMP3	9606.ENSP00000327368	9606.ENSP00000299855	0	0	0	0	0	0	0	0.443	0.443
COL10A1	FUT9	9606.ENSP00000327368	9606.ENSP00000302599	0	0	0	0	0	0	0	0.464	0.464
COL10A1	COL22A1	9606.ENSP00000327368	9606.ENSP00000303153	0	0	0.25	0.753	0	0	0.9	0.243	0.91
COL10A1	ZPLD1	9606.ENSP00000327368	9606.ENSP00000307801	0	0	0	0	0	0	0	0.438	0.438
COL10A1	SOX3	9606.ENSP00000327368	9606.ENSP00000359567	0	0	0	0	0	0	0	0.403	0.403
COL10A1	NKX3-2	9606.ENSP00000327368	9606.ENSP00000371875	0	0	0	0	0	0	0	0.49	0.49
COL10A1	SPP1	9606.ENSP00000327368	9606.ENSP00000378517	0	0	0	0	0	0	0	0.513	0.513
COL10A1	COL17A1	9606.ENSP00000327368	9606.ENSP00000340937	0	0	0	0.724	0.064	0	0.9	0	0.902
COL10A1	COL25A1	9606.ENSP00000327368	9606.ENSP00000382083	0	0	0.407	0.699	0	0	0.9	0.108	0.913
COL10A1	COL2A1	9606.ENSP00000327368	9606.ENSP00000369889	0	0	0.438	0.746	0.061	0	0.9	0.911	0.932
COL10A1	COL11A1	9606.ENSP00000327368	9606.ENSP00000359114	0	0	0.422	0.772	0.201	0	0.9	0.65	0.935
COL11A1	MMP11	9606.ENSP00000359114	9606.ENSP00000215743	0	0	0	0	0.135	0	0	0.358	0.421
COL11A1	MMP13	9606.ENSP00000359114	9606.ENSP00000260302	0	0	0	0	0	0	0	0.479	0.479
COL11A1	MMP3	9606.ENSP00000359114	9606.ENSP00000299855	0	0	0	0	0	0	0	0.64	0.64
COL11A1	COL22A1	9606.ENSP00000359114	9606.ENSP00000303153	0	0	0.294	0.712	0.087	0.063	0.9	0.558	0.927
COL11A1	COL17A1	9606.ENSP00000359114	9606.ENSP00000340937	0	0	0	0.604	0.062	0	0.9	0.381	0.915
COL11A1	COL25A1	9606.ENSP00000359114	9606.ENSP00000382083	0	0	0.321	0.751	0.076	0	0.9	0.307	0.916
COL11A1	COL2A1	9606.ENSP00000359114	9606.ENSP00000369889	0	0	0.43	0.853	0.257	0	0.9	0.8	0.935
COL17A1	KRT14	9606.ENSP00000340937	9606.ENSP00000167586	0	0	0	0	0.283	0	0	0.48	0.611
COL17A1	DSG3	9606.ENSP00000340937	9606.ENSP00000257189	0	0	0	0	0.111	0	0	0.749	0.768
COL17A1	UPK3B	9606.ENSP00000340937	9606.ENSP00000257632	0	0	0	0	0	0	0	0.484	0.484
COL17A1	COL22A1	9606.ENSP00000340937	9606.ENSP00000303153	0	0	0	0.585	0	0.063	0.9	0.15	0.906
COL17A1	KRT6A	9606.ENSP00000340937	9606.ENSP00000369317	0	0	0	0	0.23	0	0	0.263	0.408
COL17A1	COL2A1	9606.ENSP00000340937	9606.ENSP00000369889	0	0	0	0.587	0.055	0	0.9	0.141	0.905
COL17A1	COL25A1	9606.ENSP00000340937	9606.ENSP00000382083	0	0	0	0.654	0	0	0.9	0.255	0.907
COL22A1	TM4SF5	9606.ENSP00000303153	9606.ENSP00000270560	0	0	0	0	0	0	0	0.431	0.431
COL22A1	COL25A1	9606.ENSP00000303153	9606.ENSP00000382083	0	0	0.206	0.72	0.061	0.063	0.9	0.041	0.908
COL22A1	COL2A1	9606.ENSP00000303153	9606.ENSP00000369889	0	0	0	0.722	0.061	0.063	0.9	0.483	0.916
COL25A1	IAPP	9606.ENSP00000382083	9606.ENSP00000240652	0	0	0	0	0	0.379	0	0.408	0.616
COL25A1	NGB	9606.ENSP00000382083	9606.ENSP00000298352	0	0	0	0	0	0	0	0.4	0.4
COL25A1	COL2A1	9606.ENSP00000382083	9606.ENSP00000369889	0	0	0.379	0.732	0.088	0	0.9	0.1	0.915
COL2A1	MMP13	9606.ENSP00000369889	9606.ENSP00000260302	0	0	0	0	0	0.379	0	0.778	0.856
COL2A1	MIA	9606.ENSP00000369889	9606.ENSP00000263369	0	0	0	0	0	0	0	0.474	0.474
COL2A1	MMP3	9606.ENSP00000369889	9606.ENSP00000299855	0	0	0	0	0	0	0	0.592	0.592
COL2A1	MMP1	9606.ENSP00000369889	9606.ENSP00000322788	0	0	0	0	0	0.379	0	0.453	0.646
COL2A1	LECT1	9606.ENSP00000369889	9606.ENSP00000367198	0	0	0	0	0.232	0	0	0.372	0.497
COL2A1	INS	9606.ENSP00000369889	9606.ENSP00000380432	0	0	0	0	0	0	0	0.415	0.415
COL2A1	TNFSF11	9606.ENSP00000369889	9606.ENSP00000381775	0	0	0	0	0	0	0	0.434	0.434
COL2A1	SPP1	9606.ENSP00000369889	9606.ENSP00000378517	0	0	0	0	0	0	0	0.58	0.58
COL2A1	NKX3-2	9606.ENSP00000369889	9606.ENSP00000371875	0	0	0	0	0.075	0.05	0	0.594	0.612
CP	SPP2	9606.ENSP00000264613	9606.ENSP00000168148	0	0	0	0	0.064	0	0.9	0.172	0.915
CP	HRG	9606.ENSP00000264613	9606.ENSP00000232003	0	0	0	0	0.063	0	0	0.408	0.421
CP	PROC	9606.ENSP00000264613	9606.ENSP00000234071	0	0	0	0	0.111	0.379	0.9	0.09	0.943
CP	VGF	9606.ENSP00000264613	9606.ENSP00000249330	0	0	0	0	0	0	0.9	0	0.9
CP	CRP	9606.ENSP00000264613	9606.ENSP00000255030	0	0	0	0	0.085	0	0	0.701	0.714
CP	GAST	9606.ENSP00000264613	9606.ENSP00000331358	0	0	0	0	0	0.379	0	0.1	0.417
CP	FGB	9606.ENSP00000264613	9606.ENSP00000306099	0	0	0	0	0.342	0	0	0.17	0.43
CP	GPX2	9606.ENSP00000264613	9606.ENSP00000374265	0	0	0	0	0.061	0	0	0.469	0.48
CP	INS	9606.ENSP00000264613	9606.ENSP00000380432	0	0	0	0	0	0	0	0.51	0.51
CP	SERPINA7	9606.ENSP00000264613	9606.ENSP00000329374	0	0	0	0	0.156	0	0	0.462	0.527
CP	GC	9606.ENSP00000264613	9606.ENSP00000421725	0	0	0	0	0.1	0	0	0.59	0.615
CP	F2	9606.ENSP00000264613	9606.ENSP00000308541	0	0	0	0	0.162	0	0	0.589	0.64
CP	IGFBP1	9606.ENSP00000264613	9606.ENSP00000275525	0	0	0	0	0.146	0	0.9	0.164	0.922
CP	SPP1	9606.ENSP00000264613	9606.ENSP00000378517	0	0	0	0	0.088	0	0.9	0.246	0.925
CP	FGA	9606.ENSP00000264613	9606.ENSP00000306361	0	0	0	0	0.396	0	0.9	0.164	0.945
CP	TF	9606.ENSP00000264613	9606.ENSP00000385834	0	0	0	0	0.181	0	0.9	0.636	0.967
CPLX2	SYT13	9606.ENSP00000352544	9606.ENSP00000020926	0	0	0	0	0.315	0	0	0.286	0.49
CPLX2	STXBP5L	9606.ENSP00000352544	9606.ENSP00000273666	0	0	0	0	0.341	0	0	0.135	0.406
CPLX2	NEUROD1	9606.ENSP00000352544	9606.ENSP00000295108	0	0	0	0	0.197	0	0	0.413	0.508
CPLX2	LGI3	9606.ENSP00000352544	9606.ENSP00000302297	0	0	0	0	0.401	0	0	0	0.4
CPLX2	RBFOX1	9606.ENSP00000352544	9606.ENSP00000309117	0	0	0	0	0.42	0	0	0	0.42
CPLX2	KIF1A	9606.ENSP00000352544	9606.ENSP00000438388	0	0	0	0	0.376	0	0	0.089	0.408
CPLX2	KCNC2	9606.ENSP00000352544	9606.ENSP00000449253	0	0	0	0	0.303	0	0	0.197	0.417
CPLX2	GABRG2	9606.ENSP00000352544	9606.ENSP00000410732	0	0	0	0	0.435	0	0	0	0.435
CPLX2	SYNPR	9606.ENSP00000352544	9606.ENSP00000418994	0	0	0	0	0.428	0	0	0.059	0.439
CPLX2	SYT12	9606.ENSP00000352544	9606.ENSP00000377520	0	0	0	0	0.093	0	0	0.411	0.443
CPLX2	TMEM59L	9606.ENSP00000352544	9606.ENSP00000470879	0	0	0	0	0.381	0	0	0.17	0.465
CPLX2	INA	9606.ENSP00000352544	9606.ENSP00000358865	0	0	0	0	0.351	0	0	0.222	0.474
CPLX2	NXPH1	9606.ENSP00000352544	9606.ENSP00000384551	0	0	0	0	0.349	0	0	0.237	0.482
CPLX2	SYT7	9606.ENSP00000352544	9606.ENSP00000444201	0	0	0	0	0.23	0	0	0.444	0.553
CPN1	HRG	9606.ENSP00000359446	9606.ENSP00000232003	0	0	0	0	0.082	0	0	0.475	0.497
CPN1	FGA	9606.ENSP00000359446	9606.ENSP00000306361	0	0	0	0	0.346	0	0	0.145	0.417
CPN1	F2	9606.ENSP00000359446	9606.ENSP00000308541	0	0	0	0	0.353	0	0	0.187	0.452
CPN1	VGLL2	9606.ENSP00000359446	9606.ENSP00000320957	0	0	0	0	0	0	0	0.4	0.4
CPS1	OTC	9606.ENSP00000402608	9606.ENSP00000039007	0	0.277	0	0	0.318	0.173	0.9	0.83	0.991
CPS1	HGD	9606.ENSP00000402608	9606.ENSP00000283871	0	0	0	0	0.144	0	0	0.471	0.528
CPS1	DPYSL5	9606.ENSP00000402608	9606.ENSP00000288699	0.075	0	0	0	0.242	0.267	0	0.131	0.493
CPS1	F2	9606.ENSP00000402608	9606.ENSP00000308541	0	0	0	0	0.267	0	0	0.222	0.405
CRABP1	STRA6	9606.ENSP00000299529	9606.ENSP00000456609	0	0	0	0	0.061	0	0	0.84	0.843
CRABP2	GPR50	9606.ENSP00000482841	9606.ENSP00000218316	0	0	0	0	0.056	0	0	0.51	0.517
CRABP2	TFAP2A	9606.ENSP00000482841	9606.ENSP00000368924	0	0	0	0	0.138	0	0	0.453	0.508
CRABP2	STRA6	9606.ENSP00000482841	9606.ENSP00000456609	0	0	0	0	0.079	0	0	0.61	0.626
CRCT1	SPRR1B	9606.ENSP00000357779	9606.ENSP00000306461	0	0	0	0	0.478	0	0	0.491	0.723
CRCT1	SPRR3	9606.ENSP00000357779	9606.ENSP00000330391	0	0	0	0	0.308	0	0	0.588	0.702
CRCT1	PGLYRP4	9606.ENSP00000357779	9606.ENSP00000352672	0	0	0	0	0.111	0	0	0.422	0.464
CRCT1	S100A7	9606.ENSP00000357779	9606.ENSP00000357712	0	0	0	0	0.285	0	0	0.206	0.408
CRCT1	SPRR2D	9606.ENSP00000357779	9606.ENSP00000357746	0	0	0	0	0.342	0	0	0.267	0.497
CRCT1	SPRR1A	9606.ENSP00000357779	9606.ENSP00000357751	0	0	0	0	0.529	0	0	0.31	0.661
CRCT1	IVL	9606.ENSP00000357779	9606.ENSP00000357753	0	0	0	0	0.337	0	0	0.441	0.613
CRCT1	SBSN	9606.ENSP00000357779	9606.ENSP00000430242	0	0	0	0	0.155	0	0	0.483	0.545
CRHR1	IAPP	9606.ENSP00000381333	9606.ENSP00000240652	0	0	0	0	0	0	0.9	0.123	0.908
CRHR1	GNGT1	9606.ENSP00000381333	9606.ENSP00000248572	0	0	0	0	0.05	0.166	0.9	0	0.913
CRHR1	NTS	9606.ENSP00000381333	9606.ENSP00000256010	0	0	0	0	0.062	0	0	0.415	0.427
CRHR1	SLC6A4	9606.ENSP00000381333	9606.ENSP00000261707	0	0	0	0	0	0	0	0.817	0.817
CRHR1	UCN2	9606.ENSP00000381333	9606.ENSP00000273610	0	0	0	0	0	0.158	0	0.862	0.879
CRHR1	SST	9606.ENSP00000381333	9606.ENSP00000287641	0	0	0	0	0.157	0	0	0.364	0.441
CRHR1	NGB	9606.ENSP00000381333	9606.ENSP00000298352	0	0	0	0	0.416	0	0	0	0.416
CRHR1	NTSR2	9606.ENSP00000381333	9606.ENSP00000303686	0	0	0	0	0.389	0	0	0.134	0.448
CRHR1	TAC1	9606.ENSP00000381333	9606.ENSP00000321106	0	0	0	0	0.169	0	0	0.654	0.7
CRHR1	HRH3	9606.ENSP00000381333	9606.ENSP00000342560	0	0	0	0	0.398	0	0	0.136	0.458
CRHR1	HTR3A	9606.ENSP00000381333	9606.ENSP00000347754	0	0	0	0	0.064	0	0	0.45	0.463
CRHR1	GIP	9606.ENSP00000381333	9606.ENSP00000350005	0	0	0	0	0	0	0.9	0.186	0.915
CRHR1	NTSR1	9606.ENSP00000381333	9606.ENSP00000359532	0	0	0	0	0.063	0	0	0.5	0.511
CRHR1	NPSR1	9606.ENSP00000381333	9606.ENSP00000370950	0	0	0	0	0.061	0	0.9	0.569	0.956
CRHR1	GNG4	9606.ENSP00000381333	9606.ENSP00000375727	0	0	0	0	0.084	0.166	0.9	0	0.916
CRHR1	INS	9606.ENSP00000381333	9606.ENSP00000380432	0	0	0	0	0	0	0	0.4	0.4
CRHR1	SYNPR	9606.ENSP00000381333	9606.ENSP00000418994	0	0	0	0	0.384	0	0	0.138	0.446
CRHR1	SLC2A1	9606.ENSP00000381333	9606.ENSP00000416293	0	0	0	0	0	0	0	0.475	0.475
CRHR1	NPY	9606.ENSP00000381333	9606.ENSP00000384364	0	0	0	0	0.134	0	0	0.587	0.627
CRHR1	GCGR	9606.ENSP00000381333	9606.ENSP00000383558	0	0	0	0.746	0	0	0.9	0.569	0.913
CRHR1	GCG	9606.ENSP00000381333	9606.ENSP00000387662	0	0	0	0	0	0	0.9	0.416	0.939
CRISP1	HOXC13	9606.ENSP00000338276	9606.ENSP00000243056	0	0	0	0	0	0	0	0.491	0.491
CRISP1	KRT75	9606.ENSP00000338276	9606.ENSP00000252245	0	0	0	0	0.088	0	0	0.429	0.457
CRISP1	FETUB	9606.ENSP00000338276	9606.ENSP00000265029	0	0	0	0	0	0	0	0.625	0.625
CRISP1	DEFB126	9606.ENSP00000338276	9606.ENSP00000371835	0	0	0	0	0.072	0	0	0.549	0.564
CRISP1	DSG4	9606.ENSP00000338276	9606.ENSP00000352785	0	0	0	0	0	0	0	0.661	0.661
CRLF1	LCT	9606.ENSP00000376188	9606.ENSP00000264162	0	0	0	0	0	0	0	0.543	0.543
CRP	LBP	9606.ENSP00000255030	9606.ENSP00000217407	0	0	0	0	0.153	0	0	0.67	0.708
CRP	CSF3	9606.ENSP00000255030	9606.ENSP00000225474	0	0	0	0	0	0	0	0.629	0.629
CRP	FGF21	9606.ENSP00000255030	9606.ENSP00000471477	0	0	0	0	0.067	0	0	0.404	0.42
CRP	IL36G	9606.ENSP00000255030	9606.ENSP00000259205	0	0	0	0	0	0	0	0.426	0.426
CRP	FGB	9606.ENSP00000255030	9606.ENSP00000306099	0	0	0	0	0.227	0	0	0.293	0.431
CRP	FCN3	9606.ENSP00000255030	9606.ENSP00000270879	0	0	0	0	0.076	0	0	0.429	0.449
CRP	IL37	9606.ENSP00000255030	9606.ENSP00000263326	0	0	0	0	0.063	0	0	0.44	0.453
CRP	IGFBP1	9606.ENSP00000255030	9606.ENSP00000275525	0	0	0	0	0.063	0	0	0.444	0.456
CRP	FABP4	9606.ENSP00000255030	9606.ENSP00000256104	0	0	0	0	0.052	0	0	0.473	0.479
CRP	SPP1	9606.ENSP00000255030	9606.ENSP00000378517	0	0	0	0	0	0	0	0.515	0.515
CRP	MMP10	9606.ENSP00000255030	9606.ENSP00000279441	0	0	0	0	0	0	0	0.525	0.526
CRP	IL36RN	9606.ENSP00000255030	9606.ENSP00000376896	0	0	0	0	0.062	0	0	0.518	0.528
CRP	HNF1A	9606.ENSP00000255030	9606.ENSP00000257555	0	0	0	0	0.062	0	0	0.53	0.541
CRP	ENTPD8	9606.ENSP00000255030	9606.ENSP00000360561	0	0	0	0	0.064	0	0	0.545	0.555
CRP	GCG	9606.ENSP00000255030	9606.ENSP00000387662	0	0	0	0	0	0	0	0.558	0.558
CRP	GC	9606.ENSP00000255030	9606.ENSP00000421725	0	0	0	0	0.231	0	0	0.517	0.612
CRP	MMP3	9606.ENSP00000255030	9606.ENSP00000299855	0	0	0	0	0	0	0	0.656	0.656
CRP	UGT3A1	9606.ENSP00000255030	9606.ENSP00000274278	0	0	0	0	0.672	0	0	0.057	0.677
CRP	TNFSF11	9606.ENSP00000255030	9606.ENSP00000381775	0	0	0	0	0	0	0	0.703	0.703
CRP	MMP1	9606.ENSP00000255030	9606.ENSP00000322788	0	0	0	0	0.052	0	0	0.724	0.727
CRP	F2	9606.ENSP00000255030	9606.ENSP00000308541	0	0	0	0	0.15	0	0	0.789	0.813
CRP	INS	9606.ENSP00000255030	9606.ENSP00000380432	0	0	0	0	0.063	0	0	0.921	0.922
CRYBA2	LGSN	9606.ENSP00000295728	9606.ENSP00000359691	0	0	0	0	0.079	0	0	0.409	0.432
CRYBA2	GCG	9606.ENSP00000295728	9606.ENSP00000387662	0	0	0	0	0.335	0	0	0.191	0.439
CRYBA2	GABRG2	9606.ENSP00000295728	9606.ENSP00000410732	0	0	0	0	0	0	0	0.505	0.505
CRYBA2	MUC13	9606.ENSP00000295728	9606.ENSP00000485028	0	0	0	0	0.081	0	0	0.486	0.507
CRYBA2	TM4SF4	9606.ENSP00000295728	9606.ENSP00000305852	0	0	0	0	0.139	0	0	0.455	0.511
CSAG1	MAGEC1	9606.ENSP00000359310	9606.ENSP00000285879	0	0	0	0	0.337	0	0	0.269	0.494
CSAG1	PAGE5	9606.ENSP00000359310	9606.ENSP00000289619	0	0	0	0	0.14	0	0	0.421	0.48
CSAG1	SAGE1	9606.ENSP00000359310	9606.ENSP00000323191	0	0	0	0	0.195	0	0	0.292	0.405
CSAG1	MAGEA11	9606.ENSP00000359310	9606.ENSP00000347358	0	0	0	0	0.213	0	0	0.546	0.627
CSAG1	MAGEA1	9606.ENSP00000359310	9606.ENSP00000349085	0	0	0	0	0.44	0	0	0.573	0.75
CSAG1	MAGEA4	9606.ENSP00000359310	9606.ENSP00000353379	0	0	0	0	0.175	0	0	0.401	0.484
CSAG1	MAGEC2	9606.ENSP00000359310	9606.ENSP00000354660	0	0	0	0	0.355	0	0	0.159	0.434
CSAG1	FMR1NB	9606.ENSP00000359310	9606.ENSP00000359498	0	0	0	0	0.064	0	0	0.402	0.416
CSAG1	GAGE1	9606.ENSP00000359310	9606.ENSP00000484668	0	0	0	0	0.173	0	0	0.354	0.442
CSAG1	XAGE1A	9606.ENSP00000359310	9606.ENSP00000364752	0	0	0	0	0.116	0	0	0.398	0.445
CSAG1	CT83	9606.ENSP00000359310	9606.ENSP00000360961	0	0	0	0	0.14	0	0	0.419	0.478
CSAG1	MAGEB16	9606.ENSP00000359310	9606.ENSP00000382871	0	0	0	0	0.152	0	0	0.562	0.613
CSAG1	PRAME	9606.ENSP00000359310	9606.ENSP00000445675	0	0	0	0	0.334	0	0	0.477	0.636
CSAG1	MAGEA8	9606.ENSP00000359310	9606.ENSP00000438293	0	0	0	0	0.068	0	0	0.676	0.685
CSAG1	PASD1	9606.ENSP00000359310	9606.ENSP00000359382	0	0	0	0	0.3	0	0	0.59	0.7
CSAG1	MAGEA6	9606.ENSP00000359310	9606.ENSP00000480637	0	0	0	0	0.7	0	0	0.625	0.882
CSAG1	MAGEA3	9606.ENSP00000359310	9606.ENSP00000473093	0	0	0	0	0.771	0	0	0.584	0.9
CSAG1	MAGEA12	9606.ENSP00000359310	9606.ENSP00000377478	0	0	0	0	0.771	0	0	0.662	0.919
CSF3	OLFM4	9606.ENSP00000225474	9606.ENSP00000219022	0	0	0	0	0	0	0	0.544	0.544
CSF3	RASGEF1C	9606.ENSP00000225474	9606.ENSP00000377037	0	0	0	0	0	0	0	0.405	0.405
CSF3	TNFSF11	9606.ENSP00000225474	9606.ENSP00000381775	0	0	0	0	0	0	0	0.425	0.425
CSF3	MMP3	9606.ENSP00000225474	9606.ENSP00000299855	0	0	0	0	0.098	0	0	0.411	0.446
CSF3	IL31RA	9606.ENSP00000225474	9606.ENSP00000415900	0	0	0	0	0	0	0	0.469	0.469
CSF3	SPP1	9606.ENSP00000225474	9606.ENSP00000378517	0	0	0	0	0	0	0	0.473	0.473
CSF3	INS	9606.ENSP00000225474	9606.ENSP00000380432	0	0	0	0	0	0	0	0.564	0.564
CSF3	IL20RB	9606.ENSP00000225474	9606.ENSP00000328133	0	0	0	0	0	0	0.6	0.079	0.615
CSF3	IL22RA2	9606.ENSP00000225474	9606.ENSP00000296980	0	0	0	0	0	0	0.6	0.089	0.62
CST1	CST4	9606.ENSP00000305731	9606.ENSP00000217423	0	0	0	0.98	0.381	0.817	0	0.838	0.883
CST4	MUC5B	9606.ENSP00000217423	9606.ENSP00000436812	0	0	0	0	0	0	0	0.526	0.526
CT83	MAGEC1	9606.ENSP00000360961	9606.ENSP00000285879	0	0	0	0	0.139	0	0	0.352	0.418
CT83	MAGEA1	9606.ENSP00000360961	9606.ENSP00000349085	0	0	0	0	0.192	0	0	0.53	0.604
CT83	PLAC1	9606.ENSP00000360961	9606.ENSP00000352173	0	0	0	0	0.069	0	0	0.417	0.434
CT83	MAGEA4	9606.ENSP00000360961	9606.ENSP00000353379	0	0	0	0	0.076	0	0	0.473	0.492
CT83	HORMAD1	9606.ENSP00000360961	9606.ENSP00000355167	0	0	0	0	0.064	0	0	0.472	0.484
CT83	SLCO6A1	9606.ENSP00000360961	9606.ENSP00000421339	0	0	0	0	0	0	0	0.47	0.47
CT83	MAGEA3	9606.ENSP00000360961	9606.ENSP00000473093	0	0	0	0	0.207	0	0	0.477	0.567
CTAG2	ENSG00000267978	9606.ENSP00000247306	9606.ENSP00000243314	0	0	0	0	0	0	0	0.588	0.588
CTAG2	MAGEA10	9606.ENSP00000247306	9606.ENSP00000244096	0	0	0	0	0	0	0	0.671	0.671
CTAG2	MAGEB2	9606.ENSP00000247306	9606.ENSP00000368273	0	0	0	0	0.088	0	0	0.429	0.456
CTAG2	FMR1NB	9606.ENSP00000247306	9606.ENSP00000359498	0	0	0	0	0	0	0	0.474	0.474
CTAG2	SPANXC	9606.ENSP00000247306	9606.ENSP00000351884	0	0	0	0	0	0	0	0.492	0.491
CTAG2	MAGEB1	9606.ENSP00000247306	9606.ENSP00000368264	0	0	0	0	0.063	0	0	0.498	0.509
CTAG2	SPANXD	9606.ENSP00000247306	9606.ENSP00000359546	0	0	0	0	0	0	0	0.54	0.54
CTAG2	XAGE1A	9606.ENSP00000247306	9606.ENSP00000364752	0	0	0	0	0.069	0	0	0.541	0.554
CTAG2	PRAME	9606.ENSP00000247306	9606.ENSP00000445675	0	0	0	0	0.076	0	0	0.542	0.558
CTAG2	PASD1	9606.ENSP00000247306	9606.ENSP00000359382	0	0	0	0	0.076	0	0	0.553	0.569
CTAG2	GAGE1	9606.ENSP00000247306	9606.ENSP00000484668	0	0	0	0	0.074	0	0	0.556	0.571
CTAG2	GAGE2A	9606.ENSP00000247306	9606.ENSP00000355421	0	0	0	0	0.125	0	0	0.53	0.571
CTAG2	MAGEA12	9606.ENSP00000247306	9606.ENSP00000377478	0	0	0	0	0.14	0	0	0.558	0.603
CTAG2	MAGEA9	9606.ENSP00000247306	9606.ENSP00000471017	0	0	0	0	0.088	0	0	0.588	0.608
CTAG2	MAGEC2	9606.ENSP00000247306	9606.ENSP00000354660	0	0	0	0	0.098	0	0	0.63	0.651
CTAG2	SSX1	9606.ENSP00000247306	9606.ENSP00000366118	0	0	0	0	0	0	0	0.67	0.67
CTAG2	MAGEC1	9606.ENSP00000247306	9606.ENSP00000285879	0	0	0	0	0.094	0	0	0.704	0.72
CTAG2	MAGEA4	9606.ENSP00000247306	9606.ENSP00000353379	0	0	0	0	0.098	0	0	0.704	0.721
CTAG2	MAGEA6	9606.ENSP00000247306	9606.ENSP00000480637	0	0	0	0	0.143	0	0	0.714	0.744
CTAG2	MAGEA3	9606.ENSP00000247306	9606.ENSP00000473093	0	0	0	0	0.139	0	0	0.725	0.753
CTAG2	MAGEA1	9606.ENSP00000247306	9606.ENSP00000349085	0	0	0	0	0.152	0	0	0.725	0.756
CTCFL	DNMT3A	9606.ENSP00000415579	9606.ENSP00000264709	0	0	0	0	0	0	0	0.427	0.427
CTCFL	MYCN	9606.ENSP00000415579	9606.ENSP00000281043	0	0	0	0	0	0.059	0	0.415	0.426
CTCFL	MAGEA1	9606.ENSP00000415579	9606.ENSP00000349085	0	0	0	0	0	0	0	0.473	0.473
CTHRC1	WNT3A	9606.ENSP00000330523	9606.ENSP00000284523	0	0	0	0	0	0	0.9	0.415	0.938
CYP11B1	FOXL2	9606.ENSP00000292427	9606.ENSP00000333188	0	0	0	0	0.051	0.064	0	0.39	0.41
CYP11B1	DMRT1	9606.ENSP00000292427	9606.ENSP00000371711	0	0	0	0	0	0	0	0.461	0.461
CYP11B1	NR0B1	9606.ENSP00000292427	9606.ENSP00000368253	0	0	0	0	0.061	0.085	0	0.573	0.601
CYP11B1	HSD3B2	9606.ENSP00000292427	9606.ENSP00000445122	0	0	0	0	0.062	0.132	0.9	0.781	0.979
CYP1A2	UGT2A3	9606.ENSP00000342007	9606.ENSP00000251566	0	0	0	0	0.061	0	0.65	0.479	0.813
CYP1A2	SLCO1B1	9606.ENSP00000342007	9606.ENSP00000256958	0	0	0	0	0.061	0	0	0.581	0.589
CYP1A2	SLCO1B3	9606.ENSP00000342007	9606.ENSP00000261196	0	0	0	0	0.061	0	0	0.475	0.485
CYP1A2	SLC6A4	9606.ENSP00000342007	9606.ENSP00000261707	0	0	0	0	0	0	0	0.407	0.407
CYP1A2	UGT2B10	9606.ENSP00000342007	9606.ENSP00000265403	0	0	0	0	0.061	0	0.65	0.219	0.721
CYP1A2	UGT1A6	9606.ENSP00000342007	9606.ENSP00000303174	0	0	0	0	0.063	0	0.65	0.75	0.911
CYP1A2	UGT1A8	9606.ENSP00000342007	9606.ENSP00000304845	0	0	0	0	0.063	0	0.65	0.735	0.905
CYP1A2	CYP2B6	9606.ENSP00000342007	9606.ENSP00000324648	0	0	0.439	0.767	0.068	0	0.9	0.92	0.93
CYP1A2	UGT2B28	9606.ENSP00000342007	9606.ENSP00000334276	0	0	0	0	0.061	0	0.65	0.135	0.69
CYP1A2	UGT2B15	9606.ENSP00000342007	9606.ENSP00000341045	0	0	0	0	0.061	0	0.65	0.431	0.796
CYP1A2	NLRP5	9606.ENSP00000342007	9606.ENSP00000375063	0	0	0	0	0	0	0	0.416	0.416
CYP1A2	INS	9606.ENSP00000342007	9606.ENSP00000380432	0	0	0	0	0	0	0	0.618	0.618
CYP1A2	PLA2G2F	9606.ENSP00000342007	9606.ENSP00000364243	0	0	0	0	0	0	0.65	0.064	0.658
CYP1A2	UGT2B11	9606.ENSP00000342007	9606.ENSP00000387683	0	0	0	0	0.061	0	0.65	0.193	0.711
CYP1A2	UGT1A10	9606.ENSP00000342007	9606.ENSP00000343838	0	0	0	0	0.063	0	0.65	0.572	0.847
CYP1A2	UGT1A7	9606.ENSP00000342007	9606.ENSP00000362525	0	0	0	0	0.063	0	0.65	0.579	0.85
CYP1A2	UGT1A3	9606.ENSP00000342007	9606.ENSP00000418532	0	0	0	0	0.063	0	0.65	0.623	0.865
CYP1A2	XDH	9606.ENSP00000342007	9606.ENSP00000368727	0	0	0	0	0.061	0	0.9	0.096	0.907
CYP1A2	UGT1A1	9606.ENSP00000342007	9606.ENSP00000362549	0	0	0	0	0.093	0	0.65	0.735	0.908
CYP1A2	HSD3B2	9606.ENSP00000342007	9606.ENSP00000445122	0	0	0	0	0	0.132	0.9	0.216	0.926
CYP24A1	SPP1	9606.ENSP00000216862	9606.ENSP00000378517	0	0	0	0	0.061	0	0	0.435	0.446
CYP24A1	GC	9606.ENSP00000216862	9606.ENSP00000421725	0	0	0	0	0.061	0	0	0.79	0.795
CYP2B6	UGT2A3	9606.ENSP00000324648	9606.ENSP00000251566	0	0	0	0	0.064	0	0.65	0.462	0.808
CYP2B6	G6PC	9606.ENSP00000324648	9606.ENSP00000253801	0	0	0	0	0.081	0	0	0.546	0.565
CYP2B6	SLCO1B1	9606.ENSP00000324648	9606.ENSP00000256958	0	0	0	0	0.064	0	0	0.642	0.65
CYP2B6	SLCO1B3	9606.ENSP00000324648	9606.ENSP00000261196	0	0	0	0	0.064	0	0	0.49	0.502
CYP2B6	UGT2B10	9606.ENSP00000324648	9606.ENSP00000265403	0	0	0	0	0.064	0	0.65	0.369	0.775
CYP2B6	STRA8	9606.ENSP00000324648	9606.ENSP00000275764	0	0	0	0	0	0	0	0.415	0.414
CYP2B6	PTPRN	9606.ENSP00000324648	9606.ENSP00000295718	0	0	0	0	0	0	0	0.457	0.457
CYP2B6	UGT1A6	9606.ENSP00000324648	9606.ENSP00000303174	0	0	0	0	0.109	0	0.65	0.751	0.915
CYP2B6	UGT1A8	9606.ENSP00000324648	9606.ENSP00000304845	0	0	0	0	0.128	0	0.65	0.752	0.917
CYP2B6	INSM1	9606.ENSP00000324648	9606.ENSP00000312631	0	0	0	0	0	0	0	0.577	0.577
CYP2B6	INS	9606.ENSP00000324648	9606.ENSP00000380432	0	0	0	0	0	0	0	0.515	0.515
CYP2B6	PLA2G2F	9606.ENSP00000324648	9606.ENSP00000364243	0	0	0	0	0	0	0.65	0.057	0.655
CYP2B6	UGT2B11	9606.ENSP00000324648	9606.ENSP00000387683	0	0	0	0	0.064	0	0.65	0.256	0.735
CYP2B6	UGT2B28	9606.ENSP00000324648	9606.ENSP00000334276	0	0	0	0	0.064	0	0.65	0.295	0.749
CYP2B6	UGT2B15	9606.ENSP00000324648	9606.ENSP00000341045	0	0	0	0	0.091	0	0.65	0.439	0.806
CYP2B6	UGT1A7	9606.ENSP00000324648	9606.ENSP00000362525	0	0	0	0	0.109	0	0.65	0.677	0.89
CYP2B6	UGT1A10	9606.ENSP00000324648	9606.ENSP00000343838	0	0	0	0	0.109	0	0.65	0.677	0.89
CYP2B6	UGT1A3	9606.ENSP00000324648	9606.ENSP00000418532	0	0	0	0	0.132	0	0.65	0.699	0.9
CYP2B6	UGT1A1	9606.ENSP00000324648	9606.ENSP00000362549	0	0	0	0	0.141	0	0.65	0.733	0.912
CYP2B6	CYP4F8	9606.ENSP00000324648	9606.ENSP00000477567	0	0	0.443	0.593	0.062	0	0.9	0.533	0.935
CYP4F8	UGT2B28	9606.ENSP00000477567	9606.ENSP00000334276	0	0	0	0	0.084	0	0	0.449	0.474
CYP4F8	PLA2G2F	9606.ENSP00000477567	9606.ENSP00000364243	0	0	0	0	0	0	0.65	0.085	0.666
DEFA5	OLFM4	9606.ENSP00000329890	9606.ENSP00000219022	0	0	0	0	0.199	0	0	0.283	0.401
DEFA5	REG1A	9606.ENSP00000329890	9606.ENSP00000233735	0	0	0	0	0.358	0	0	0.349	0.564
DEFA5	MUC17	9606.ENSP00000329890	9606.ENSP00000302716	0	0	0	0	0.215	0	0	0.354	0.471
DEFA5	REG1B	9606.ENSP00000329890	9606.ENSP00000303206	0	0	0	0	0.333	0	0	0.253	0.48
DEFA5	MUC13	9606.ENSP00000329890	9606.ENSP00000485028	0	0	0	0	0.15	0	0	0.352	0.425
DEFA5	PHGR1	9606.ENSP00000329890	9606.ENSP00000410024	0	0	0	0	0.49	0	0	0	0.489
DEFA5	REG3A	9606.ENSP00000329890	9606.ENSP00000377456	0	0	0	0	0.5	0	0	0.536	0.758
DEFA5	PRSS3P2	9606.ENSP00000329890	9606.ENSP00000485444	0	0	0	0	0	0	0.9	0	0.9
DEFA5	PRSS3	9606.ENSP00000329890	9606.ENSP00000354280	0	0	0	0	0.076	0	0.9	0	0.903
DEFA5	DEFB126	9606.ENSP00000329890	9606.ENSP00000371835	0	0	0	0	0	0	0.9	0.299	0.926
DEFB126	SPAG11B	9606.ENSP00000371835	9606.ENSP00000381480	0	0	0	0	0.063	0	0	0.597	0.607
DEPDC1	MYBL2	9606.ENSP00000412292	9606.ENSP00000217026	0	0	0	0	0.348	0	0	0.246	0.488
DEPDC1	DLGAP5	9606.ENSP00000412292	9606.ENSP00000247191	0	0	0	0	0.923	0	0	0.338	0.947
DEPDC1	TROAP	9606.ENSP00000412292	9606.ENSP00000257909	0	0	0	0	0.562	0	0	0	0.562
DEPDC1	IGF2BP3	9606.ENSP00000412292	9606.ENSP00000258729	0	0	0	0	0.171	0	0	0.317	0.409
DEPDC1	NEIL3	9606.ENSP00000412292	9606.ENSP00000264596	0	0	0	0	0.692	0	0	0.181	0.737
DEPDC1	DEPDC1B	9606.ENSP00000412292	9606.ENSP00000265036	0	0	0	0.918	0.594	0	0	0.783	0.619
DEPDC1	NUF2	9606.ENSP00000412292	9606.ENSP00000271452	0	0	0	0	0.645	0	0	0.51	0.819
DEPDC1	LY6K	9606.ENSP00000412292	9606.ENSP00000292430	0	0	0	0	0	0	0	0.557	0.557
DEPDC1	MELK	9606.ENSP00000412292	9606.ENSP00000298048	0	0	0	0	0.731	0	0	0.23	0.784
DEPDC1	TPX2	9606.ENSP00000412292	9606.ENSP00000300403	0	0	0	0	0.716	0	0	0.164	0.752
DEPDC1	UBE2C	9606.ENSP00000412292	9606.ENSP00000348838	0	0	0	0	0.673	0	0	0.294	0.759
DEPDC1	EXO1	9606.ENSP00000412292	9606.ENSP00000355506	0	0	0	0	0.675	0	0	0.101	0.695
DEPDC1	NEK2	9606.ENSP00000412292	9606.ENSP00000355966	0	0	0	0	0.876	0	0	0.237	0.902
DEPDC1	KIF14	9606.ENSP00000412292	9606.ENSP00000356319	0	0	0	0	0.787	0	0	0.314	0.848
DEPDC1	KIF2C	9606.ENSP00000412292	9606.ENSP00000361298	0	0	0	0	0.793	0	0	0.212	0.83
DEPDC1	KIF4A	9606.ENSP00000412292	9606.ENSP00000363524	0	0	0	0	0.727	0	0	0.265	0.79
DEPDC1	TOP2A	9606.ENSP00000412292	9606.ENSP00000411532	0	0	0	0	0.94	0	0	0.158	0.947
DEPDC1	KIF18B	9606.ENSP00000412292	9606.ENSP00000465992	0	0	0	0	0.446	0	0	0.058	0.455
DEPDC1	MCM10	9606.ENSP00000412292	9606.ENSP00000418268	0	0	0	0	0.679	0	0	0.063	0.687
DEPDC1	HJURP	9606.ENSP00000412292	9606.ENSP00000414109	0	0	0	0	0.816	0	0	0.041	0.816
DEPDC1B	RHOV	9606.ENSP00000265036	9606.ENSP00000220507	0	0	0	0	0	0	0.9	0.041	0.9
DEPDC1B	DLGAP5	9606.ENSP00000265036	9606.ENSP00000247191	0	0	0	0	0.733	0	0	0.094	0.748
DEPDC1B	NEIL3	9606.ENSP00000265036	9606.ENSP00000264596	0	0	0	0	0.359	0	0	0.193	0.46
DEPDC1B	KIF4A	9606.ENSP00000265036	9606.ENSP00000363524	0	0	0	0	0.454	0	0	0	0.454
DEPDC1B	NEK2	9606.ENSP00000265036	9606.ENSP00000355966	0	0	0	0	0.448	0	0	0.058	0.457
DEPDC1B	EXO1	9606.ENSP00000265036	9606.ENSP00000355506	0	0	0	0	0.571	0	0	0.042	0.572
DEPDC1B	TPX2	9606.ENSP00000265036	9606.ENSP00000300403	0	0	0	0	0.587	0	0	0	0.587
DEPDC1B	NUF2	9606.ENSP00000265036	9606.ENSP00000271452	0	0	0	0	0.589	0	0	0	0.589
DEPDC1B	UBE2C	9606.ENSP00000265036	9606.ENSP00000348838	0	0	0	0	0.561	0	0	0.107	0.591
DEPDC1B	NKAIN1	9606.ENSP00000265036	9606.ENSP00000362841	0	0	0	0	0.06	0	0	0.584	0.592
DEPDC1B	HJURP	9606.ENSP00000265036	9606.ENSP00000414109	0	0	0	0	0.599	0	0	0	0.599
DEPDC1B	MELK	9606.ENSP00000265036	9606.ENSP00000298048	0	0	0	0	0.6	0	0	0	0.6
DEPDC1B	KIF14	9606.ENSP00000265036	9606.ENSP00000356319	0	0	0	0	0.509	0	0	0.22	0.601
DEPDC1B	TOP2A	9606.ENSP00000265036	9606.ENSP00000411532	0	0	0	0	0.618	0	0	0	0.618
DEPDC1B	MCM10	9606.ENSP00000265036	9606.ENSP00000418268	0	0	0	0	0.56	0	0	0.262	0.662
DEPDC1B	KIF2C	9606.ENSP00000265036	9606.ENSP00000361298	0	0	0	0	0.658	0	0	0.151	0.697
DKK4	WNT16	9606.ENSP00000220812	9606.ENSP00000222462	0	0	0	0	0	0.093	0	0.371	0.405
DKK4	SOSTDC1	9606.ENSP00000220812	9606.ENSP00000304930	0	0	0	0	0	0	0	0.538	0.538
DKK4	SOX14	9606.ENSP00000220812	9606.ENSP00000305343	0	0	0	0	0	0	0	0.582	0.582
DKK4	WNT3A	9606.ENSP00000220812	9606.ENSP00000284523	0	0	0	0	0	0.093	0.9	0.441	0.944
DLGAP5	MYBL2	9606.ENSP00000247191	9606.ENSP00000217026	0	0	0	0	0.553	0	0	0.205	0.63
DLGAP5	IQGAP3	9606.ENSP00000247191	9606.ENSP00000354451	0	0	0	0	0.472	0.08	0	0.154	0.553
DLGAP5	FABP7	9606.ENSP00000247191	9606.ENSP00000357429	0	0	0	0	0	0	0	0.627	0.627
DLGAP5	NEIL3	9606.ENSP00000247191	9606.ENSP00000264596	0	0	0	0	0.783	0	0	0.056	0.787
DLGAP5	EXO1	9606.ENSP00000247191	9606.ENSP00000355506	0	0	0	0	0.823	0	0	0.136	0.841
DLGAP5	KIF18B	9606.ENSP00000247191	9606.ENSP00000465992	0	0	0	0	0.803	0.056	0	0.254	0.849
DLGAP5	TROAP	9606.ENSP00000247191	9606.ENSP00000257909	0	0	0	0	0.804	0	0	0.271	0.851
DLGAP5	MCM10	9606.ENSP00000247191	9606.ENSP00000418268	0	0	0	0	0.81	0	0	0.403	0.882
DLGAP5	KIF14	9606.ENSP00000247191	9606.ENSP00000356319	0	0	0	0	0.847	0.056	0	0.45	0.913
DLGAP5	HJURP	9606.ENSP00000247191	9606.ENSP00000414109	0	0	0	0	0.894	0	0	0.389	0.932
DLGAP5	KIF2C	9606.ENSP00000247191	9606.ENSP00000361298	0	0	0	0	0.903	0.082	0	0.545	0.956
DLGAP5	NEK2	9606.ENSP00000247191	9606.ENSP00000355966	0	0	0	0	0.934	0	0	0.4	0.959
DLGAP5	KIF4A	9606.ENSP00000247191	9606.ENSP00000363524	0	0	0	0	0.939	0.056	0	0.427	0.964
DLGAP5	MELK	9606.ENSP00000247191	9606.ENSP00000298048	0	0	0	0	0.943	0	0	0.44	0.966
DLGAP5	NUF2	9606.ENSP00000247191	9606.ENSP00000271452	0	0	0	0	0.94	0	0	0.541	0.971
DLGAP5	UBE2C	9606.ENSP00000247191	9606.ENSP00000348838	0	0	0	0	0.969	0.058	0	0.388	0.98
DLGAP5	TOP2A	9606.ENSP00000247191	9606.ENSP00000411532	0	0	0	0	0.979	0	0	0.425	0.987
DLGAP5	TPX2	9606.ENSP00000247191	9606.ENSP00000300403	0	0	0	0	0.965	0	0	0.79	0.992
DLK1	FABP4	9606.ENSP00000340292	9606.ENSP00000256104	0	0	0	0	0	0	0	0.555	0.555
DLK1	DNMT3A	9606.ENSP00000340292	9606.ENSP00000264709	0	0	0	0	0	0	0	0.45	0.45
DLK1	IGFBP1	9606.ENSP00000340292	9606.ENSP00000275525	0	0	0	0	0.252	0	0	0.255	0.418
DLK1	INS	9606.ENSP00000340292	9606.ENSP00000380432	0	0	0	0	0.068	0	0	0.505	0.518
DLK1	RTL1	9606.ENSP00000340292	9606.ENSP00000435342	0	0	0	0	0.083	0	0	0.825	0.833
DLX6	LHX8	9606.ENSP00000428480	9606.ENSP00000294638	0	0	0	0	0.059	0.078	0	0.455	0.486
DLX6	GAD1	9606.ENSP00000428480	9606.ENSP00000350928	0	0	0	0	0.063	0	0	0.451	0.464
DLX6	NKX3-2	9606.ENSP00000428480	9606.ENSP00000371875	0	0	0	0.617	0.049	0.084	0.9	0.448	0.92
DLX6	IRX4	9606.ENSP00000428480	9606.ENSP00000482393	0	0	0	0	0	0.333	0	0.207	0.448
DMBX1	USH1C	9606.ENSP00000353132	9606.ENSP00000005226	0	0	0	0	0	0	0	0.507	0.507
DMBX1	OTX2	9606.ENSP00000353132	9606.ENSP00000343819	0	0	0	0.682	0.078	0.522	0	0.692	0.639
DMBX1	FOXH1	9606.ENSP00000353132	9606.ENSP00000366534	0	0	0	0	0	0.124	0	0.349	0.405
DMRT1	HNF1A	9606.ENSP00000371711	9606.ENSP00000257555	0	0	0	0	0	0	0	0.51	0.51
DMRT1	STRA8	9606.ENSP00000371711	9606.ENSP00000275764	0	0	0	0	0.102	0	0	0.783	0.797
DMRT1	TERT	9606.ENSP00000371711	9606.ENSP00000309572	0	0	0	0	0	0	0	0.433	0.433
DMRT1	FOXL2	9606.ENSP00000371711	9606.ENSP00000333188	0	0	0	0	0	0.05	0	0.887	0.888
DMRT1	SOX3	9606.ENSP00000371711	9606.ENSP00000359567	0	0	0	0	0.061	0.102	0	0.746	0.767
DMRT1	NR0B1	9606.ENSP00000371711	9606.ENSP00000368253	0	0	0	0	0.064	0.064	0	0.713	0.727
DMRT1	SOHLH2	9606.ENSP00000371711	9606.ENSP00000369210	0	0	0	0	0.064	0	0	0.522	0.533
DMRT1	HSD3B2	9606.ENSP00000371711	9606.ENSP00000445122	0	0	0	0	0	0	0	0.441	0.441
DMRT1	SOHLH1	9606.ENSP00000371711	9606.ENSP00000404438	0	0	0	0	0.062	0	0	0.725	0.731
DMRTA2	LHX2	9606.ENSP00000383909	9606.ENSP00000362717	0	0	0	0	0.117	0.05	0	0.373	0.428
DMRTC2	NLRP13	9606.ENSP00000269945	9606.ENSP00000343891	0	0	0	0	0.065	0	0	0.417	0.432
DMRTC2	SOHLH2	9606.ENSP00000269945	9606.ENSP00000369210	0	0	0	0	0.061	0	0	0.42	0.432
DNAJC12	RASAL1	9606.ENSP00000225171	9606.ENSP00000450244	0	0	0	0	0	0	0	0.421	0.421
DNAJC12	PAH	9606.ENSP00000225171	9606.ENSP00000448059	0	0	0	0	0.114	0.05	0	0.41	0.46
DNAJC12	DNAJC22	9606.ENSP00000225171	9606.ENSP00000446830	0.043	0	0	0	0.051	0.08	0	0.536	0.561
DNAJC22	HNF4G	9606.ENSP00000446830	9606.ENSP00000379701	0	0	0	0	0.09	0	0	0.462	0.489
DNMT3A	PIWIL1	9606.ENSP00000264709	9606.ENSP00000245255	0	0	0	0	0	0	0	0.472	0.472
DNMT3A	NKX2-2	9606.ENSP00000264709	9606.ENSP00000366347	0	0	0	0	0	0	0	0.507	0.507
DNMT3A	PADI4	9606.ENSP00000264709	9606.ENSP00000364597	0	0	0	0	0	0	0	0.526	0.526
DNMT3A	HMGA2	9606.ENSP00000264709	9606.ENSP00000437621	0	0	0	0	0	0	0	0.569	0.569
DNMT3A	SALL3	9606.ENSP00000264709	9606.ENSP00000441823	0	0	0	0	0.065	0.379	0	0.543	0.711
DPPA2	FGF4	9606.ENSP00000417710	9606.ENSP00000168712	0	0	0	0	0.119	0	0	0.374	0.425
DPPA2	DPPA5	9606.ENSP00000417710	9606.ENSP00000359396	0	0	0	0	0.12	0	0	0.601	0.634
DPPA2	LIN28A	9606.ENSP00000417710	9606.ENSP00000363314	0	0	0	0	0.118	0	0	0.547	0.584
DPPA5	FGF4	9606.ENSP00000359396	9606.ENSP00000168712	0	0	0	0	0.098	0	0	0.413	0.448
DPPA5	LIN28A	9606.ENSP00000359396	9606.ENSP00000363314	0	0	0	0	0.064	0	0	0.698	0.705
DPYSL5	ZIC1	9606.ENSP00000288699	9606.ENSP00000282928	0	0	0	0	0.152	0	0	0.453	0.516
DPYSL5	SOX1	9606.ENSP00000288699	9606.ENSP00000330218	0	0	0	0	0.14	0	0	0.541	0.588
DPYSL5	ZIC4	9606.ENSP00000288699	9606.ENSP00000435509	0	0	0	0	0.136	0	0	0.733	0.759
DSCR4	DSCR8	9606.ENSP00000328676	9606.ENSP00000350336	0	0	0	0	0.335	0	0	0.84	0.889
DSCR8	FOXE1	9606.ENSP00000350336	9606.ENSP00000364265	0	0	0	0	0	0	0	0.418	0.418
DSG3	KRT14	9606.ENSP00000257189	9606.ENSP00000167586	0	0	0	0	0.211	0	0	0.567	0.644
DSG3	KRT6B	9606.ENSP00000257189	9606.ENSP00000252252	0	0	0	0	0.555	0	0	0.343	0.695
DSG3	KRT16	9606.ENSP00000257189	9606.ENSP00000301653	0	0	0	0	0.178	0	0	0.381	0.469
DSG3	SERPINA4	9606.ENSP00000257189	9606.ENSP00000450838	0	0	0	0	0	0	0	0.527	0.527
DSG3	KRT6A	9606.ENSP00000257189	9606.ENSP00000369317	0	0	0	0	0.28	0	0	0.403	0.552
DSG3	DSG4	9606.ENSP00000257189	9606.ENSP00000352785	0	0	0	0.936	0.061	0	0.9	0.649	0.906
DSG3	SPRR2D	9606.ENSP00000257189	9606.ENSP00000357746	0	0	0	0	0.076	0	0.9	0.098	0.909
DSG3	SPRR1A	9606.ENSP00000257189	9606.ENSP00000357751	0	0	0	0	0.143	0	0.9	0	0.91
DSG3	SPRR3	9606.ENSP00000257189	9606.ENSP00000330391	0	0	0	0	0.077	0	0.9	0.162	0.915
DSG3	SPRR1B	9606.ENSP00000257189	9606.ENSP00000306461	0	0	0	0	0.217	0	0.9	0.138	0.926
DSG3	IVL	9606.ENSP00000257189	9606.ENSP00000357753	0	0	0	0	0.087	0	0.9	0.473	0.947
DSG4	HOXC13	9606.ENSP00000352785	9606.ENSP00000243056	0	0	0	0	0	0	0	0.606	0.606
DSG4	KRT31	9606.ENSP00000352785	9606.ENSP00000251645	0	0	0	0	0.062	0	0	0.442	0.455
DSG4	KRT75	9606.ENSP00000352785	9606.ENSP00000252245	0	0	0	0	0.062	0	0	0.505	0.516
DSG4	KRT83	9606.ENSP00000352785	9606.ENSP00000293670	0	0	0	0	0.062	0	0	0.63	0.638
DSG4	SLC38A8	9606.ENSP00000352785	9606.ENSP00000299709	0	0	0	0	0	0	0	0.424	0.424
DSG4	SPRR1B	9606.ENSP00000352785	9606.ENSP00000306461	0	0	0	0	0.089	0	0.9	0.082	0.909
DSG4	SPRR3	9606.ENSP00000352785	9606.ENSP00000330391	0	0	0	0	0.085	0	0.9	0	0.904
DSG4	KRT81	9606.ENSP00000352785	9606.ENSP00000369349	0	0	0	0	0.062	0	0	0.473	0.484
DSG4	SLC15A1	9606.ENSP00000352785	9606.ENSP00000365686	0	0	0	0	0	0	0	0.528	0.528
DSG4	SERPINA4	9606.ENSP00000352785	9606.ENSP00000450838	0	0	0	0	0	0	0	0.622	0.622
DSG4	SPRR2D	9606.ENSP00000352785	9606.ENSP00000357746	0	0	0	0	0	0	0.9	0.046	0.9
DSG4	SPRR1A	9606.ENSP00000352785	9606.ENSP00000357751	0	0	0	0	0.083	0	0.9	0.112	0.911
DSG4	IVL	9606.ENSP00000352785	9606.ENSP00000357753	0	0	0	0	0.065	0	0.9	0.251	0.923
DSPP	STRA8	9606.ENSP00000382213	9606.ENSP00000275764	0	0	0	0	0	0	0	0.409	0.409
DSPP	HGD	9606.ENSP00000382213	9606.ENSP00000283871	0	0	0	0	0	0	0	0.643	0.643
DSPP	ESX1	9606.ENSP00000382213	9606.ENSP00000361669	0	0	0	0	0	0	0	0.515	0.515
DSPP	SPP1	9606.ENSP00000382213	9606.ENSP00000378517	0	0	0	0	0	0	0	0.717	0.717
DUSP13	SPINK1	9606.ENSP00000361785	9606.ENSP00000296695	0	0	0	0	0	0	0	0.54	0.54
DUSP13	TMEM82	9606.ENSP00000361785	9606.ENSP00000364938	0	0	0	0	0	0	0	0.421	0.42
DUSP9	SLC2A1	9606.ENSP00000345853	9606.ENSP00000416293	0	0	0	0	0.069	0	0	0.387	0.404
EEF1A2	KCNQ2	9606.ENSP00000217182	9606.ENSP00000352035	0	0	0	0	0.246	0.265	0	0.141	0.483
EFNA2	EPHA8	9606.ENSP00000215368	9606.ENSP00000166244	0	0	0	0	0.211	0.313	0.9	0.886	0.993
EFNA2	NPC1L1	9606.ENSP00000215368	9606.ENSP00000289547	0	0	0	0	0	0	0	0.456	0.456
EFNA2	EPHA10	9606.ENSP00000215368	9606.ENSP00000362139	0	0	0	0	0.188	0.313	0.9	0.886	0.992
EIF4E1B	PIWIL1	9606.ENSP00000323714	9606.ENSP00000245255	0	0	0	0	0	0	0.36	0.162	0.44
ELAVL2	SLC6A11	9606.ENSP00000380479	9606.ENSP00000254488	0	0	0	0	0.124	0	0	0.644	0.675
ELAVL2	IGF2BP3	9606.ENSP00000380479	9606.ENSP00000258729	0	0	0	0	0.051	0.524	0	0.297	0.655
ELAVL2	MYCN	9606.ENSP00000380479	9606.ENSP00000281043	0	0	0	0	0	0	0	0.401	0.4
ELAVL2	IGF2BP1	9606.ENSP00000380479	9606.ENSP00000290341	0	0	0	0	0.051	0.158	0	0.46	0.532
ELAVL2	LGALS4	9606.ENSP00000380479	9606.ENSP00000302100	0	0	0	0	0.061	0	0	0.922	0.923
ELAVL2	RBFOX1	9606.ENSP00000380479	9606.ENSP00000309117	0	0	0	0	0.193	0	0	0.509	0.587
ELAVL2	FOXG1	9606.ENSP00000380479	9606.ENSP00000339004	0	0	0	0	0.129	0	0	0.46	0.51
ELAVL2	NR2E1	9606.ENSP00000380479	9606.ENSP00000357979	0	0	0	0	0.097	0	0	0.429	0.463
ELAVL2	KIF1A	9606.ENSP00000380479	9606.ENSP00000438388	0	0	0	0	0.218	0	0	0.294	0.424
EMX2	HOXA11	9606.ENSP00000450962	9606.ENSP00000006015	0	0	0	0	0.062	0.083	0	0.425	0.463
EMX2	LHX5	9606.ENSP00000450962	9606.ENSP00000261731	0	0	0	0	0.062	0.078	0	0.572	0.597
EMX2	NEUROD1	9606.ENSP00000450962	9606.ENSP00000295108	0	0	0	0	0.098	0.05	0	0.385	0.427
EMX2	POU3F2	9606.ENSP00000450962	9606.ENSP00000329170	0	0	0	0	0.061	0.118	0	0.405	0.464
EMX2	SOX1	9606.ENSP00000450962	9606.ENSP00000330218	0	0	0	0	0.049	0.057	0	0.412	0.426
EMX2	FOXG1	9606.ENSP00000450962	9606.ENSP00000339004	0	0	0	0	0.089	0.053	0	0.788	0.801
EMX2	NR2E1	9606.ENSP00000450962	9606.ENSP00000357979	0	0	0	0	0.081	0.064	0	0.631	0.655
EMX2	HOXD13	9606.ENSP00000450962	9606.ENSP00000376322	0	0	0	0	0	0.083	0	0.654	0.669
EMX2	SP8	9606.ENSP00000450962	9606.ENSP00000408792	0	0	0	0	0.052	0.064	0	0.545	0.561
EMX2	FEZF1	9606.ENSP00000450962	9606.ENSP00000411145	0	0	0	0	0.055	0.064	0	0.444	0.466
EMX2	LHX1	9606.ENSP00000450962	9606.ENSP00000477829	0	0	0	0	0.062	0.078	0	0.618	0.641
EN2	ZIC1	9606.ENSP00000297375	9606.ENSP00000282928	0	0	0	0	0.179	0.064	0	0.441	0.533
EN2	FOXB1	9606.ENSP00000297375	9606.ENSP00000379369	0	0	0	0	0.265	0	0	0.219	0.402
EN2	POU3F2	9606.ENSP00000297375	9606.ENSP00000329170	0	0	0	0	0.17	0	0	0.334	0.423
EN2	ZIC2	9606.ENSP00000297375	9606.ENSP00000365514	0	0	0	0	0.145	0.064	0	0.357	0.44
EN2	ZIC4	9606.ENSP00000297375	9606.ENSP00000435509	0	0	0	0	0.153	0.064	0	0.355	0.444
EN2	LHX2	9606.ENSP00000297375	9606.ENSP00000362717	0	0	0	0	0.107	0	0	0.456	0.494
EN2	FOXG1	9606.ENSP00000297375	9606.ENSP00000339004	0	0	0	0	0.096	0	0	0.549	0.575
ENSG00000258947	ISL1	9606.ENSP00000320295	9606.ENSP00000230658	0	0	0	0	0.061	0.085	0	0.505	0.537
ENSG00000258947	TUBB2B	9606.ENSP00000320295	9606.ENSP00000259818	0	0	0	0.985	0.08	0.49	0	0.701	0.515
ENSG00000258947	NUF2	9606.ENSP00000320295	9606.ENSP00000271452	0	0	0	0	0.084	0.33	0	0.156	0.436
ENSG00000258947	NEUROD1	9606.ENSP00000320295	9606.ENSP00000295108	0	0	0	0	0.062	0	0	0.516	0.527
ENSG00000258947	PHOX2A	9606.ENSP00000320295	9606.ENSP00000298231	0	0	0	0	0.062	0	0	0.64	0.647
ENSG00000258947	TUBA3E	9606.ENSP00000320295	9606.ENSP00000318197	0	0	0	0.912	0.189	0.711	0.8	0.424	0.95
ENSG00000258947	POU3F2	9606.ENSP00000320295	9606.ENSP00000329170	0	0	0	0	0.063	0	0	0.394	0.408
ENSG00000258947	POU4F1	9606.ENSP00000320295	9606.ENSP00000366413	0	0	0	0	0.063	0	0	0.403	0.416
ENSG00000258947	OTX2	9606.ENSP00000320295	9606.ENSP00000343819	0	0	0	0	0.063	0	0	0.441	0.453
ENSG00000258947	FABP7	9606.ENSP00000320295	9606.ENSP00000357429	0	0	0	0	0.064	0	0	0.474	0.487
ENSG00000258947	SOX11	9606.ENSP00000320295	9606.ENSP00000322568	0	0	0	0	0.061	0	0	0.521	0.531
ENSG00000258947	TOP2A	9606.ENSP00000320295	9606.ENSP00000411532	0	0	0	0	0.063	0	0	0.521	0.532
ENSG00000258947	SOX1	9606.ENSP00000320295	9606.ENSP00000330218	0	0	0	0	0.063	0	0	0.559	0.569
ENSG00000258947	TUBA3C	9606.ENSP00000320295	9606.ENSP00000382982	0	0	0	0.916	0.189	0.711	0.8	0.369	0.95
ENSG00000267978	SSX1	9606.ENSP00000243314	9606.ENSP00000366118	0	0	0	0	0	0	0	0.423	0.422
ENSG00000267978	GAGE1	9606.ENSP00000243314	9606.ENSP00000484668	0	0	0	0	0	0	0	0.429	0.429
ENSG00000267978	PRAME	9606.ENSP00000243314	9606.ENSP00000445675	0	0	0	0	0	0	0	0.432	0.432
ENTPD8	TFPI2	9606.ENSP00000360561	9606.ENSP00000222543	0	0	0	0	0.061	0	0	0.453	0.464
EPHA10	EPHA8	9606.ENSP00000362139	9606.ENSP00000166244	0	0	0	0.925	0.064	0	0.9	0.505	0.905
EPHA10	PPP2R2C	9606.ENSP00000362139	9606.ENSP00000335083	0	0	0	0	0.096	0.088	0	0.415	0.476
EPHA8	LGALS4	9606.ENSP00000166244	9606.ENSP00000302100	0	0	0	0	0	0	0	0.428	0.428
EPS8L3	USH1C	9606.ENSP00000358820	9606.ENSP00000005226	0	0	0	0	0.213	0	0	0.587	0.661
EPS8L3	KRT20	9606.ENSP00000358820	9606.ENSP00000167588	0	0	0	0	0.433	0	0	0	0.433
EPS8L3	TM4SF5	9606.ENSP00000358820	9606.ENSP00000270560	0	0	0	0	0.45	0	0	0	0.45
EPS8L3	TM4SF20	9606.ENSP00000358820	9606.ENSP00000303028	0	0	0	0	0.081	0	0	0.495	0.516
EPS8L3	LCN15	9606.ENSP00000358820	9606.ENSP00000313833	0	0	0	0	0	0	0	0.436	0.436
EPS8L3	REG4	9606.ENSP00000358820	9606.ENSP00000346158	0	0	0	0	0.265	0	0	0.549	0.654
EPS8L3	MUC13	9606.ENSP00000358820	9606.ENSP00000485028	0	0	0	0	0.346	0	0	0.172	0.435
ESX1	OTX2	9606.ENSP00000361669	9606.ENSP00000343819	0	0	0	0.642	0	0.262	0	0.676	0.437
ESX1	PLAC1	9606.ENSP00000361669	9606.ENSP00000352173	0	0	0	0	0.076	0	0	0.447	0.467
ESX1	POU3F3	9606.ENSP00000361669	9606.ENSP00000355001	0	0	0	0	0.061	0.097	0	0.445	0.489
ESX1	SOX3	9606.ENSP00000361669	9606.ENSP00000359567	0	0	0	0	0	0.055	0	0.68	0.685
ESX1	TGIF2LX	9606.ENSP00000361669	9606.ENSP00000453704	0	0	0	0	0	0.05	0	0.711	0.714
ETNPPL	PAH	9606.ENSP00000296486	9606.ENSP00000448059	0	0	0	0	0.124	0	0	0.487	0.532
ETNPPL	FAM107A	9606.ENSP00000296486	9606.ENSP00000419124	0	0	0	0	0.149	0	0	0.542	0.594
ETV4	FGF4	9606.ENSP00000321835	9606.ENSP00000168712	0	0	0	0	0.098	0	0	0.448	0.481
ETV4	SCGB2A2	9606.ENSP00000321835	9606.ENSP00000227918	0	0	0	0	0	0	0	0.641	0.641
ETV4	ISL1	9606.ENSP00000321835	9606.ENSP00000230658	0	0	0	0	0	0.054	0	0.431	0.439
ETV4	MMP13	9606.ENSP00000321835	9606.ENSP00000260302	0	0	0	0	0	0	0	0.599	0.6
ETV4	FGF19	9606.ENSP00000321835	9606.ENSP00000294312	0	0	0	0	0.098	0	0	0.445	0.478
ETV4	SPINK1	9606.ENSP00000321835	9606.ENSP00000296695	0	0	0	0	0	0	0	0.424	0.424
ETV4	MMP1	9606.ENSP00000321835	9606.ENSP00000322788	0	0	0	0	0.065	0	0	0.442	0.455
ETV4	SP8	9606.ENSP00000321835	9606.ENSP00000408792	0	0	0	0	0.063	0.064	0	0.467	0.491
ETV4	FGF3	9606.ENSP00000321835	9606.ENSP00000334122	0	0	0	0	0	0	0	0.727	0.727
EVX1	FGF4	9606.ENSP00000419266	9606.ENSP00000168712	0	0	0	0	0.061	0	0	0.544	0.554
EVX1	ISL1	9606.ENSP00000419266	9606.ENSP00000230658	0	0	0	0	0	0	0	0.622	0.622
EVX1	T	9606.ENSP00000419266	9606.ENSP00000296946	0	0	0	0	0.096	0.056	0	0.42	0.461
EVX1	FOXG1	9606.ENSP00000419266	9606.ENSP00000339004	0	0	0	0	0	0	0	0.485	0.485
EVX1	NR2E1	9606.ENSP00000419266	9606.ENSP00000357979	0	0	0	0	0.082	0.05	0	0.45	0.478
EVX1	SIM1	9606.ENSP00000419266	9606.ENSP00000358210	0	0	0	0	0	0	0	0.501	0.501
EVX1	LHX2	9606.ENSP00000419266	9606.ENSP00000362717	0	0	0	0	0	0	0	0.422	0.422
EVX1	FOXB1	9606.ENSP00000419266	9606.ENSP00000379369	0	0	0	0	0.673	0	0	0.069	0.682
EVX1	NKAIN3	9606.ENSP00000419266	9606.ENSP00000429073	0	0	0	0	0	0	0	0.438	0.438
EVX1	LHX1	9606.ENSP00000419266	9606.ENSP00000477829	0	0	0	0	0.077	0	0	0.552	0.568
EXO1	MYBL2	9606.ENSP00000355506	9606.ENSP00000217026	0	0	0	0	0.579	0	0	0.108	0.609
EXO1	TROAP	9606.ENSP00000355506	9606.ENSP00000257909	0	0	0	0	0.538	0	0	0.105	0.569
EXO1	NEIL3	9606.ENSP00000355506	9606.ENSP00000264596	0.154	0	0	0	0.708	0	0	0.427	0.846
EXO1	NUF2	9606.ENSP00000355506	9606.ENSP00000271452	0	0	0	0	0.815	0	0	0.112	0.828
EXO1	MELK	9606.ENSP00000355506	9606.ENSP00000298048	0	0	0	0	0.836	0	0	0.227	0.867
EXO1	TPX2	9606.ENSP00000355506	9606.ENSP00000300403	0	0	0	0	0.827	0	0	0.122	0.842
EXO1	TERT	9606.ENSP00000355506	9606.ENSP00000309572	0	0	0	0	0.154	0.194	0	0.676	0.76
EXO1	UBE2C	9606.ENSP00000355506	9606.ENSP00000348838	0	0	0	0	0.744	0.084	0	0.142	0.781
EXO1	KIF18B	9606.ENSP00000355506	9606.ENSP00000465992	0	0	0	0	0.583	0	0	0.065	0.593
EXO1	NEK2	9606.ENSP00000355506	9606.ENSP00000355966	0	0	0	0	0.7	0	0	0.174	0.742
EXO1	KIF4A	9606.ENSP00000355506	9606.ENSP00000363524	0	0	0	0	0.744	0	0	0.116	0.764
EXO1	KIF14	9606.ENSP00000355506	9606.ENSP00000356319	0	0	0	0	0.781	0	0	0.209	0.819
EXO1	KIF2C	9606.ENSP00000355506	9606.ENSP00000361298	0	0	0	0	0.791	0	0	0.17	0.819
EXO1	HJURP	9606.ENSP00000355506	9606.ENSP00000414109	0	0	0	0	0.793	0	0	0.225	0.832
EXO1	TOP2A	9606.ENSP00000355506	9606.ENSP00000411532	0.046	0	0	0	0.793	0.05	0	0.504	0.894
EXO1	MCM10	9606.ENSP00000355506	9606.ENSP00000418268	0	0	0	0	0.838	0	0	0.469	0.91
F13B	SPP2	9606.ENSP00000356382	9606.ENSP00000168148	0	0	0	0	0.644	0	0	0	0.644
F13B	HRG	9606.ENSP00000356382	9606.ENSP00000232003	0	0	0	0	0.675	0	0	0.144	0.71
F13B	PROC	9606.ENSP00000356382	9606.ENSP00000234071	0	0	0	0	0.379	0	0.9	0	0.935
F13B	FETUB	9606.ENSP00000356382	9606.ENSP00000265029	0	0	0	0	0.592	0	0	0.048	0.595
F13B	HGD	9606.ENSP00000356382	9606.ENSP00000283871	0	0	0	0	0.662	0	0	0	0.662
F13B	PRODH2	9606.ENSP00000356382	9606.ENSP00000301175	0	0	0	0	0.215	0	0	0.267	0.4
F13B	TM4SF4	9606.ENSP00000356382	9606.ENSP00000305852	0	0	0	0	0.58	0	0	0	0.58
F13B	FGB	9606.ENSP00000356382	9606.ENSP00000306099	0	0	0	0	0.64	0	0.9	0.529	0.981
F13B	FGA	9606.ENSP00000356382	9606.ENSP00000306361	0	0	0	0	0.685	0	0.9	0.679	0.989
F13B	F2	9606.ENSP00000356382	9606.ENSP00000308541	0	0	0	0	0.308	0	0.9	0.226	0.941
F13B	SLC2A2	9606.ENSP00000356382	9606.ENSP00000323568	0	0	0	0	0.693	0	0	0.049	0.696
F13B	HNF4G	9606.ENSP00000356382	9606.ENSP00000379701	0	0	0	0	0.445	0	0	0.177	0.523
F13B	PAH	9606.ENSP00000356382	9606.ENSP00000448059	0	0	0	0	0.671	0	0	0.097	0.69
F13B	GC	9606.ENSP00000356382	9606.ENSP00000421725	0	0	0	0	0.672	0	0	0.243	0.741
F2	SLC5A5	9606.ENSP00000308541	9606.ENSP00000222248	0	0	0	0	0	0	0	0.476	0.476
F2	TFPI2	9606.ENSP00000308541	9606.ENSP00000222543	0	0	0	0	0.159	0.132	0	0.467	0.577
F2	HRG	9606.ENSP00000308541	9606.ENSP00000232003	0	0	0	0	0.308	0	0	0.41	0.574
F2	PROC	9606.ENSP00000308541	9606.ENSP00000234071	0	0	0.4	0.741	0.549	0.909	0.9	0.582	0.996
F2	KISS1R	9606.ENSP00000308541	9606.ENSP00000234371	0	0	0	0	0.063	0	0.9	0	0.902
F2	GNGT1	9606.ENSP00000308541	9606.ENSP00000248572	0	0	0	0	0	0	0.9	0	0.9
F2	NTS	9606.ENSP00000308541	9606.ENSP00000256010	0	0	0	0	0.327	0	0.9	0.412	0.956
F2	MMP13	9606.ENSP00000308541	9606.ENSP00000260302	0	0	0	0	0	0	0	0.465	0.465
F2	NMU	9606.ENSP00000308541	9606.ENSP00000264218	0	0	0	0	0.118	0	0.9	0	0.908
F2	FETUB	9606.ENSP00000308541	9606.ENSP00000265029	0	0	0	0	0.306	0	0	0.188	0.413
F2	UGT2B10	9606.ENSP00000308541	9606.ENSP00000265403	0	0	0	0	0.549	0	0	0	0.549
F2	TM4SF5	9606.ENSP00000308541	9606.ENSP00000270560	0	0	0	0	0.54	0	0	0	0.54
F2	IGFBP1	9606.ENSP00000308541	9606.ENSP00000275525	0	0	0	0	0.621	0	0	0.065	0.63
F2	HGD	9606.ENSP00000308541	9606.ENSP00000283871	0	0	0	0	0.282	0	0	0.556	0.667
F2	PDCL2	9606.ENSP00000308541	9606.ENSP00000295645	0	0	0	0	0	0	0	0.7	0.7
F2	PRODH2	9606.ENSP00000308541	9606.ENSP00000301175	0	0	0	0	0.526	0	0	0	0.526
F2	NTSR2	9606.ENSP00000308541	9606.ENSP00000303686	0	0	0	0	0.061	0	0.9	0	0.902
F2	FGB	9606.ENSP00000308541	9606.ENSP00000306099	0	0	0	0	0.615	0.845	0.9	0.662	0.997
F2	FGA	9606.ENSP00000308541	9606.ENSP00000306361	0	0	0	0	0.804	0.937	0.9	0.619	0.999
F2	IL31RA	9606.ENSP00000308541	9606.ENSP00000415900	0	0	0	0	0	0	0	0.444	0.444
F2	SERPINA4	9606.ENSP00000308541	9606.ENSP00000450838	0	0	0	0	0.387	0.129	0	0.179	0.523
F2	TF	9606.ENSP00000308541	9606.ENSP00000385834	0	0	0	0	0.343	0.067	0	0.29	0.527
F2	INS	9606.ENSP00000308541	9606.ENSP00000380432	0	0	0	0	0	0	0	0.597	0.597
F2	GC	9606.ENSP00000308541	9606.ENSP00000421725	0	0	0	0	0.479	0	0	0.293	0.616
F2	FGL1	9606.ENSP00000308541	9606.ENSP00000381133	0	0	0	0	0.57	0.157	0	0	0.622
F2	PAH	9606.ENSP00000308541	9606.ENSP00000448059	0	0	0	0	0.595	0	0	0.158	0.644
F2	SPP1	9606.ENSP00000308541	9606.ENSP00000378517	0	0	0	0	0.062	0.515	0	0.483	0.744
F2	SERPINA7	9606.ENSP00000308541	9606.ENSP00000329374	0	0	0	0	0.689	0.129	0	0.225	0.772
F2	GNG4	9606.ENSP00000308541	9606.ENSP00000375727	0	0	0	0	0	0	0.9	0	0.9
F2	NPSR1	9606.ENSP00000308541	9606.ENSP00000370950	0	0	0	0	0	0	0.9	0	0.9
F2	TAC3	9606.ENSP00000308541	9606.ENSP00000483110	0	0	0	0	0.077	0	0.9	0.059	0.905
F2	GAST	9606.ENSP00000308541	9606.ENSP00000331358	0	0	0	0	0	0	0.9	0.126	0.908
F2	NTSR1	9606.ENSP00000308541	9606.ENSP00000359532	0	0	0	0	0.061	0	0.9	0.121	0.91
F2	GCGR	9606.ENSP00000308541	9606.ENSP00000383558	0	0	0	0	0.12	0	0.9	0.092	0.913
F2	TAC1	9606.ENSP00000308541	9606.ENSP00000321106	0	0	0	0	0	0	0.9	0.247	0.921
F2	GCG	9606.ENSP00000308541	9606.ENSP00000387662	0	0	0	0	0	0	0.9	0.405	0.937
FABP4	S100A7	9606.ENSP00000256104	9606.ENSP00000357712	0	0	0	0	0	0	0	0.463	0.463
FABP4	SPP1	9606.ENSP00000256104	9606.ENSP00000378517	0	0	0	0	0	0	0	0.472	0.472
FABP4	FGF21	9606.ENSP00000256104	9606.ENSP00000471477	0	0	0	0	0	0	0	0.531	0.531
FABP4	GPIHBP1	9606.ENSP00000256104	9606.ENSP00000480053	0	0	0	0	0.21	0	0	0.49	0.581
FABP4	INS	9606.ENSP00000256104	9606.ENSP00000380432	0	0	0	0	0	0	0	0.83	0.83
FABP4	FABP7	9606.ENSP00000256104	9606.ENSP00000357429	0	0	0	0.953	0	0	0.9	0.536	0.902
FABP7	PHOX2B	9606.ENSP00000357429	9606.ENSP00000226382	0	0	0	0	0.064	0.084	0	0.357	0.4
FABP7	ZIC1	9606.ENSP00000357429	9606.ENSP00000282928	0	0	0	0	0.182	0.05	0	0.388	0.482
FABP7	NEUROD1	9606.ENSP00000357429	9606.ENSP00000295108	0	0	0	0	0.096	0	0	0.482	0.512
FABP7	POU3F2	9606.ENSP00000357429	9606.ENSP00000329170	0	0	0	0	0.157	0	0	0.637	0.681
FABP7	SOX1	9606.ENSP00000357429	9606.ENSP00000330218	0	0	0	0	0.157	0	0	0.511	0.57
FABP7	FOXG1	9606.ENSP00000357429	9606.ENSP00000339004	0	0	0	0	0.1	0.05	0	0.415	0.456
FABP7	POU3F3	9606.ENSP00000357429	9606.ENSP00000355001	0	0	0	0	0.163	0	0	0.324	0.409
FABP7	SOX3	9606.ENSP00000357429	9606.ENSP00000359567	0	0	0	0	0.09	0	0	0.394	0.425
FAM107A	GPM6A	9606.ENSP00000419124	9606.ENSP00000280187	0	0	0	0	0.397	0	0	0.128	0.452
FAM107A	TERT	9606.ENSP00000419124	9606.ENSP00000309572	0	0	0	0	0	0	0	0.451	0.451
FAM133A	MAGEC1	9606.ENSP00000318974	9606.ENSP00000285879	0	0	0	0	0.139	0	0	0.434	0.492
FAM133A	MAGEC2	9606.ENSP00000318974	9606.ENSP00000354660	0	0	0	0	0.215	0	0	0.281	0.412
FER1L6	SYT13	9606.ENSP00000428280	9606.ENSP00000020926	0	0	0	0	0.062	0	0	0.424	0.437
FER1L6	TRIM72	9606.ENSP00000428280	9606.ENSP00000312675	0	0	0	0	0.063	0	0	0.407	0.42
FER1L6	SYT14	9606.ENSP00000428280	9606.ENSP00000355986	0	0	0	0	0.064	0	0	0.444	0.457
FER1L6	SYT12	9606.ENSP00000428280	9606.ENSP00000377520	0	0	0	0	0.096	0	0	0.393	0.427
FER1L6	SYT7	9606.ENSP00000428280	9606.ENSP00000444201	0	0	0	0	0.062	0	0	0.413	0.426
FETUB	YBX2	9606.ENSP00000265029	9606.ENSP00000007699	0	0	0	0	0	0	0	0.582	0.582
FETUB	SPP2	9606.ENSP00000265029	9606.ENSP00000168148	0	0	0	0	0.514	0	0	0.295	0.642
FETUB	HRG	9606.ENSP00000265029	9606.ENSP00000232003	0	0	0	0.61	0.663	0	0	0.492	0.725
FETUB	PROC	9606.ENSP00000265029	9606.ENSP00000234071	0	0	0	0	0.659	0	0	0.067	0.668
FETUB	SOHLH1	9606.ENSP00000265029	9606.ENSP00000404438	0	0	0	0	0	0	0	0.405	0.405
FETUB	TF	9606.ENSP00000265029	9606.ENSP00000385834	0	0	0	0	0.259	0	0	0.365	0.509
FETUB	HGD	9606.ENSP00000265029	9606.ENSP00000283871	0	0	0	0	0.524	0	0	0	0.524
FETUB	SLC2A2	9606.ENSP00000265029	9606.ENSP00000323568	0	0	0	0	0.573	0	0	0	0.573
FETUB	TM4SF4	9606.ENSP00000265029	9606.ENSP00000305852	0	0	0	0	0.528	0	0	0.298	0.654
FETUB	PAH	9606.ENSP00000265029	9606.ENSP00000448059	0	0	0	0	0.677	0	0	0	0.677
FETUB	GC	9606.ENSP00000265029	9606.ENSP00000421725	0	0	0	0	0.674	0	0	0.381	0.79
FETUB	FGB	9606.ENSP00000265029	9606.ENSP00000306099	0	0	0	0	0.837	0	0	0	0.837
FETUB	FGA	9606.ENSP00000265029	9606.ENSP00000306361	0	0	0	0	0.831	0	0	0.093	0.841
FEZF1	KISS1R	9606.ENSP00000411145	9606.ENSP00000234371	0	0	0	0	0	0.05	0	0.424	0.429
FEZF1	LHX5	9606.ENSP00000411145	9606.ENSP00000261731	0	0	0	0	0.111	0.265	0	0.233	0.455
FEZF1	OTX2	9606.ENSP00000411145	9606.ENSP00000343819	0	0	0	0	0.171	0.064	0	0.456	0.541
FEZF1	LHX2	9606.ENSP00000411145	9606.ENSP00000362717	0	0	0	0	0.062	0.077	0	0.5	0.529
FEZF1	LHX1	9606.ENSP00000411145	9606.ENSP00000477829	0	0	0	0	0	0.265	0	0.236	0.414
FGA	SPP2	9606.ENSP00000306361	9606.ENSP00000168148	0	0	0	0	0.73	0	0.9	0.049	0.972
FGA	HRG	9606.ENSP00000306361	9606.ENSP00000232003	0	0	0	0	0.753	0.379	0.9	0.468	0.99
FGA	PROC	9606.ENSP00000306361	9606.ENSP00000234071	0	0	0	0	0.586	0.157	0.9	0.265	0.97
FGA	VGF	9606.ENSP00000306361	9606.ENSP00000249330	0	0	0	0	0	0	0.9	0.05	0.9
FGA	UGT2B10	9606.ENSP00000306361	9606.ENSP00000265403	0	0	0	0	0.573	0	0	0	0.573
FGA	IGFBP1	9606.ENSP00000306361	9606.ENSP00000275525	0	0	0	0	0.558	0	0.9	0.147	0.959
FGA	HGD	9606.ENSP00000306361	9606.ENSP00000283871	0	0	0	0	0.708	0	0	0.302	0.787
FGA	FIGF	9606.ENSP00000306361	9606.ENSP00000297904	0	0	0	0	0	0	0.9	0.041	0.9
FGA	TM4SF4	9606.ENSP00000306361	9606.ENSP00000305852	0	0	0	0	0.585	0	0	0	0.585
FGA	FGB	9606.ENSP00000306361	9606.ENSP00000306099	0	0	0	0.744	0.992	0.961	0.9	0.955	0.999
FGA	KLK6	9606.ENSP00000306361	9606.ENSP00000366047	0	0	0	0	0	0.432	0	0.076	0.453
FGA	SERPINA4	9606.ENSP00000306361	9606.ENSP00000450838	0	0	0	0	0.468	0	0	0.05	0.473
FGA	SLC2A2	9606.ENSP00000306361	9606.ENSP00000323568	0	0	0	0	0.661	0	0	0.061	0.668
FGA	SERPINA7	9606.ENSP00000306361	9606.ENSP00000329374	0	0	0	0	0.728	0	0	0.16	0.762
FGA	PAH	9606.ENSP00000306361	9606.ENSP00000448059	0	0	0	0	0.769	0	0	0.16	0.798
FGA	GC	9606.ENSP00000306361	9606.ENSP00000421725	0	0	0	0	0.838	0	0	0.151	0.856
FGA	SPP1	9606.ENSP00000306361	9606.ENSP00000378517	0	0	0	0	0.076	0	0.9	0.091	0.908
FGA	FGL1	9606.ENSP00000306361	9606.ENSP00000381133	0	0	0	0.852	0.673	0	0.72	0.443	0.91
FGA	TF	9606.ENSP00000306361	9606.ENSP00000385834	0	0	0	0	0.292	0	0.9	0.246	0.942
FGB	SPP2	9606.ENSP00000306099	9606.ENSP00000168148	0	0	0	0	0.639	0	0	0.05	0.642
FGB	HRG	9606.ENSP00000306099	9606.ENSP00000232003	0	0	0	0	0.654	0	0.9	0.528	0.982
FGB	PROC	9606.ENSP00000306099	9606.ENSP00000234071	0	0	0	0	0.358	0.157	0.9	0.116	0.945
FGB	UGT2B10	9606.ENSP00000306099	9606.ENSP00000265403	0	0	0	0	0.482	0	0	0	0.482
FGB	IGFBP1	9606.ENSP00000306099	9606.ENSP00000275525	0	0	0	0	0.352	0	0	0.121	0.406
FGB	HGD	9606.ENSP00000306099	9606.ENSP00000283871	0	0	0	0	0.655	0	0	0.259	0.733
FGB	FIGF	9606.ENSP00000306099	9606.ENSP00000297904	0	0	0	0	0	0	0.9	0.046	0.9
FGB	PRODH2	9606.ENSP00000306099	9606.ENSP00000301175	0	0	0	0	0.403	0	0	0	0.403
FGB	TM4SF4	9606.ENSP00000306099	9606.ENSP00000305852	0	0	0	0	0.534	0	0	0	0.534
FGB	KLK6	9606.ENSP00000306099	9606.ENSP00000366047	0	0	0	0	0	0.432	0	0	0.432
FGB	TF	9606.ENSP00000306099	9606.ENSP00000385834	0	0	0	0	0.237	0	0	0.348	0.482
FGB	SERPINA4	9606.ENSP00000306099	9606.ENSP00000450838	0	0	0	0	0.491	0	0	0.059	0.501
FGB	SERPINA7	9606.ENSP00000306099	9606.ENSP00000329374	0	0	0	0	0.555	0	0	0.14	0.601
FGB	SLC2A2	9606.ENSP00000306099	9606.ENSP00000323568	0	0	0	0	0.621	0	0	0.043	0.622
FGB	PAH	9606.ENSP00000306099	9606.ENSP00000448059	0	0	0	0	0.749	0	0	0.137	0.774
FGB	GC	9606.ENSP00000306099	9606.ENSP00000421725	0	0	0	0	0.836	0	0	0.236	0.87
FGB	FGL1	9606.ENSP00000306099	9606.ENSP00000381133	0	0	0	0.84	0.684	0	0.72	0.756	0.918
FGF19	FGF4	9606.ENSP00000294312	9606.ENSP00000168712	0	0	0	0.662	0.133	0	0.9	0.659	0.929
FGF19	MYCN	9606.ENSP00000294312	9606.ENSP00000281043	0	0	0	0	0.076	0	0	0.497	0.515
FGF19	WNT3A	9606.ENSP00000294312	9606.ENSP00000284523	0	0	0	0	0	0.164	0	0.367	0.448
FGF19	SST	9606.ENSP00000294312	9606.ENSP00000287641	0	0	0	0	0	0	0	0.42	0.42
FGF19	OTX2	9606.ENSP00000294312	9606.ENSP00000343819	0	0	0	0	0.107	0.074	0	0.354	0.419
FGF19	GCG	9606.ENSP00000294312	9606.ENSP00000387662	0	0	0	0	0	0	0	0.445	0.445
FGF19	MYEOV	9606.ENSP00000294312	9606.ENSP00000308330	0	0	0	0	0	0	0	0.475	0.475
FGF19	GALNT14	9606.ENSP00000294312	9606.ENSP00000314500	0	0	0	0	0	0	0	0.526	0.526
FGF19	INS	9606.ENSP00000294312	9606.ENSP00000380432	0	0	0	0	0	0	0	0.754	0.754
FGF21	LYPD3	9606.ENSP00000471477	9606.ENSP00000244333	0	0	0	0	0	0	0	0.525	0.525
FGF21	G6PC	9606.ENSP00000471477	9606.ENSP00000253801	0	0	0	0	0.062	0	0	0.651	0.659
FGF21	MSTN	9606.ENSP00000471477	9606.ENSP00000260950	0	0	0	0	0	0.05	0	0.426	0.431
FGF21	IGFBP1	9606.ENSP00000471477	9606.ENSP00000275525	0	0	0	0	0.062	0	0	0.619	0.627
FGF21	SST	9606.ENSP00000471477	9606.ENSP00000287641	0	0	0	0	0	0	0	0.416	0.416
FGF21	INS	9606.ENSP00000471477	9606.ENSP00000380432	0	0	0	0	0	0	0	0.901	0.901
FGF21	GCGR	9606.ENSP00000471477	9606.ENSP00000383558	0	0	0	0	0.062	0	0	0.695	0.703
FGF21	GCG	9606.ENSP00000471477	9606.ENSP00000387662	0	0	0	0	0	0	0	0.641	0.641
FGF21	SLC2A1	9606.ENSP00000471477	9606.ENSP00000416293	0	0	0	0	0	0	0	0.444	0.444
FGF3	FGF4	9606.ENSP00000334122	9606.ENSP00000168712	0	0	0	0.756	0.09	0	0.9	0.798	0.923
FGF3	WNT3A	9606.ENSP00000334122	9606.ENSP00000284523	0	0	0	0	0.061	0.164	0	0.475	0.551
FGF3	NEUROD1	9606.ENSP00000334122	9606.ENSP00000295108	0	0	0	0	0.14	0	0	0.387	0.451
FGF3	MMP3	9606.ENSP00000334122	9606.ENSP00000299855	0	0	0	0	0	0	0	0.435	0.435
FGF3	MYEOV	9606.ENSP00000334122	9606.ENSP00000308330	0	0	0	0	0	0	0	0.53	0.53
FGF3	FOXI3	9606.ENSP00000334122	9606.ENSP00000478384	0	0	0	0	0.061	0	0	0.412	0.424
FGF3	SOX3	9606.ENSP00000334122	9606.ENSP00000359567	0	0	0	0	0.061	0	0	0.466	0.477
FGF3	INS	9606.ENSP00000334122	9606.ENSP00000380432	0	0	0	0	0	0	0	0.695	0.695
FGF4	MMP3	9606.ENSP00000168712	9606.ENSP00000299855	0	0	0	0	0	0	0	0.409	0.409
FGF4	SOX3	9606.ENSP00000168712	9606.ENSP00000359567	0	0	0	0	0.098	0	0	0.407	0.442
FGF4	NR0B1	9606.ENSP00000168712	9606.ENSP00000368253	0	0	0	0	0.079	0	0	0.427	0.45
FGF4	HOXD11	9606.ENSP00000168712	9606.ENSP00000249504	0	0	0	0	0	0	0	0.455	0.455
FGF4	SOX1	9606.ENSP00000168712	9606.ENSP00000330218	0	0	0	0	0.062	0	0	0.457	0.469
FGF4	MYEOV	9606.ENSP00000168712	9606.ENSP00000308330	0	0	0	0	0	0	0	0.491	0.491
FGF4	FOXD3	9606.ENSP00000168712	9606.ENSP00000360157	0	0	0	0	0.121	0	0	0.46	0.505
FGF4	OTX2	9606.ENSP00000168712	9606.ENSP00000343819	0	0	0	0	0.112	0.074	0	0.48	0.535
FGF4	HOXD13	9606.ENSP00000168712	9606.ENSP00000376322	0	0	0	0	0	0	0	0.578	0.578
FGF4	LIN28A	9606.ENSP00000168712	9606.ENSP00000363314	0	0	0	0	0.282	0	0	0.45	0.588
FGF4	T	9606.ENSP00000168712	9606.ENSP00000296946	0	0	0	0	0.084	0	0	0.626	0.642
FGF4	WNT3A	9606.ENSP00000168712	9606.ENSP00000284523	0	0	0	0	0	0.164	0	0.606	0.656
FGF4	INS	9606.ENSP00000168712	9606.ENSP00000380432	0	0	0	0	0	0	0	0.707	0.707
FGF4	GREM1	9606.ENSP00000168712	9606.ENSP00000478319	0	0	0	0	0	0	0	0.91	0.911
FGF5	WNT3A	9606.ENSP00000311697	9606.ENSP00000284523	0	0	0	0	0	0.164	0	0.426	0.5
FGF5	T	9606.ENSP00000311697	9606.ENSP00000296946	0	0	0	0	0.061	0	0	0.58	0.588
FGF5	NKX2-5	9606.ENSP00000311697	9606.ENSP00000327758	0	0	0	0	0	0	0	0.415	0.415
FGF5	NR0B1	9606.ENSP00000311697	9606.ENSP00000368253	0	0	0	0	0	0	0	0.486	0.486
FGF5	SOX3	9606.ENSP00000311697	9606.ENSP00000359567	0	0	0	0	0	0	0	0.495	0.495
FGF5	SOX1	9606.ENSP00000311697	9606.ENSP00000330218	0	0	0	0	0	0	0	0.614	0.614
FGF5	INS	9606.ENSP00000311697	9606.ENSP00000380432	0	0	0	0	0	0	0	0.691	0.691
FGF5	OTX2	9606.ENSP00000311697	9606.ENSP00000343819	0	0	0	0	0.061	0.074	0	0.682	0.699
FGL1	IGFBP1	9606.ENSP00000381133	9606.ENSP00000275525	0	0	0	0	0.553	0	0	0.05	0.557
FGL1	SERPINA7	9606.ENSP00000381133	9606.ENSP00000329374	0	0	0	0	0.562	0	0	0.066	0.574
FGL1	SERPINA4	9606.ENSP00000381133	9606.ENSP00000450838	0	0	0	0	0.399	0	0	0.089	0.429
FIGF	HRG	9606.ENSP00000297904	9606.ENSP00000232003	0	0	0	0	0	0	0.9	0.085	0.904
[truncated: 1,893 more rows]

## Sheet: Table S5
	Table S5 Results of Molecular Docking Model
	Name	Structure	1: Total_Scor	2: Crash	3: Polar	4: D_SCORE	5: PMF_SCORE	6: G_SCORE	7: CHEMSCORE	8: CSCORE	9: GLOBAL_CSCORE
1	INS		6.81	-3.98	3.43	-185.094	-83.605	-224.316	-43.426	3	3
2	GCG		6.27	-2.03	1.14	-149.724	1.991	-180.521	-24.579	5	5
